# Supplementary material for: Structural variants shape driver combinations and outcomes in pediatric high-grade glioma
Source: Research Square preprint supplement (doi:10.21203/rs.3.rs-389596/v1), 2021-04-14
Supplement: Supplementary file 1 [file 2cd442418e0f36a3a4e63a79.xlsx]

## Sheet: Sheet1
Construction of a lentiviral minimal promoter firefly luciferase reporter from Promega® pGL4.26 and pLKO.1 backbone
Name	Primer 5' (overlap/ANNEAL) 3'
lucminP_fwd	ccacctcccaaccccgagggAGTACGTCTCTCAAGGATAAGTAAG
lucminP_rev	ccatttgtctcaagatctagGCCCAATACGCAAACGGATC
PCR of the e1a and e1b fragments of the H3K27ac peak in the CCDC26SV consensus amplicon
Name	Primer 5'->3'
e1a_fwd	CAGCCAGGTACCGCACAGAAGCACA
e1a_rev	CCTCAAGCTAGCCAGCATCTATTCACAGGGTCTTAGGC
e1b_fwd	ATAGGTACCACAACGCACACTCTCTTTCCTCTG
e1b_rev	ATAGCTAGCGCATCTAGGTCTGTGGAAGTTAT
