# Supplementary material for: Structural variants shape driver combinations and outcomes in pediatric high-grade glioma
Source: Research Square preprint supplement (doi:10.21203/rs.3.rs-389596/v1), 2021-04-14
Supplement: Supplementary file 2 [file 4091c93c54c145ec278345f7.xlsx]

## Sheet: 20200618cball_relSVsignaVarCorr
i.mut	p_value	ratio	sig	sign.ratio	V1	qvalue
8q24.21_Amp(MYC)	1.1704e-06	3.09406	complx_interchr	High Activity	8q24.21_Amp(MYC):1	0.000679295
17p13.3_Del(TP53)	5.46852e-06	2.42507	complx_interchr	High Activity	17p13.3_Del(TP53):1	0.00188226
TP53:missense.snv	0.000169734	2.01812	complx_interchr	High Activity	TP53:missense.snv:1	0.0180734
POLR2I:flank.sv	0.000189757	3.36357	complx_interchr	High Activity	POLR2I:flank.sv:1	0.0180734
10q26.3_Del(MGMT)	0.000195376	1.97903	complx_interchr	High Activity	10q26.3_Del(MGMT):1	0.0180734
LSM14A:flank.sv	0.000210035	2.97652	complx_interchr	High Activity	LSM14A:flank.sv:1	0.0180734
19q13.43_Del	0.000431916	1.96896	complx_interchr	High Activity	19q13.43_Del:1	0.0286936
PTPRD:flank.sv	0.000444604	2.57188	complx_interchr	High Activity	PTPRD:flank.sv:1	0.0286936
MET:flank.sv	0.00066843	2.87329	complx_interchr	High Activity	MET:flank.sv:1	0.0363273
FIP1L1:flank.sv	0.00108161	2.08705	complx_interchr	High Activity	FIP1L1:flank.sv:1	0.0449657
PDGFRA:ExChr_amp	0.00127808	2.19875	complx_interchr	High Activity	PDGFRA:ExChr_amp:1	0.0471337
FIP1L1:ExChr_amp	0.00127808	2.19875	complx_interchr	High Activity	FIP1L1:ExChr_amp:1	0.0471337
4q12_Amp(PDGFRA)	0.00142075	1.8296	complx_interchr	High Activity	4q12_Amp(PDGFRA):1	0.0491018
EXT2:flank.sv	0.00150507	2.95955	complx_interchr	High Activity	EXT2:flank.sv:1	0.0491018
ALKBH3:flank.sv	0.00150507	2.95955	complx_interchr	High Activity	ALKBH3:flank.sv:1	0.0491018
SOX2:flank.sv	0.00158205	2.59034	complx_interchr	High Activity	SOX2:flank.sv:1	0.0491018
KIT:flank.sv	0.00166431	1.9942	complx_interchr	High Activity	KIT:flank.sv:1	0.0491018
PDGFRA:flank.sv	0.00166431	1.9942	complx_interchr	High Activity	PDGFRA:flank.sv:1	0.0491018
KDR:flank.sv	0.00173432	2.09186	complx_interchr	High Activity	KDR:flank.sv:1	0.049415
CCDC26:flank.sv	0.00181849	2.24233	complx_interchr	High Activity	CCDC26:flank.sv:1	0.049415
CLOCK:flank.sv	0.00197692	1.95283	complx_interchr	High Activity	CLOCK:flank.sv:1	0.051034
PTPRD:coding.sv	0.0021042	2.03401	complx_interchr	High Activity	PTPRD:coding.sv:1	0.052995
ERC1:coding.sv	0.00252731	3.35782	complx_interchr	High Activity	ERC1:coding.sv:1	0.0604085
CTNND1:flank.sv	0.00290286	2.52288	complx_interchr	High Activity	CTNND1:flank.sv:1	0.0637763
LARP4B:flank.sv	0.00371651	3.10859	complx_interchr	High Activity	LARP4B:flank.sv:1	0.0642785
PRKD1:coding.sv	0.00372821	3.29795	complx_interchr	High Activity	PRKD1:coding.sv:1	0.0642785
EGFR:flank.sv	0.00379721	2.46262	complx_interchr	High Activity	EGFR:flank.sv:1	0.0642785
RAD52:flank.sv	0.00391048	2.31645	complx_interchr	High Activity	RAD52:flank.sv:1	0.0647116
CHIC2:ExChr_amp	0.00426919	2.04327	complx_interchr	High Activity	CHIC2:ExChr_amp:1	0.0647116
AFF3:coding.sv	0.00441781	3.39393	complx_interchr	High Activity	AFF3:coding.sv:1	0.0647116
KIT:ExChr_amp	0.00470055	2.01161	complx_interchr	High Activity	KIT:ExChr_amp:1	0.0664901
KDR:ExChr_amp	0.00647263	2.0914	complx_interchr	High Activity	KDR:ExChr_amp:1	0.0774313
CLOCK:ExChr_amp	0.00647263	2.0914	complx_interchr	High Activity	CLOCK:ExChr_amp:1	0.0774313
ELANE:flank.sv	0.00652192	2.8962	complx_interchr	High Activity	ELANE:flank.sv:1	0.0774313
FSTL3:flank.sv	0.00652192	2.8962	complx_interchr	High Activity	FSTL3:flank.sv:1	0.0774313
FXR1:flank.sv	0.00660399	2.31735	complx_interchr	High Activity	FXR1:flank.sv:1	0.0774313
CTNNA2:flank.sv	0.00666643	1.76351	complx_interchr	High Activity	CTNNA2:flank.sv:1	0.0774313
8p23.2_Del	0.00682381	2.07816	complx_interchr	High Activity	8p23.2_Del:1	0.0774313
MAP2K4:coding.sv	0.00738815	3.75687	complx_interchr	High Activity	MAP2K4:coding.sv:1	0.079664
10q23.31_Del(PTEN)	0.00758479	1.73713	complx_interchr	High Activity	10q23.31_Del(PTEN):1	0.0799187
FIP1L1:part.amp	0.00820046	1.84874	complx_interchr	High Activity	FIP1L1:part.amp:1	0.0818826
NDRG1:part.amp	0.00824696	3.1403	complx_interchr	High Activity	NDRG1:part.amp:1	0.0818826
6q25.2_Del	0.00850498	2.55446	complx_interchr	High Activity	6q25.2_Del:1	0.0828512
ERC1:flank.sv	0.00977122	2.15581	complx_interchr	High Activity	ERC1:flank.sv:1	0.0885065
HLF:flank.sv	0.0110034	1.83845	complx_interchr	High Activity	HLF:flank.sv:1	0.0906666
MLLT3:coding.sv	0.0111217	2.41583	complx_interchr	High Activity	MLLT3:coding.sv:1	0.0906666
EGFR:coding.sv	0.011927	2.51573	complx_interchr	High Activity	EGFR:coding.sv:1	0.0954713
EGFR:ExChr_amp	0.011927	2.51573	complx_interchr	High Activity	EGFR:ExChr_amp:1	0.0954713
GPC5:coding.sv	0.0122946	2.49763	complx_interchr	High Activity	GPC5:coding.sv:1	0.0976565
MTAP:flank.sv	0.0124633	2.00247	complx_interchr	High Activity	MTAP:flank.sv:1	0.098241
MLLT3:flank.sv	0.0130614	1.92687	complx_interchr	High Activity	MLLT3:flank.sv:1	0.0992363
MAPK1:flank.sv	0.0130834	2.306	complx_interchr	High Activity	MAPK1:flank.sv:1	0.0992363
TOP3B:flank.sv	0.0130834	2.306	complx_interchr	High Activity	TOP3B:flank.sv:1	0.0992363
MYC:ExChr_amp	0.0135506	2.85677	complx_interchr	High Activity	MYC:ExChr_amp:1	0.0992363
CCDC26:ExChr_amp	0.0135506	2.85677	complx_interchr	High Activity	CCDC26:ExChr_amp:1	0.0992363
SPECC1:part.amp	0.0147181	2.32845	complx_interchr	High Activity	SPECC1:part.amp:1	0.105541
KDM5C:flank.sv	0.0155517	2.16408	complx_interchr	High Activity	KDM5C:flank.sv:1	0.109243
APEX2:flank.sv	0.0155517	2.16408	complx_interchr	High Activity	APEX2:flank.sv:1	0.109243
SPECC1:coding.sv	0.0175532	2.85233	complx_interchr	High Activity	SPECC1:coding.sv:1	0.116188
TEC:flank.sv	0.0190997	1.51508	complx_interchr	High Activity	TEC:flank.sv:1	0.120258
13q14.2_Del(RB1)	0.0200104	1.69217	complx_interchr	High Activity	13q14.2_Del(RB1):1	0.122876
KDM5A:flank.sv	0.0205185	2.2363	complx_interchr	High Activity	KDM5A:flank.sv:1	0.122876
RB1:coding.sv	0.0215218	2.04249	complx_interchr	High Activity	RB1:coding.sv:1	0.123053
EXT2:coding.sv	0.0223731	4.66754	complx_interchr	High Activity	EXT2:coding.sv:1	0.124254
17p11.2_Amp	0.0229854	1.97072	complx_interchr	High Activity	17p11.2_Amp:1	0.124254
POLR2E:flank.sv	0.0233984	2.57796	complx_interchr	High Activity	POLR2E:flank.sv:1	0.124254
STK11:flank.sv	0.0233984	2.57796	complx_interchr	High Activity	STK11:flank.sv:1	0.124254
HUS1:part.amp	0.0279937	2.55885	complx_interchr	High Activity	HUS1:part.amp:1	0.133546
H3F3A:p.K28M	0.0288425	1.56219	complx_interchr	High Activity	H3F3A:p.K28M:1	0.135376
ELMO2:coding.sv	0.0291157	2.12105	complx_interchr	High Activity	ELMO2:coding.sv:1	0.135696
COL2A1:flank.sv	0.032501	2.03127	complx_interchr	High Activity	COL2A1:flank.sv:1	0.143129
PDGFRA:part.amp	0.0327079	2.3959	complx_interchr	High Activity	PDGFRA:part.amp:1	0.143129
12p12.1_Amp	0.0340173	1.62058	complx_interchr	High Activity	12p12.1_Amp:1	0.14396
CNTNAP2:coding.sv	0.036018	2.82948	complx_interchr	High Activity	CNTNAP2:coding.sv:1	0.148176
CDK6:coding.sv	0.0392475	3.28605	complx_interchr	High Activity	CDK6:coding.sv:1	0.153781
MSI2:coding.sv	0.0496666	2.16574	complx_interchr	High Activity	MSI2:coding.sv:1	0.169912
CDH11:flank.sv	0.0499942	2.43316	complx_interchr	High Activity	CDH11:flank.sv:1	0.169912
CNBD1:flank.sv	0.0567641	2.12903	complx_interchr	High Activity	CNBD1:flank.sv:1	0.1826
PTPN6:coding.sv	0.060528	3.53253	complx_interchr	High Activity	PTPN6:coding.sv:1	0.189619
SHFM1:coding.sv	0.060599	2.09486	complx_interchr	High Activity	SHFM1:coding.sv:1	0.189619
ZNF479:flank.sv	0.0610237	1.9568	complx_interchr	High Activity	ZNF479:flank.sv:1	0.190305
TP53:truncating.snv	0.0658788	1.20103	complx_interchr	High Activity	TP53:truncating.snv:1	0.196608
8p23.1_Amp	0.0679669	1.93185	complx_interchr	High Activity	8p23.1_Amp:1	0.199321
NFIB:flank.sv	0.0732565	1.56408	complx_interchr	High Activity	NFIB:flank.sv:1	0.199917
EBF1:coding.sv	0.0764945	2.43011	complx_interchr	High Activity	EBF1:coding.sv:1	0.203047
MAP3K13:part.amp	0.0775122	2.65656	complx_interchr	High Activity	MAP3K13:part.amp:1	0.203047
MET:ExChr_amp	0.0777723	2.35216	complx_interchr	High Activity	MET:ExChr_amp:1	0.203047
NTRK3:coding.sv	0.0796085	1.99656	complx_interchr	High Activity	NTRK3:coding.sv:1	0.205509
CHIC2:flank.sv	0.0813491	1.44159	complx_interchr	High Activity	CHIC2:flank.sv:1	0.207126
MTNR1A:flank.sv	0.0831744	1.64923	complx_interchr	High Activity	MTNR1A:flank.sv:1	0.209354
FAT1:flank.sv	0.0831744	1.64923	complx_interchr	High Activity	FAT1:flank.sv:1	0.209354
DDB2:flank.sv	0.0882258	1.72384	complx_interchr	High Activity	DDB2:flank.sv:1	0.212877
5p15.33_Del	0.0888397	2.03329	complx_interchr	High Activity	5p15.33_Del:1	0.212877
17q11.2_Del(NF1)	0.0940065	1.68202	complx_interchr	High Activity	17q11.2_Del(NF1):1	0.217161
PTPRD:part.amp	0.0957397	2.34273	complx_interchr	High Activity	PTPRD:part.amp:1	0.218908
CHIC2:amp	0.0970946	1.84103	complx_interchr	High Activity	CHIC2:amp:1	0.218908
7q21.2_Amp(CDK6)	0.102736	1.4057	complx_interchr	High Activity	7q21.2_Amp(CDK6):1	0.22369
FIP1L1:coding.sv	0.105731	1.46035	complx_interchr	High Activity	FIP1L1:coding.sv:1	0.227822
HDAC2:flank.sv	0.109718	1.77689	complx_interchr	High Activity	HDAC2:flank.sv:1	0.230273
CNBD1:coding.sv	0.114076	1.85424	complx_interchr	High Activity	CNBD1:coding.sv:1	0.231938
20q13.33_Del_a	0.116463	1.53285	complx_interchr	High Activity	20q13.33_Del_a:1	0.231938
KDM5A:coding.sv	0.11875	1.46985	complx_interchr	High Activity	KDM5A:coding.sv:1	0.231938
ROBO2:part.amp	0.11984	1.70262	complx_interchr	High Activity	ROBO2:part.amp:1	0.231938
FIP1L1:intron.sv	0.123314	1.53207	complx_interchr	High Activity	FIP1L1:intron.sv:1	0.231938
IDH2:flank.sv	0.124242	1.65942	complx_interchr	High Activity	IDH2:flank.sv:1	0.232109
SMC6:flank.sv	0.128869	1.41788	complx_interchr	High Activity	SMC6:flank.sv:1	0.23321
14q12_Del	0.130314	1.40791	complx_interchr	High Activity	14q12_Del:1	0.23321
KMT2C:part.amp	0.135248	1.76351	complx_interchr	High Activity	KMT2C:part.amp:1	0.236863
CLOCK:coding.sv	0.136132	1.91024	complx_interchr	High Activity	CLOCK:coding.sv:1	0.236863
CSMD3:coding.sv	0.139041	1.50269	complx_interchr	High Activity	CSMD3:coding.sv:1	0.239289
OPCML:coding.sv	0.140158	3.26629	complx_interchr	High Activity	OPCML:coding.sv:1	0.240809
FRYL:truncating.snv	0.148643	1.60804	complx_interchr	High Activity	FRYL:truncating.snv:1	0.249574
ETV1:part.amp	0.155416	1.33384	complx_interchr	High Activity	ETV1:part.amp:1	0.252737
TP53:coding.sv	0.163165	1.85485	complx_interchr	High Activity	TP53:coding.sv:1	0.261621
SDHA:flank.sv	0.168513	1.37637	complx_interchr	High Activity	SDHA:flank.sv:1	0.267291
8q24.21_Amp(CCDC26)	0.178143	1.4742	complx_interchr	High Activity	8q24.21_Amp(CCDC26):1	0.274553
20q13.33_Del_b	0.209251	1.29765	complx_interchr	High Activity	20q13.33_Del_b:1	0.297598
AKAP9:ExChr_amp	0.224902	1.6698	complx_interchr	High Activity	AKAP9:ExChr_amp:1	0.307594
CDK6:ExChr_amp	0.224902	1.6698	complx_interchr	High Activity	CDK6:ExChr_amp:1	0.307594
LRP1B:intron.sv	0.226359	1.40702	complx_interchr	High Activity	LRP1B:intron.sv:1	0.309177
ATRX:coding.sv	0.230964	1.10943	complx_interchr	High Activity	ATRX:coding.sv:1	0.311787
MSI2:part.amp	0.243305	1.54475	complx_interchr	High Activity	MSI2:part.amp:1	0.3137
MET:coding.sv	0.269437	2.05382	complx_interchr	High Activity	MET:coding.sv:1	0.333997
7p11.2_Amp(EGFR)	0.271858	1.28747	complx_interchr	High Activity	7p11.2_Amp(EGFR):1	0.335967
FANCI:flank.sv	0.272939	1.49388	complx_interchr	High Activity	FANCI:flank.sv:1	0.335967
8q24.3_Del	0.274108	1.17377	complx_interchr	High Activity	8q24.3_Del:1	0.335967
CDKN2B:homdel	0.274531	1.26804	complx_interchr	High Activity	CDKN2B:homdel:1	0.335967
CDKN2A:homdel	0.274531	1.26804	complx_interchr	High Activity	CDKN2A:homdel:1	0.335967
PDGFRA:amp	0.278845	1.50472	complx_interchr	High Activity	PDGFRA:amp:1	0.339146
KIT:amp	0.278845	1.50472	complx_interchr	High Activity	KIT:amp:1	0.339146
WWOX:coding.sv	0.291205	2.3756	complx_interchr	High Activity	WWOX:coding.sv:1	0.346426
CCT7:missense.snv	0.291205	1.7788	complx_interchr	High Activity	CCT7:missense.snv:1	0.346426
7q31.2_Amp(MET)	0.30191	1.22641	complx_interchr	High Activity	7q31.2_Amp(MET):1	0.351071
GPHN:coding.sv	0.305685	1.18161	complx_interchr	High Activity	GPHN:coding.sv:1	0.353472
MAD1L1:coding.sv	0.338707	1.6421	complx_interchr	High Activity	MAD1L1:coding.sv:1	0.369483
TERT:flank.sv	0.338735	1.20265	complx_interchr	High Activity	TERT:flank.sv:1	0.369483
CHD8:flank.sv	0.36625	1.62026	complx_interchr	High Activity	CHD8:flank.sv:1	0.381624
PARP2:flank.sv	0.36625	1.62026	complx_interchr	High Activity	PARP2:flank.sv:1	0.381624
APEX1:flank.sv	0.36625	1.62026	complx_interchr	High Activity	APEX1:flank.sv:1	0.381624
NTRK2:coding.sv	0.370604	2.00486	complx_interchr	High Activity	NTRK2:coding.sv:1	0.383158
ERBB4:coding.sv	0.385133	1.2031	complx_interchr	High Activity	ERBB4:coding.sv:1	0.388572
PDGFRA:truncating.snv	0.394662	1.01728	complx_interchr	High Activity	PDGFRA:truncating.snv:1	0.390761
ATRX:truncating.snv	0.400775	1.03531	complx_interchr	High Activity	ATRX:truncating.snv:1	0.39301
KMT2C:coding.sv	0.411686	1.62252	complx_interchr	High Activity	KMT2C:coding.sv:1	0.393982
7p15.1_Amp	0.44479	1.14251	complx_interchr	High Activity	7p15.1_Amp:1	0.41008
MTAP:homdel	0.469862	1.21588	complx_interchr	High Activity	MTAP:homdel:1	0.421528
20q11.21_Amp	0.536361	1.14294	complx_interchr	High Activity	20q11.21_Amp:1	0.444639
ERC1:part.amp	0.557621	1.14242	complx_interchr	High Activity	ERC1:part.amp:1	0.449973
ADA:missense.snv	0.566222	1.50029	complx_interchr	High Activity	ADA:missense.snv:1	0.449973
AMER1:missense.snv	0.576951	1.14167	complx_interchr	High Activity	AMER1:missense.snv:1	0.450167
CLOCK:part.amp	0.599824	1.20794	complx_interchr	High Activity	CLOCK:part.amp:1	0.456767
CRTC3:missense.snv	0.599824	1.17131	complx_interchr	High Activity	CRTC3:missense.snv:1	0.456767
DROSHA:missense.snv	0.644095	1.01285	complx_interchr	High Activity	DROSHA:missense.snv:1	0.47514
KEAP1:missense.snv	0.644322	1.03652	complx_interchr	High Activity	KEAP1:missense.snv:1	0.47514
RGS7:part.amp	0.695081	1.44571	complx_interchr	High Activity	RGS7:part.amp:1	0.48959
IDH1:missense.snv	0.730415	1.61396	complx_interchr	High Activity	IDH1:missense.snv:1	0.501755
CCDC26:part.amp	0.748232	1.13443	complx_interchr	High Activity	CCDC26:part.amp:1	0.506216
TCF12:coding.sv	0.751555	1.25575	complx_interchr	High Activity	TCF12:coding.sv:1	0.507482
SH2B3:missense.snv	0.81207	1.45545	complx_interchr	High Activity	SH2B3:missense.snv:1	0.528715
ZNF676:missense.snv	0.851164	1.15213	complx_interchr	High Activity	ZNF676:missense.snv:1	0.54291
20q11.21_Del	0.943631	1.47734	complx_interchr	High Activity	20q11.21_Del:1	0.573172
PML:missense.snv	0.988489	1.01794	complx_interchr	High Activity	PML:missense.snv:1	0.583264
PPM1D:truncating.snv	0.000848715	9.99082018380356e-313	complx_interchr	Low Activity	PPM1D:truncating.snv:1	0.042708
ACVR1:missense.snv	0.00109214	0.216657	complx_interchr	Low Activity	ACVR1:missense.snv:1	0.0449657
HIST1H3B:p.K28M	0.00938275	0.26244	complx_interchr	Low Activity	HIST1H3B:p.K28M:1	0.0860153
PIK3CA:missense.snv	0.0267012	0.405523	complx_interchr	Low Activity	PIK3CA:missense.snv:1	0.132556
2p25.1_Amp(KIDINS220)	0.0310968	0.380025	complx_interchr	Low Activity	2p25.1_Amp(KIDINS220):1	0.140903
ANKRD11:truncating.snv	0.0725062	0	complx_interchr	Low Activity	ANKRD11:truncating.snv:1	0.199917
TCF12:missense.snv	0.0725062	0	complx_interchr	Low Activity	TCF12:missense.snv:1	0.199917
ATM:truncating.snv	0.0725062	0	complx_interchr	Low Activity	ATM:truncating.snv:1	0.199917
PTEN:missense.snv	0.0725062	0	complx_interchr	Low Activity	PTEN:missense.snv:1	0.199917
FAM47C:missense.snv	0.0725062	0	complx_interchr	Low Activity	FAM47C:missense.snv:1	0.199917
ACVR1:truncating.snv	0.0725062	0	complx_interchr	Low Activity	ACVR1:truncating.snv:1	0.199917
LRRC37B:missense.snv	0.0725062	0	complx_interchr	Low Activity	LRRC37B:missense.snv:1	0.199917
CCR7:missense.snv	0.0725062	0	complx_interchr	Low Activity	CCR7:missense.snv:1	0.199917
YY2:missense.snv	0.0725062	0	complx_interchr	Low Activity	YY2:missense.snv:1	0.199917
TUBG1:missense.snv	0.0725062	0	complx_interchr	Low Activity	TUBG1:missense.snv:1	0.199917
MTOR:missense.snv	0.0738449	3.29944e-90	complx_interchr	Low Activity	MTOR:missense.snv:1	0.199917
CLTCL1:missense.snv	0.0738449	3.29944e-90	complx_interchr	Low Activity	CLTCL1:missense.snv:1	0.199917
AKAP9:missense.snv	0.0738449	3.29944e-90	complx_interchr	Low Activity	AKAP9:missense.snv:1	0.199917
TYRO3:missense.snv	0.0738449	3.29944e-90	complx_interchr	Low Activity	TYRO3:missense.snv:1	0.199917
TERT:PROMOTER_snvs	0.0812386	0.0584599	complx_interchr	Low Activity	TERT:PROMOTER_snvs:1	0.207126
2p25.1_Amp	0.0984821	0.533896	complx_interchr	Low Activity	2p25.1_Amp:1	0.220995
FLG2:missense.snv	0.114922	0.192461	complx_interchr	Low Activity	FLG2:missense.snv:1	0.231938
AKT3:missense.snv	0.121316	0	complx_interchr	Low Activity	AKT3:missense.snv:1	0.231938
FBXW7:missense.snv	0.121316	0	complx_interchr	Low Activity	FBXW7:missense.snv:1	0.231938
AKT3:part.amp	0.121316	0	complx_interchr	Low Activity	AKT3:part.amp:1	0.231938
HIST1H3C:missense.snv	0.121316	0	complx_interchr	Low Activity	HIST1H3C:missense.snv:1	0.231938
SFRP4:part.amp	0.121316	0	complx_interchr	Low Activity	SFRP4:part.amp:1	0.231938
MYO5A:missense.snv	0.121502	3.98262e-90	complx_interchr	Low Activity	MYO5A:missense.snv:1	0.231938
BCLAF1:missense.snv	0.121502	3.98262e-90	complx_interchr	Low Activity	BCLAF1:missense.snv:1	0.231938
MTNR1A:missense.snv	0.121502	3.98262e-90	complx_interchr	Low Activity	MTNR1A:missense.snv:1	0.231938
CTNNA2:missense.snv	0.121502	3.98262e-90	complx_interchr	Low Activity	CTNNA2:missense.snv:1	0.231938
IRS2:missense.snv	0.121502	3.98262e-90	complx_interchr	Low Activity	IRS2:missense.snv:1	0.231938
PTPRB:missense.snv	0.121502	3.98262e-90	complx_interchr	Low Activity	PTPRB:missense.snv:1	0.231938
SELE:missense.snv	0.121502	3.98262e-90	complx_interchr	Low Activity	SELE:missense.snv:1	0.231938
DNMBP:missense.snv	0.121502	3.98262e-90	complx_interchr	Low Activity	DNMBP:missense.snv:1	0.231938
ATP8B3:missense.snv	0.123244	0.085992	complx_interchr	Low Activity	ATP8B3:missense.snv:1	0.231938
ANK1:missense.snv	0.135636	0.120371	complx_interchr	Low Activity	ANK1:missense.snv:1	0.236863
ALMS1:missense.snv	0.151286	0.165173	complx_interchr	Low Activity	ALMS1:missense.snv:1	0.250865
2p24.3_Amp(MYCN)	0.152347	0.573849	complx_interchr	Low Activity	2p24.3_Amp(MYCN):1	0.251226
KMT2C:missense.snv	0.168276	0.183319	complx_interchr	Low Activity	KMT2C:missense.snv:1	0.267291
COL1A1:missense.snv	0.169534	0.314517	complx_interchr	Low Activity	COL1A1:missense.snv:1	0.267677
PDE4DIP:missense.snv	0.176475	0.0193146	complx_interchr	Low Activity	PDE4DIP:missense.snv:1	0.27344
PRDM2:missense.snv	0.17931	0.0442766	complx_interchr	Low Activity	PRDM2:missense.snv:1	0.27512
CTCF:missense.snv	0.184415	0.239148	complx_interchr	Low Activity	CTCF:missense.snv:1	0.279627
RB1:missense.snv	0.188018	0.0584599	complx_interchr	Low Activity	RB1:missense.snv:1	0.283841
PTPN11:missense.snv	0.1883	0.377967	complx_interchr	Low Activity	PTPN11:missense.snv:1	0.283851
ZNF292:missense.snv	0.189401	0.228011	complx_interchr	Low Activity	ZNF292:missense.snv:1	0.285095
CHD2:missense.snv	0.201987	5.00739e-90	complx_interchr	Low Activity	CHD2:missense.snv:1	0.295426
CHD8:truncating.snv	0.201987	5.00739e-90	complx_interchr	Low Activity	CHD8:truncating.snv:1	0.295426
TCF7L2:missense.snv	0.201987	5.00739e-90	complx_interchr	Low Activity	TCF7L2:missense.snv:1	0.295426
MUC4:missense.snv	0.201987	5.00739e-90	complx_interchr	Low Activity	MUC4:missense.snv:1	0.295426
NCOA1:missense.snv	0.206484	0.253215	complx_interchr	Low Activity	NCOA1:missense.snv:1	0.297435
TDG:coding.sv	0.208094	0	complx_interchr	Low Activity	TDG:coding.sv:1	0.297435
FLG2:amp	0.208094	0	complx_interchr	Low Activity	FLG2:amp:1	0.297435
CDKN2C:missense.snv	0.208094	0	complx_interchr	Low Activity	CDKN2C:missense.snv:1	0.297435
PDGFRA:missense.snv	0.242638	0.421462	complx_interchr	Low Activity	PDGFRA:missense.snv:1	0.3137
NOTCH1:missense.snv	0.243949	0.337316	complx_interchr	Low Activity	NOTCH1:missense.snv:1	0.3137
RERE:missense.snv	0.243949	0.337316	complx_interchr	Low Activity	RERE:missense.snv:1	0.3137
WNK2:missense.snv	0.265309	0.215138	complx_interchr	Low Activity	WNK2:missense.snv:1	0.329672
NOTCH2:part.amp	0.265888	0.535983	complx_interchr	Low Activity	NOTCH2:part.amp:1	0.329994
FAF1:coding.sv	0.27681	0.25967	complx_interchr	Low Activity	FAF1:coding.sv:1	0.337558
KMT2A:truncating.snv	0.283537	0.0233139	complx_interchr	Low Activity	KMT2A:truncating.snv:1	0.342433
DIS3L2:missense.snv	0.283537	0.0233139	complx_interchr	Low Activity	DIS3L2:missense.snv:1	0.342433
BIRC6:missense.snv	0.284663	0.25967	complx_interchr	Low Activity	BIRC6:missense.snv:1	0.34299
SETD2:truncating.snv	0.286284	0.311564	complx_interchr	Low Activity	SETD2:truncating.snv:1	0.34374
ANKRD11:missense.snv	0.300378	0.308123	complx_interchr	Low Activity	ANKRD11:missense.snv:1	0.350898
DLC1:missense.snv	0.301166	0.0705646	complx_interchr	Low Activity	DLC1:missense.snv:1	0.350898
ANKRD52:missense.snv	0.30342	0.477831	complx_interchr	Low Activity	ANKRD52:missense.snv:1	0.352159
DICER1:missense.snv	0.305685	0.079097	complx_interchr	Low Activity	DICER1:missense.snv:1	0.353472
CDC27:missense.snv	0.309121	0.283362	complx_interchr	Low Activity	CDC27:missense.snv:1	0.356646
LIFR:missense.snv	0.314858	0.121814	complx_interchr	Low Activity	LIFR:missense.snv:1	0.360445
MAX:missense.snv	0.318696	0.322652	complx_interchr	Low Activity	MAX:missense.snv:1	0.362035
ARID1A:missense.snv	0.321856	0.297166	complx_interchr	Low Activity	ARID1A:missense.snv:1	0.362035
NCOR2:missense.snv	0.321856	0.297166	complx_interchr	Low Activity	NCOR2:missense.snv:1	0.362035
FAT4:missense.snv	0.321856	0.297166	complx_interchr	Low Activity	FAT4:missense.snv:1	0.362035
17q25.3_Del	0.32915	0.546739	complx_interchr	Low Activity	17q25.3_Del:1	0.366969
HIST1H3B:p.R27R	0.329441	5.3677387943475e-312	complx_interchr	Low Activity	HIST1H3B:p.R27R:1	0.366969
SETD2:missense.snv	0.330543	0.200028	complx_interchr	Low Activity	SETD2:missense.snv:1	0.367008
DNMT3A:missense.snv	0.330543	0.200028	complx_interchr	Low Activity	DNMT3A:missense.snv:1	0.367008
ZNF331:missense.snv	0.341833	6.71533e-90	complx_interchr	Low Activity	ZNF331:missense.snv:1	0.369483
ARID1B:truncating.snv	0.341833	6.71533e-90	complx_interchr	Low Activity	ARID1B:truncating.snv:1	0.369483
BCL11A:missense.snv	0.341833	6.71533e-90	complx_interchr	Low Activity	BCL11A:missense.snv:1	0.369483
MYH11:missense.snv	0.35329	0.381891	complx_interchr	Low Activity	MYH11:missense.snv:1	0.375316
PABPC1:missense.snv	0.360869	0.601061	complx_interchr	Low Activity	PABPC1:missense.snv:1	0.379077
IGF2R:missense.snv	0.364527	0.518483	complx_interchr	Low Activity	IGF2R:missense.snv:1	0.380982
UBR5:missense.snv	0.366742	0.378584	complx_interchr	Low Activity	UBR5:missense.snv:1	0.381751
KMT2D:truncating.snv	0.367498	0.115757	complx_interchr	Low Activity	KMT2D:truncating.snv:1	0.382152
MUC16:missense.snv	0.372403	0.732117	complx_interchr	Low Activity	MUC16:missense.snv:1	0.383158
APC:missense.snv	0.376167	0.395864	complx_interchr	Low Activity	APC:missense.snv:1	0.383158
MED23:missense.snv	0.376167	0.395864	complx_interchr	Low Activity	MED23:missense.snv:1	0.383158
ARID1B:missense.snv	0.376167	0.395864	complx_interchr	Low Activity	ARID1B:missense.snv:1	0.383158
SETD1B:missense.snv	0.376167	0.395864	complx_interchr	Low Activity	SETD1B:missense.snv:1	0.383158
CUX1:missense.snv	0.376167	0.395864	complx_interchr	Low Activity	CUX1:missense.snv:1	0.383158
ERC1:missense.snv	0.376167	0.395864	complx_interchr	Low Activity	ERC1:missense.snv:1	0.383158
BRAF:missense.snv	0.37767	0.47227	complx_interchr	Low Activity	BRAF:missense.snv:1	0.383839
ARHGAP26:missense.snv	0.389342	0.239148	complx_interchr	Low Activity	ARHGAP26:missense.snv:1	0.39007
MAP3K1:missense.snv	0.389342	0.239148	complx_interchr	Low Activity	MAP3K1:missense.snv:1	0.39007
RLIM:missense.snv	0.39433	0.205397	complx_interchr	Low Activity	RLIM:missense.snv:1	0.390761
ZNF292:truncating.snv	0.394662	0.24622	complx_interchr	Low Activity	ZNF292:truncating.snv:1	0.390761
RNF213:missense.snv	0.395118	0.291739	complx_interchr	Low Activity	RNF213:missense.snv:1	0.390761
NF1:missense.snv	0.395118	0.274426	complx_interchr	Low Activity	NF1:missense.snv:1	0.390761
BCOR:truncating.snv	0.398048	0.361097	complx_interchr	Low Activity	BCOR:truncating.snv:1	0.391824
PRKD1:missense.snv	0.407388	0.457365	complx_interchr	Low Activity	PRKD1:missense.snv:1	0.393982
ARHGEF10:missense.snv	0.416378	0.259684	complx_interchr	Low Activity	ARHGEF10:missense.snv:1	0.395584
CTNND2:missense.snv	0.416378	0.259684	complx_interchr	Low Activity	CTNND2:missense.snv:1	0.395584
H3F3A:missense.snv	0.416425	0.485866	complx_interchr	Low Activity	H3F3A:missense.snv:1	0.395584
STAG2:missense.snv	0.441	0.509955	complx_interchr	Low Activity	STAG2:missense.snv:1	0.408084
CUL4A:missense.snv	0.444491	0.313437	complx_interchr	Low Activity	CUL4A:missense.snv:1	0.41008
PLCG1:missense.snv	0.456166	0.0293128	complx_interchr	Low Activity	PLCG1:missense.snv:1	0.415009
GPC3:missense.snv	0.456166	0.0293128	complx_interchr	Low Activity	GPC3:missense.snv:1	0.415009
MCM7:missense.snv	0.456166	0.0293128	complx_interchr	Low Activity	MCM7:missense.snv:1	0.415009
ATR:missense.snv	0.461866	0.322994	complx_interchr	Low Activity	ATR:missense.snv:1	0.41872
ZNF133:missense.snv	0.479614	0.342035	complx_interchr	Low Activity	ZNF133:missense.snv:1	0.424138
KMT2A:missense.snv	0.479614	0.342035	complx_interchr	Low Activity	KMT2A:missense.snv:1	0.424138
PTPRT:missense.snv	0.479614	0.342035	complx_interchr	Low Activity	PTPRT:missense.snv:1	0.424138
NOTCH2:missense.snv	0.497728	0.358696	complx_interchr	Low Activity	NOTCH2:missense.snv:1	0.430453
NCKAP1:missense.snv	0.497728	0.358696	complx_interchr	Low Activity	NCKAP1:missense.snv:1	0.430453
TET2:missense.snv	0.497728	0.358696	complx_interchr	Low Activity	TET2:missense.snv:1	0.430453
ASXL1:truncating.snv	0.503612	0.920604	complx_interchr	Low Activity	ASXL1:truncating.snv:1	0.431559
KRAS:missense.snv	0.506204	0.62066	complx_interchr	Low Activity	KRAS:missense.snv:1	0.43157
LRP1B:coding.sv	0.506968	0.893839	complx_interchr	Low Activity	LRP1B:coding.sv:1	0.43157
MED12:missense.snv	0.507773	0.460814	complx_interchr	Low Activity	MED12:missense.snv:1	0.431894
FRYL:missense.snv	0.523618	0.440415	complx_interchr	Low Activity	FRYL:missense.snv:1	0.438158
FN1:missense.snv	0.523618	0.440415	complx_interchr	Low Activity	FN1:missense.snv:1	0.438158
MYC:flank.sv	0.547394	0.877658	complx_interchr	Low Activity	MYC:flank.sv:1	0.446123
FGFR1:missense.snv	0.55605	0.483649	complx_interchr	Low Activity	FGFR1:missense.snv:1	0.449973
SETD1B:truncating.snv	0.558155	0.948001	complx_interchr	Low Activity	SETD1B:truncating.snv:1	0.449973
RALGDS:missense.snv	0.573671	0.477831	complx_interchr	Low Activity	RALGDS:missense.snv:1	0.449973
SPEN:missense.snv	0.573671	0.477831	complx_interchr	Low Activity	SPEN:missense.snv:1	0.449973
POLD1:missense.snv	0.573671	0.477831	complx_interchr	Low Activity	POLD1:missense.snv:1	0.449973
MUC20:missense.snv	0.573671	0.477831	complx_interchr	Low Activity	MUC20:missense.snv:1	0.449973
RANBP2:missense.snv	0.573671	0.477831	complx_interchr	Low Activity	RANBP2:missense.snv:1	0.449973
EGFR:missense.snv	0.576151	0.583713	complx_interchr	Low Activity	EGFR:missense.snv:1	0.450167
RALGAPB:missense.snv	0.578202	0.510862	complx_interchr	Low Activity	RALGAPB:missense.snv:1	0.450167
SETBP1:missense.snv	0.579056	0.380598	complx_interchr	Low Activity	SETBP1:missense.snv:1	0.450167
STAT3:missense.snv	0.580239	0.485471	complx_interchr	Low Activity	STAT3:missense.snv:1	0.450167
PDGFRL:missense.snv	0.595601	0.294183	complx_interchr	Low Activity	PDGFRL:missense.snv:1	0.454558
CCDC26:coding.sv	0.61655	0.909917	complx_interchr	Low Activity	CCDC26:coding.sv:1	0.464368
NF1:truncating.snv	0.630313	0.93473	complx_interchr	Low Activity	NF1:truncating.snv:1	0.472297
ANKRD11:part.amp	0.638996	0.576725	complx_interchr	Low Activity	ANKRD11:part.amp:1	0.475037
CSNK1G3:coding.sv	0.638996	0.576725	complx_interchr	Low Activity	CSNK1G3:coding.sv:1	0.475037
REV3L:missense.snv	0.64703	0.576087	complx_interchr	Low Activity	REV3L:missense.snv:1	0.47514
NTRK3:missense.snv	0.648618	0.326504	complx_interchr	Low Activity	NTRK3:missense.snv:1	0.47514
SETD1A:missense.snv	0.659141	0.458902	complx_interchr	Low Activity	SETD1A:missense.snv:1	0.480892
KMT2C:truncating.snv	0.664115	0.360395	complx_interchr	Low Activity	KMT2C:truncating.snv:1	0.482228
TGM4:missense.snv	0.668012	0.773353	complx_interchr	Low Activity	TGM4:missense.snv:1	0.48296
TRRAP:missense.snv	0.670701	0.597694	complx_interchr	Low Activity	TRRAP:missense.snv:1	0.48296
LRP1B:missense.snv	0.670701	0.597694	complx_interchr	Low Activity	LRP1B:missense.snv:1	0.48296
PBRM1:truncating.snv	0.675667	0.621595	complx_interchr	Low Activity	PBRM1:truncating.snv:1	0.485182
ATRX:missense.snv	0.679186	0.978997	complx_interchr	Low Activity	ATRX:missense.snv:1	0.485506
DDB1:missense.snv	0.682663	0.604451	complx_interchr	Low Activity	DDB1:missense.snv:1	0.485849
NCOR1:missense.snv	0.682712	0.68346	complx_interchr	Low Activity	NCOR1:missense.snv:1	0.485849
CNTNAP2:part.amp	0.682712	0.665251	complx_interchr	Low Activity	CNTNAP2:part.amp:1	0.485849
PTEN:coding.sv	0.697379	0.988235	complx_interchr	Low Activity	PTEN:coding.sv:1	0.490539
PDGFRA:coding.sv	0.707461	0.74907	complx_interchr	Low Activity	PDGFRA:coding.sv:1	0.493596
9p21.3_Del(CDKN2A)	0.717851	0.896507	complx_interchr	Low Activity	9p21.3_Del(CDKN2A):1	0.498488
TOP1:missense.snv	0.735558	0.430044	complx_interchr	Low Activity	TOP1:missense.snv:1	0.502112
CSF1R:missense.snv	0.735558	0.430044	complx_interchr	Low Activity	CSF1R:missense.snv:1	0.502112
SMARCA4:missense.snv	0.735712	0.325791	complx_interchr	Low Activity	SMARCA4:missense.snv:1	0.502112
NF1:coding.sv	0.741236	0.886595	complx_interchr	Low Activity	NF1:coding.sv:1	0.503221
ALK:coding.sv	0.752919	0.860637	complx_interchr	Low Activity	ALK:coding.sv:1	0.507482
POT1:missense.snv	0.759928	0.450992	complx_interchr	Low Activity	POT1:missense.snv:1	0.507845
TET1:missense.snv	0.759928	0.450992	complx_interchr	Low Activity	TET1:missense.snv:1	0.507845
INPPL1:missense.snv	0.759928	0.450992	complx_interchr	Low Activity	INPPL1:missense.snv:1	0.507845
WWOX:missense.snv	0.762311	0.805699	complx_interchr	Low Activity	WWOX:missense.snv:1	0.507845
TFDP2:truncating.snv	0.762311	0.805699	complx_interchr	Low Activity	TFDP2:truncating.snv:1	0.507845
ARID2:truncating.snv	0.762311	0.805699	complx_interchr	Low Activity	ARID2:truncating.snv:1	0.507845
ELMO2:truncating.snv	0.762311	0.823823	complx_interchr	Low Activity	ELMO2:truncating.snv:1	0.507845
PPFIA1:missense.snv	0.778108	0.557772	complx_interchr	Low Activity	PPFIA1:missense.snv:1	0.513722
PTPRD:truncating.snv	0.791915	0.179506	complx_interchr	Low Activity	PTPRD:truncating.snv:1	0.519193
BCORL1:truncating.snv	0.800215	0.205397	complx_interchr	Low Activity	BCORL1:truncating.snv:1	0.522933
PTEN:truncating.snv	0.840433	0.59265	complx_interchr	Low Activity	PTEN:truncating.snv:1	0.539695
ESR1:missense.snv	0.848256	0.28689	complx_interchr	Low Activity	ESR1:missense.snv:1	0.542022
TERT:missense.snv	0.859577	0.600782	complx_interchr	Low Activity	TERT:missense.snv:1	0.544601
EYA1:missense.snv	0.859577	0.600782	complx_interchr	Low Activity	EYA1:missense.snv:1	0.544601
SMC6:ExChr_amp	0.860203	0.964482	complx_interchr	Low Activity	SMC6:ExChr_amp:1	0.544601
MYCN:ExChr_amp	0.860203	0.964482	complx_interchr	Low Activity	MYCN:ExChr_amp:1	0.544601
LIG1:missense.snv	0.873908	0.846674	complx_interchr	Low Activity	LIG1:missense.snv:1	0.550913
MGA:truncating.snv	0.910363	0.696226	complx_interchr	Low Activity	MGA:truncating.snv:1	0.564249
4q35.1_Del	0.921352	0.776916	complx_interchr	Low Activity	4q35.1_Del:1	0.567626
PIK3R1:missense.snv	0.933986	0.832403	complx_interchr	Low Activity	PIK3R1:missense.snv:1	0.571684
RGPD3:missense.snv	0.935908	0.730261	complx_interchr	Low Activity	RGPD3:missense.snv:1	0.572182
ID2:ExChr_amp	0.935908	0.915693	complx_interchr	Low Activity	ID2:ExChr_amp:1	0.572182
15q13.3_Del	0.952762	0.854559	complx_interchr	Low Activity	15q13.3_Del:1	0.57567
MET:part.amp	0.963926	0.870089	complx_interchr	Low Activity	MET:part.amp:1	0.577555
CTNND1:coding.sv	0.963926	0.870089	complx_interchr	Low Activity	CTNND1:coding.sv:1	0.577555
TSPAN16:missense.snv	0.97538	0.519408	complx_interchr	Low Activity	TSPAN16:missense.snv:1	0.580252
DCC:coding.sv	0.975946	0.79734	complx_interchr	Low Activity	DCC:coding.sv:1	0.580252
PTPRK:missense.snv	0.992974	0.793565	complx_interchr	Low Activity	PTPRK:missense.snv:1	0.583382
TDP2:missense.snv	0.995075	0.437869	complx_interchr	Low Activity	TDP2:missense.snv:1	0.583382
BIRC6:truncating.snv	0.995075	0.437869	complx_interchr	Low Activity	BIRC6:truncating.snv:1	0.583382
10q26.3_Del(MGMT)	2.82827e-05	1.88742	complx_large	High Activity	10q26.3_Del(MGMT):5	0.00730117
10q23.31_Del(PTEN)	4.29397e-05	1.99941	complx_large	High Activity	10q23.31_Del(PTEN):5	0.00886789
17p13.3_Del(TP53)	9.40033e-05	1.7837	complx_large	High Activity	17p13.3_Del(TP53):5	0.0157141
9p21.3_Del(CDKN2A)	0.000106526	2.19948	complx_large	High Activity	9p21.3_Del(CDKN2A):5	0.0157141
TP53:missense.snv	0.000156184	1.65122	complx_large	High Activity	TP53:missense.snv:5	0.0180734
PTPRD:coding.sv	0.000264798	2.46993	complx_large	High Activity	PTPRD:coding.sv:5	0.0210331
SMC6:flank.sv	0.000532893	2.41961	complx_large	High Activity	SMC6:flank.sv:5	0.0323685
SMC6:ExChr_amp	0.000951276	2.81391	complx_large	High Activity	SMC6:ExChr_amp:5	0.042708
MYCN:ExChr_amp	0.000951276	2.81391	complx_large	High Activity	MYCN:ExChr_amp:5	0.042708
MLLT3:flank.sv	0.00336197	2.0172	complx_large	High Activity	MLLT3:flank.sv:5	0.0642785
ID2:ExChr_amp	0.0034767	3.05554	complx_large	High Activity	ID2:ExChr_amp:5	0.0642785
KDR:flank.sv	0.00357167	2.05447	complx_large	High Activity	KDR:flank.sv:5	0.0642785
19q13.43_Del	0.00409932	1.5905	complx_large	High Activity	19q13.43_Del:5	0.0647116
CLOCK:flank.sv	0.00454896	1.96791	complx_large	High Activity	CLOCK:flank.sv:5	0.0652395
CDKN2B:homdel	0.00653821	1.78687	complx_large	High Activity	CDKN2B:homdel:5	0.0774313
CDKN2A:homdel	0.00653821	1.78687	complx_large	High Activity	CDKN2A:homdel:5	0.0774313
PTPRD:flank.sv	0.00748347	1.82654	complx_large	High Activity	PTPRD:flank.sv:5	0.079664
ELMO2:coding.sv	0.00788567	2.58633	complx_large	High Activity	ELMO2:coding.sv:5	0.0813981
4q12_Amp(PDGFRA)	0.0102974	1.72854	complx_large	High Activity	4q12_Amp(PDGFRA):5	0.0906666
EGFR:ExChr_amp	0.0109361	2.5174	complx_large	High Activity	EGFR:ExChr_amp:5	0.0906666
EGFR:coding.sv	0.0109361	2.5174	complx_large	High Activity	EGFR:coding.sv:5	0.0906666
FIP1L1:part.amp	0.0131852	1.85817	complx_large	High Activity	FIP1L1:part.amp:5	0.0992363
7q21.2_Amp(CDK6)	0.0179238	1.51339	complx_large	High Activity	7q21.2_Amp(CDK6):5	0.117886
TEC:flank.sv	0.0182405	1.8824	complx_large	High Activity	TEC:flank.sv:5	0.117901
MET:flank.sv	0.0186175	1.85929	complx_large	High Activity	MET:flank.sv:5	0.118669
15q13.3_Del	0.0215695	1.65567	complx_large	High Activity	15q13.3_Del:5	0.123053
COL2A1:flank.sv	0.0240926	1.84366	complx_large	High Activity	COL2A1:flank.sv:5	0.125646
13q14.2_Del(RB1)	0.0250291	1.36191	complx_large	High Activity	13q14.2_Del(RB1):5	0.128582
SDHA:flank.sv	0.0257909	2.0489	complx_large	High Activity	SDHA:flank.sv:5	0.130547
TP53:truncating.snv	0.0261915	1.46663	complx_large	High Activity	TP53:truncating.snv:5	0.131288
CTNND1:flank.sv	0.0269915	1.84761	complx_large	High Activity	CTNND1:flank.sv:5	0.132662
MTAP:flank.sv	0.0280646	1.72168	complx_large	High Activity	MTAP:flank.sv:5	0.133546
GPC5:coding.sv	0.0302076	2.31535	complx_large	High Activity	GPC5:coding.sv:5	0.138929
MLLT3:coding.sv	0.0305941	1.96578	complx_large	High Activity	MLLT3:coding.sv:5	0.139785
LSM14A:flank.sv	0.0348649	1.5567	complx_large	High Activity	LSM14A:flank.sv:5	0.145755
8q24.21_Amp(MYC)	0.0393167	1.46249	complx_large	High Activity	8q24.21_Amp(MYC):5	0.153781
MTAP:homdel	0.0400352	1.58518	complx_large	High Activity	MTAP:homdel:5	0.155414
APEX2:flank.sv	0.041783	1.67893	complx_large	High Activity	APEX2:flank.sv:5	0.159237
KDM5C:flank.sv	0.041783	1.67893	complx_large	High Activity	KDM5C:flank.sv:5	0.159237
EGFR:flank.sv	0.0427448	1.92777	complx_large	High Activity	EGFR:flank.sv:5	0.160567
PTEN:coding.sv	0.043403	2.36367	complx_large	High Activity	PTEN:coding.sv:5	0.161215
HLF:flank.sv	0.0442702	1.70978	complx_large	High Activity	HLF:flank.sv:5	0.162104
8p23.2_Del	0.0451276	1.54724	complx_large	High Activity	8p23.2_Del:5	0.16466
SETD1B:truncating.snv	0.0457372	1.8732	complx_large	High Activity	SETD1B:truncating.snv:5	0.165332
MAP2K4:coding.sv	0.0458986	2.31347	complx_large	High Activity	MAP2K4:coding.sv:5	0.165332
MET:ExChr_amp	0.0472815	2.21089	complx_large	High Activity	MET:ExChr_amp:5	0.16684
ATRX:truncating.snv	0.054969	1.43344	complx_large	High Activity	ATRX:truncating.snv:5	0.179234
MTNR1A:flank.sv	0.0551972	1.63309	complx_large	High Activity	MTNR1A:flank.sv:5	0.179234
FAT1:flank.sv	0.0551972	1.63309	complx_large	High Activity	FAT1:flank.sv:5	0.179234
ELANE:flank.sv	0.0577404	1.56878	complx_large	High Activity	ELANE:flank.sv:5	0.18459
FSTL3:flank.sv	0.0577404	1.56878	complx_large	High Activity	FSTL3:flank.sv:5	0.18459
TP53:coding.sv	0.0593181	2.44931	complx_large	High Activity	TP53:coding.sv:5	0.187889
TERT:flank.sv	0.0619373	1.95439	complx_large	High Activity	TERT:flank.sv:5	0.190914
CDK6:ExChr_amp	0.0696587	2.7253	complx_large	High Activity	CDK6:ExChr_amp:5	0.199917
AKAP9:ExChr_amp	0.0696587	2.7253	complx_large	High Activity	AKAP9:ExChr_amp:5	0.199917
PRKD1:coding.sv	0.0734567	1.91171	complx_large	High Activity	PRKD1:coding.sv:5	0.199917
NF1:truncating.snv	0.0758755	1.65262	complx_large	High Activity	NF1:truncating.snv:5	0.203047
CLOCK:part.amp	0.0761945	2.32003	complx_large	High Activity	CLOCK:part.amp:5	0.203047
12p12.1_Amp	0.0765018	1.45967	complx_large	High Activity	12p12.1_Amp:5	0.203047
NF1:coding.sv	0.0771521	1.97826	complx_large	High Activity	NF1:coding.sv:5	0.203047
7p11.2_Amp(EGFR)	0.078338	1.3899	complx_large	High Activity	7p11.2_Amp(EGFR):5	0.203338
SPECC1:part.amp	0.0785122	1.89612	complx_large	High Activity	SPECC1:part.amp:5	0.203338
CTNNA2:flank.sv	0.0814385	1.60127	complx_large	High Activity	CTNNA2:flank.sv:5	0.207126
CCDC26:flank.sv	0.0856999	1.4989	complx_large	High Activity	CCDC26:flank.sv:5	0.212725
KDM5A:flank.sv	0.0877135	1.68978	complx_large	High Activity	KDM5A:flank.sv:5	0.212877
MET:coding.sv	0.0894721	2.02686	complx_large	High Activity	MET:coding.sv:5	0.212877
7p15.1_Amp	0.0903452	1.40216	complx_large	High Activity	7p15.1_Amp:5	0.213968
7q31.2_Amp(MET)	0.091546	1.35083	complx_large	High Activity	7q31.2_Amp(MET):5	0.214814
17p11.2_Amp	0.0917651	1.68553	complx_large	High Activity	17p11.2_Amp:5	0.214814
CDK6:coding.sv	0.0954114	2.22576	complx_large	High Activity	CDK6:coding.sv:5	0.218908
NFIB:flank.sv	0.0993305	1.52088	complx_large	High Activity	NFIB:flank.sv:5	0.220995
CLOCK:coding.sv	0.0995185	1.95211	complx_large	High Activity	CLOCK:coding.sv:5	0.220995
ERC1:coding.sv	0.101483	1.67886	complx_large	High Activity	ERC1:coding.sv:5	0.222931
STK11:flank.sv	0.102898	1.48534	complx_large	High Activity	STK11:flank.sv:5	0.22369
POLR2E:flank.sv	0.102898	1.48534	complx_large	High Activity	POLR2E:flank.sv:5	0.22369
17q11.2_Del(NF1)	0.105691	1.59514	complx_large	High Activity	17q11.2_Del(NF1):5	0.227822
MSI2:coding.sv	0.107659	1.92051	complx_large	High Activity	MSI2:coding.sv:5	0.229257
FIP1L1:flank.sv	0.10768	1.50086	complx_large	High Activity	FIP1L1:flank.sv:5	0.229257
PTPN6:coding.sv	0.113042	2.19222	complx_large	High Activity	PTPN6:coding.sv:5	0.231938
14q12_Del	0.117683	1.27606	complx_large	High Activity	14q12_Del:5	0.231938
IDH2:flank.sv	0.119798	1.46958	complx_large	High Activity	IDH2:flank.sv:5	0.231938
ROBO2:part.amp	0.121121	1.85885	complx_large	High Activity	ROBO2:part.amp:5	0.231938
ERC1:flank.sv	0.12166	1.47836	complx_large	High Activity	ERC1:flank.sv:5	0.231938
PDGFRA:ExChr_amp	0.123005	1.53146	complx_large	High Activity	PDGFRA:ExChr_amp:5	0.231938
FIP1L1:ExChr_amp	0.123005	1.53146	complx_large	High Activity	FIP1L1:ExChr_amp:5	0.231938
ATRX:missense.snv	0.128821	1.5848	complx_large	High Activity	ATRX:missense.snv:5	0.23321
ERC1:part.amp	0.142135	1.77818	complx_large	High Activity	ERC1:part.amp:5	0.242994
HUS1:part.amp	0.145353	1.8512	complx_large	High Activity	HUS1:part.amp:5	0.246352
CNTNAP2:part.amp	0.148297	1.59539	complx_large	High Activity	CNTNAP2:part.amp:5	0.249574
NDRG1:part.amp	0.151956	1.83764	complx_large	High Activity	NDRG1:part.amp:5	0.251055
RAD52:flank.sv	0.154198	1.38497	complx_large	High Activity	RAD52:flank.sv:5	0.252737
FIP1L1:coding.sv	0.158194	1.50883	complx_large	High Activity	FIP1L1:coding.sv:5	0.255635
NTRK2:coding.sv	0.173461	1.42594	complx_large	High Activity	NTRK2:coding.sv:5	0.271203
KIT:flank.sv	0.173869	1.39486	complx_large	High Activity	KIT:flank.sv:5	0.271203
PDGFRA:flank.sv	0.173869	1.39486	complx_large	High Activity	PDGFRA:flank.sv:5	0.271203
SOX2:flank.sv	0.177316	1.38299	complx_large	High Activity	SOX2:flank.sv:5	0.274096
20q11.21_Amp	0.178524	1.38499	complx_large	High Activity	20q11.21_Amp:5	0.274574
KIT:ExChr_amp	0.191475	1.46895	complx_large	High Activity	KIT:ExChr_amp:5	0.286545
TCF12:coding.sv	0.204381	1.96764	complx_large	High Activity	TCF12:coding.sv:5	0.296655
EXT2:coding.sv	0.204381	1.91857	complx_large	High Activity	EXT2:coding.sv:5	0.296655
LARP4B:flank.sv	0.20915	1.37201	complx_large	High Activity	LARP4B:flank.sv:5	0.297598
POLR2I:flank.sv	0.214197	1.44836	complx_large	High Activity	POLR2I:flank.sv:5	0.300516
H3F3A:p.K28M	0.215075	1.17351	complx_large	High Activity	H3F3A:p.K28M:5	0.301165
CHIC2:ExChr_amp	0.21748	1.43616	complx_large	High Activity	CHIC2:ExChr_amp:5	0.303063
KDR:ExChr_amp	0.229473	1.46209	complx_large	High Activity	KDR:ExChr_amp:5	0.311053
CLOCK:ExChr_amp	0.229473	1.46209	complx_large	High Activity	CLOCK:ExChr_amp:5	0.311053
CNTNAP2:coding.sv	0.230705	1.42909	complx_large	High Activity	CNTNAP2:coding.sv:5	0.311787
H3F3A:missense.snv	0.239645	1.35332	complx_large	High Activity	H3F3A:missense.snv:5	0.313499
NTRK3:coding.sv	0.240271	1.57003	complx_large	High Activity	NTRK3:coding.sv:5	0.313658
CHIC2:amp	0.24156	1.39742	complx_large	High Activity	CHIC2:amp:5	0.3137
ATRX:coding.sv	0.25127	1.35886	complx_large	High Activity	ATRX:coding.sv:5	0.320015
CCDC26:ExChr_amp	0.274786	1.57929	complx_large	High Activity	CCDC26:ExChr_amp:5	0.335967
MYC:ExChr_amp	0.274786	1.57929	complx_large	High Activity	MYC:ExChr_amp:5	0.335967
PDGFRA:part.amp	0.27998	1.51713	complx_large	High Activity	PDGFRA:part.amp:5	0.340126
DDB2:flank.sv	0.281361	1.42097	complx_large	High Activity	DDB2:flank.sv:5	0.341001
8q24.3_Del	0.300842	1.24838	complx_large	High Activity	8q24.3_Del:5	0.350898
FANCI:flank.sv	0.3009	1.21959	complx_large	High Activity	FANCI:flank.sv:5	0.350898
CNBD1:coding.sv	0.301421	1.56184	complx_large	High Activity	CNBD1:coding.sv:5	0.350898
OPCML:coding.sv	0.318201	1.54178	complx_large	High Activity	OPCML:coding.sv:5	0.362035
FRYL:truncating.snv	0.323927	1.44591	complx_large	High Activity	FRYL:truncating.snv:5	0.362784
PTPRD:part.amp	0.325927	1.69763	complx_large	High Activity	PTPRD:part.amp:5	0.364233
ALK:coding.sv	0.335581	1.44961	complx_large	High Activity	ALK:coding.sv:5	0.369483
ELMO2:truncating.snv	0.335581	1.41271	complx_large	High Activity	ELMO2:truncating.snv:5	0.369483
KDM5A:coding.sv	0.345457	1.33971	complx_large	High Activity	KDM5A:coding.sv:5	0.370748
KMT2C:part.amp	0.347501	1.50184	complx_large	High Activity	KMT2C:part.amp:5	0.370801
FXR1:flank.sv	0.356244	1.23724	complx_large	High Activity	FXR1:flank.sv:5	0.377289
HDAC2:flank.sv	0.377246	1.17092	complx_large	High Activity	HDAC2:flank.sv:5	0.383787
ERBB4:coding.sv	0.388774	1.22701	complx_large	High Activity	ERBB4:coding.sv:5	0.39007
SHFM1:coding.sv	0.391309	1.33359	complx_large	High Activity	SHFM1:coding.sv:5	0.390124
ZNF479:flank.sv	0.401896	1.25154	complx_large	High Activity	ZNF479:flank.sv:5	0.393362
PBRM1:truncating.snv	0.41811	1.34213	complx_large	High Activity	PBRM1:truncating.snv:5	0.396092
20q13.33_Del_a	0.434309	1.1876	complx_large	High Activity	20q13.33_Del_a:5	0.407147
AFF3:coding.sv	0.435244	1.22264	complx_large	High Activity	AFF3:coding.sv:5	0.407147
KIT:amp	0.453465	1.19438	complx_large	High Activity	KIT:amp:5	0.414011
PDGFRA:amp	0.453465	1.19438	complx_large	High Activity	PDGFRA:amp:5	0.414011
LIG1:missense.snv	0.467005	1.29435	complx_large	High Activity	LIG1:missense.snv:5	0.420426
MSI2:part.amp	0.47646	1.2032	complx_large	High Activity	MSI2:part.amp:5	0.423765
CTNND2:missense.snv	0.483981	1.2396	complx_large	High Activity	CTNND2:missense.snv:5	0.424643
RB1:coding.sv	0.486843	1.0998	complx_large	High Activity	RB1:coding.sv:5	0.424948
PDGFRA:truncating.snv	0.489714	1.23739	complx_large	High Activity	PDGFRA:truncating.snv:5	0.426372
BIRC6:truncating.snv	0.510787	1.1469	complx_large	High Activity	BIRC6:truncating.snv:5	0.43268
TDP2:missense.snv	0.510787	1.1469	complx_large	High Activity	TDP2:missense.snv:5	0.43268
TOP3B:flank.sv	0.513541	1.15122	complx_large	High Activity	TOP3B:flank.sv:5	0.434056
MAPK1:flank.sv	0.513541	1.15122	complx_large	High Activity	MAPK1:flank.sv:5	0.434056
CRTC3:missense.snv	0.525998	1.17662	complx_large	High Activity	CRTC3:missense.snv:5	0.439523
KMT2C:truncating.snv	0.537195	1.03732	complx_large	High Activity	KMT2C:truncating.snv:5	0.444695
POT1:missense.snv	0.543944	1.03586	complx_large	High Activity	POT1:missense.snv:5	0.444715
GPC3:missense.snv	0.543944	1.02076	complx_large	High Activity	GPC3:missense.snv:5	0.444715
TET1:missense.snv	0.543944	1.03586	complx_large	High Activity	TET1:missense.snv:5	0.444715
INPPL1:missense.snv	0.543944	1.03586	complx_large	High Activity	INPPL1:missense.snv:5	0.444715
NTRK3:missense.snv	0.557565	1.02546	complx_large	High Activity	NTRK3:missense.snv:5	0.449973
PML:missense.snv	0.561258	1.21795	complx_large	High Activity	PML:missense.snv:5	0.449973
APEX1:flank.sv	0.562273	1.33873	complx_large	High Activity	APEX1:flank.sv:5	0.449973
PARP2:flank.sv	0.562273	1.33873	complx_large	High Activity	PARP2:flank.sv:5	0.449973
CHD8:flank.sv	0.562273	1.33873	complx_large	High Activity	CHD8:flank.sv:5	0.449973
CCT7:missense.snv	0.589072	1.01675	complx_large	High Activity	CCT7:missense.snv:5	0.453397
SPECC1:coding.sv	0.592328	1.06741	complx_large	High Activity	SPECC1:coding.sv:5	0.453609
EBF1:coding.sv	0.600666	1.1626	complx_large	High Activity	EBF1:coding.sv:5	0.456952
LRP1B:coding.sv	0.601836	1.11936	complx_large	High Activity	LRP1B:coding.sv:5	0.456952
SETD2:missense.snv	0.610426	1.04262	complx_large	High Activity	SETD2:missense.snv:5	0.461235
FIP1L1:intron.sv	0.61525	1.12658	complx_large	High Activity	FIP1L1:intron.sv:5	0.463727
ETV1:part.amp	0.617239	1.25432	complx_large	High Activity	ETV1:part.amp:5	0.464548
BRAF:missense.snv	0.635265	1.29227	complx_large	High Activity	BRAF:missense.snv:5	0.473969
8p23.1_Amp	0.636494	1.14549	complx_large	High Activity	8p23.1_Amp:5	0.474417
4q35.1_Del	0.685917	1.0169	complx_large	High Activity	4q35.1_Del:5	0.487122
CDH11:flank.sv	0.690846	1.08396	complx_large	High Activity	CDH11:flank.sv:5	0.487605
ADA:missense.snv	0.705895	1.1246	complx_large	High Activity	ADA:missense.snv:5	0.492939
20q13.33_Del_b	0.734934	1.00538	complx_large	High Activity	20q13.33_Del_b:5	0.502112
6q25.2_Del	0.736911	1.03063	complx_large	High Activity	6q25.2_Del:5	0.502255
SFRP4:part.amp	0.737868	1.36109	complx_large	High Activity	SFRP4:part.amp:5	0.502255
RNF213:missense.snv	0.785442	1.10107	complx_large	High Activity	RNF213:missense.snv:5	0.51659
FN1:missense.snv	0.833661	1.02332	complx_large	High Activity	FN1:missense.snv:5	0.537003
FRYL:missense.snv	0.833661	1.02332	complx_large	High Activity	FRYL:missense.snv:5	0.537003
COL1A1:missense.snv	0.943238	1.07135	complx_large	High Activity	COL1A1:missense.snv:5	0.573172
PTEN:truncating.snv	0.967442	1.10403	complx_large	High Activity	PTEN:truncating.snv:5	0.578103
MAP3K13:part.amp	0.976579	1.00847	complx_large	High Activity	MAP3K13:part.amp:5	0.580252
KMT2C:coding.sv	0.985946	1.00559	complx_large	High Activity	KMT2C:coding.sv:5	0.582096
ACVR1:missense.snv	1.3157e-06	0.0830707	complx_large	Low Activity	ACVR1:missense.snv:5	0.000679295
HIST1H3B:p.K28M	0.000567906	0.236873	complx_large	Low Activity	HIST1H3B:p.K28M:5	0.0325788
PPM1D:truncating.snv	0.0011322	0.161903	complx_large	Low Activity	PPM1D:truncating.snv:5	0.0449657
TERT:PROMOTER_snvs	0.00577876	0	complx_large	Low Activity	TERT:PROMOTER_snvs:5	0.0765018
PIK3CA:missense.snv	0.0250171	0.563314	complx_large	Low Activity	PIK3CA:missense.snv:5	0.128582
MYC:flank.sv	0.0455425	0.507765	complx_large	Low Activity	MYC:flank.sv:5	0.165332
FBXW7:missense.snv	0.0533919	0	complx_large	Low Activity	FBXW7:missense.snv:5	0.175581
HIST1H3C:missense.snv	0.0533919	0	complx_large	Low Activity	HIST1H3C:missense.snv:5	0.175581
AKT3:part.amp	0.0533919	0	complx_large	Low Activity	AKT3:part.amp:5	0.175581
CCDC26:coding.sv	0.0634025	0.509617	complx_large	Low Activity	CCDC26:coding.sv:5	0.191992
ACVR1:truncating.snv	0.0811441	0.101775	complx_large	Low Activity	ACVR1:truncating.snv:5	0.207126
TCF12:missense.snv	0.0811441	0.101775	complx_large	Low Activity	TCF12:missense.snv:5	0.207126
ATM:truncating.snv	0.0964143	0.16367	complx_large	Low Activity	ATM:truncating.snv:5	0.218908
TUBG1:missense.snv	0.0964143	0.16367	complx_large	Low Activity	TUBG1:missense.snv:5	0.218908
ASXL1:truncating.snv	0.108689	0.442466	complx_large	Low Activity	ASXL1:truncating.snv:5	0.230273
TDG:coding.sv	0.116339	0	complx_large	Low Activity	TDG:coding.sv:5	0.231938
CTCF:missense.snv	0.120952	0.21174	complx_large	Low Activity	CTCF:missense.snv:5	0.231938
FLG2:missense.snv	0.122735	0.310575	complx_large	Low Activity	FLG2:missense.snv:5	0.231938
UBR5:missense.snv	0.123247	0.175418	complx_large	Low Activity	UBR5:missense.snv:5	0.231938
CLTCL1:missense.snv	0.123247	0.175418	complx_large	Low Activity	CLTCL1:missense.snv:5	0.231938
RB1:missense.snv	0.123247	0.175418	complx_large	Low Activity	RB1:missense.snv:5	0.231938
TYRO3:missense.snv	0.123247	0.175418	complx_large	Low Activity	TYRO3:missense.snv:5	0.231938
ATP8B3:missense.snv	0.126414	0.17765	complx_large	Low Activity	ATP8B3:missense.snv:5	0.232682
BCOR:truncating.snv	0.135181	0.425706	complx_large	Low Activity	BCOR:truncating.snv:5	0.236863
STAG2:missense.snv	0.138167	0.223266	complx_large	Low Activity	STAG2:missense.snv:5	0.239289
RLIM:missense.snv	0.151956	0.0664734	complx_large	Low Activity	RLIM:missense.snv:5	0.251055
2p25.1_Amp(KIDINS220)	0.152833	0.712104	complx_large	Low Activity	2p25.1_Amp(KIDINS220):5	0.251297
HIST1H3B:p.R27R	0.155342	0.0776937	complx_large	Low Activity	HIST1H3B:p.R27R:5	0.252737
FAF1:coding.sv	0.156881	0.279435	complx_large	Low Activity	FAF1:coding.sv:5	0.253911
20q11.21_Del	0.174437	0.0827908	complx_large	Low Activity	20q11.21_Del:5	0.271679
PIK3R1:missense.snv	0.200404	0.49596	complx_large	Low Activity	PIK3R1:missense.snv:5	0.295426
MTOR:missense.snv	0.210462	0.175418	complx_large	Low Activity	MTOR:missense.snv:5	0.29852
TCF7L2:missense.snv	0.211512	0.16367	complx_large	Low Activity	TCF7L2:missense.snv:5	0.299598
BCLAF1:missense.snv	0.237902	0.21174	complx_large	Low Activity	BCLAF1:missense.snv:5	0.312541
CTNNA2:missense.snv	0.237902	0.21174	complx_large	Low Activity	CTNNA2:missense.snv:5	0.312541
ZNF292:truncating.snv	0.237902	0.21174	complx_large	Low Activity	ZNF292:truncating.snv:5	0.312541
MAP3K1:missense.snv	0.237902	0.21174	complx_large	Low Activity	MAP3K1:missense.snv:5	0.312541
MTNR1A:missense.snv	0.237902	0.21174	complx_large	Low Activity	MTNR1A:missense.snv:5	0.312541
DNMBP:missense.snv	0.237902	0.21174	complx_large	Low Activity	DNMBP:missense.snv:5	0.312541
DLC1:missense.snv	0.237902	0.21174	complx_large	Low Activity	DLC1:missense.snv:5	0.312541
MYO5A:missense.snv	0.237902	0.21174	complx_large	Low Activity	MYO5A:missense.snv:5	0.312541
2p25.1_Amp	0.242269	0.768109	complx_large	Low Activity	2p25.1_Amp:5	0.3137
ANKRD11:truncating.snv	0.242878	0.266223	complx_large	Low Activity	ANKRD11:truncating.snv:5	0.3137
CCR7:missense.snv	0.242878	0.266223	complx_large	Low Activity	CCR7:missense.snv:5	0.3137
YY2:missense.snv	0.242878	0.266223	complx_large	Low Activity	YY2:missense.snv:5	0.3137
KMT2A:missense.snv	0.245257	0.230656	complx_large	Low Activity	KMT2A:missense.snv:5	0.314989
MAX:missense.snv	0.253319	0.531777	complx_large	Low Activity	MAX:missense.snv:5	0.321347
CDC27:missense.snv	0.263451	0.259059	complx_large	Low Activity	CDC27:missense.snv:5	0.329672
CCDC26:part.amp	0.285971	0.586411	complx_large	Low Activity	CCDC26:part.amp:5	0.34374
FLG2:amp	0.298472	1.48219693752374e-322	complx_large	Low Activity	FLG2:amp:5	0.350229
PTPRD:truncating.snv	0.322408	1.25225e-90	complx_large	Low Activity	PTPRD:truncating.snv:5	0.362261
IRS2:missense.snv	0.33672	0.366691	complx_large	Low Activity	IRS2:missense.snv:5	0.369483
RERE:missense.snv	0.336756	0.47002	complx_large	Low Activity	RERE:missense.snv:5	0.369483
NOTCH1:missense.snv	0.336756	0.47002	complx_large	Low Activity	NOTCH1:missense.snv:5	0.369483
BCORL1:truncating.snv	0.338536	0.0664734	complx_large	Low Activity	BCORL1:truncating.snv:5	0.369483
MGA:truncating.snv	0.345457	0.39875	complx_large	Low Activity	MGA:truncating.snv:5	0.370748
SETD2:truncating.snv	0.361679	0.479454	complx_large	Low Activity	SETD2:truncating.snv:5	0.379514
KRAS:missense.snv	0.36943	0.704044	complx_large	Low Activity	KRAS:missense.snv:5	0.383005
ANK1:missense.snv	0.375239	0.405369	complx_large	Low Activity	ANK1:missense.snv:5	0.383158
ZNF331:missense.snv	0.375293	0.13649	complx_large	Low Activity	ZNF331:missense.snv:5	0.383158
BCL11A:missense.snv	0.375293	0.13649	complx_large	Low Activity	BCL11A:missense.snv:5	0.383158
ZNF292:missense.snv	0.381554	0.505316	complx_large	Low Activity	ZNF292:missense.snv:5	0.386646
PDE4DIP:missense.snv	0.390562	0.418643	complx_large	Low Activity	PDE4DIP:missense.snv:5	0.390124
BIRC6:missense.snv	0.395202	0.41903	complx_large	Low Activity	BIRC6:missense.snv:5	0.390761
CTNND1:coding.sv	0.39749	0.253672	complx_large	Low Activity	CTNND1:coding.sv:5	0.391724
PTPRB:missense.snv	0.399941	0.21174	complx_large	Low Activity	PTPRB:missense.snv:5	0.392565
RALGAPB:missense.snv	0.407462	0.575759	complx_large	Low Activity	RALGAPB:missense.snv:5	0.393982
KMT2C:missense.snv	0.407462	0.575759	complx_large	Low Activity	KMT2C:missense.snv:5	0.393982
CSF1R:missense.snv	0.414531	0.227749	complx_large	Low Activity	CSF1R:missense.snv:5	0.395584
IGF2R:missense.snv	0.423439	0.618159	complx_large	Low Activity	IGF2R:missense.snv:5	0.400039
CSNK1G3:coding.sv	0.427977	0.284765	complx_large	Low Activity	CSNK1G3:coding.sv:5	0.403219
LIFR:missense.snv	0.428707	0.251653	complx_large	Low Activity	LIFR:missense.snv:5	0.403539
CHD8:truncating.snv	0.450399	0.266223	complx_large	Low Activity	CHD8:truncating.snv:5	0.412521
CHD2:missense.snv	0.450399	0.266223	complx_large	Low Activity	CHD2:missense.snv:5	0.412521
MUC4:missense.snv	0.450399	0.266223	complx_large	Low Activity	MUC4:missense.snv:5	0.412521
PTPN11:missense.snv	0.467785	0.480842	complx_large	Low Activity	PTPN11:missense.snv:5	0.420761
PDGFRL:missense.snv	0.468972	0.300214	complx_large	Low Activity	PDGFRL:missense.snv:5	0.421095
ZNF133:missense.snv	0.472627	0.3127	complx_large	Low Activity	ZNF133:missense.snv:5	0.422906
PTPRT:missense.snv	0.472627	0.3127	complx_large	Low Activity	PTPRT:missense.snv:5	0.422906
8q24.21_Amp(CCDC26)	0.477865	0.79143	complx_large	Low Activity	8q24.21_Amp(CCDC26):5	0.424138
ANKRD11:missense.snv	0.479042	0.593917	complx_large	Low Activity	ANKRD11:missense.snv:5	0.424138
2p24.3_Amp(MYCN)	0.479155	0.816182	complx_large	Low Activity	2p24.3_Amp(MYCN):5	0.424138
MED12:missense.snv	0.483909	0.47002	complx_large	Low Activity	MED12:missense.snv:5	0.424643
AKT3:missense.snv	0.484731	0.357028	complx_large	Low Activity	AKT3:missense.snv:5	0.424643
ARHGAP26:missense.snv	0.486843	0.513087	complx_large	Low Activity	ARHGAP26:missense.snv:5	0.424948
AKAP9:missense.snv	0.489524	0.494163	complx_large	Low Activity	AKAP9:missense.snv:5	0.426372
ALMS1:missense.snv	0.493677	0.503346	complx_large	Low Activity	ALMS1:missense.snv:5	0.429099
PABPC1:missense.snv	0.504203	0.571393	complx_large	Low Activity	PABPC1:missense.snv:5	0.43157
KEAP1:missense.snv	0.515955	0.980252	complx_large	Low Activity	KEAP1:missense.snv:5	0.434563
RGS7:part.amp	0.53746	0.52425	complx_large	Low Activity	RGS7:part.amp:5	0.444695
NOTCH2:part.amp	0.550494	0.771301	complx_large	Low Activity	NOTCH2:part.amp:5	0.44759
ARID1B:missense.snv	0.566107	0.551602	complx_large	Low Activity	ARID1B:missense.snv:5	0.449973
APC:missense.snv	0.566107	0.551602	complx_large	Low Activity	APC:missense.snv:5	0.449973
CUX1:missense.snv	0.566107	0.551602	complx_large	Low Activity	CUX1:missense.snv:5	0.449973
MED23:missense.snv	0.566107	0.551602	complx_large	Low Activity	MED23:missense.snv:5	0.449973
SETD1B:missense.snv	0.566107	0.551602	complx_large	Low Activity	SETD1B:missense.snv:5	0.449973
SELE:missense.snv	0.573656	0.420996	complx_large	Low Activity	SELE:missense.snv:5	0.449973
MYH11:missense.snv	0.574186	0.690481	complx_large	Low Activity	MYH11:missense.snv:5	0.449973
REV3L:missense.snv	0.58078	0.548236	complx_large	Low Activity	REV3L:missense.snv:5	0.450167
PTPRK:missense.snv	0.594787	0.582891	complx_large	Low Activity	PTPRK:missense.snv:5	0.454558
DROSHA:missense.snv	0.604986	0.988623	complx_large	Low Activity	DROSHA:missense.snv:5	0.458333
ANKRD52:missense.snv	0.621266	0.665816	complx_large	Low Activity	ANKRD52:missense.snv:5	0.466898
ESR1:missense.snv	0.621864	0.13649	complx_large	Low Activity	ESR1:missense.snv:5	0.467008
STAT3:missense.snv	0.624501	0.462462	complx_large	Low Activity	STAT3:missense.snv:5	0.468306
NCOR1:missense.snv	0.630991	0.467103	complx_large	Low Activity	NCOR1:missense.snv:5	0.472297
DDB1:missense.snv	0.635169	0.607629	complx_large	Low Activity	DDB1:missense.snv:5	0.473969
ALKBH3:flank.sv	0.641366	0.95504	complx_large	Low Activity	ALKBH3:flank.sv:5	0.47514
EXT2:flank.sv	0.641366	0.95504	complx_large	Low Activity	EXT2:flank.sv:5	0.47514
DICER1:missense.snv	0.644057	0.499548	complx_large	Low Activity	DICER1:missense.snv:5	0.47514
LRRC37B:missense.snv	0.646256	0.533815	complx_large	Low Activity	LRRC37B:missense.snv:5	0.47514
TFDP2:truncating.snv	0.646967	0.896287	complx_large	Low Activity	TFDP2:truncating.snv:5	0.47514
WWOX:missense.snv	0.646967	0.896287	complx_large	Low Activity	WWOX:missense.snv:5	0.47514
KMT2D:truncating.snv	0.646967	0.836162	complx_large	Low Activity	KMT2D:truncating.snv:5	0.47514
ARID2:truncating.snv	0.646967	0.896287	complx_large	Low Activity	ARID2:truncating.snv:5	0.47514
SMARCA4:missense.snv	0.653584	0.607646	complx_large	Low Activity	SMARCA4:missense.snv:5	0.477967
PDGFRA:missense.snv	0.658107	0.784602	complx_large	Low Activity	PDGFRA:missense.snv:5	0.480594
DIS3L2:missense.snv	0.663862	0.505327	complx_large	Low Activity	DIS3L2:missense.snv:5	0.482228
KMT2A:truncating.snv	0.663862	0.505327	complx_large	Low Activity	KMT2A:truncating.snv:5	0.482228
WNK2:missense.snv	0.666183	0.675693	complx_large	Low Activity	WNK2:missense.snv:5	0.482397
MUC16:missense.snv	0.669265	0.792625	complx_large	Low Activity	MUC16:missense.snv:5	0.48296
CUL4A:missense.snv	0.670518	0.505794	complx_large	Low Activity	CUL4A:missense.snv:5	0.48296
ARID1A:missense.snv	0.678406	0.682543	complx_large	Low Activity	ARID1A:missense.snv:5	0.485461
NCOR2:missense.snv	0.678406	0.682543	complx_large	Low Activity	NCOR2:missense.snv:5	0.485461
FAT4:missense.snv	0.678406	0.682543	complx_large	Low Activity	FAT4:missense.snv:5	0.485461
TERT:missense.snv	0.679553	0.837137	complx_large	Low Activity	TERT:missense.snv:5	0.485506
EGFR:missense.snv	0.679879	0.909373	complx_large	Low Activity	EGFR:missense.snv:5	0.485506
ANKRD11:part.amp	0.689698	0.965458	complx_large	Low Activity	ANKRD11:part.amp:5	0.487461
CDKN2C:missense.snv	0.70392	0.205918	complx_large	Low Activity	CDKN2C:missense.snv:5	0.492939
NCOA1:missense.snv	0.714685	0.679754	complx_large	Low Activity	NCOA1:missense.snv:5	0.497293
PRDM2:missense.snv	0.715574	0.763717	complx_large	Low Activity	PRDM2:missense.snv:5	0.497576
17q25.3_Del	0.728274	0.591606	complx_large	Low Activity	17q25.3_Del:5	0.501342
ZNF676:missense.snv	0.728759	0.62608	complx_large	Low Activity	ZNF676:missense.snv:5	0.501342
PRKD1:missense.snv	0.737113	0.789564	complx_large	Low Activity	PRKD1:missense.snv:5	0.502255
TSPAN16:missense.snv	0.737868	0.596538	complx_large	Low Activity	TSPAN16:missense.snv:5	0.502255
AMER1:missense.snv	0.738421	0.970713	complx_large	Low Activity	AMER1:missense.snv:5	0.5023
IDH1:missense.snv	0.75616	0.890038	complx_large	Low Activity	IDH1:missense.snv:5	0.507845
5p15.33_Del	0.760148	0.852417	complx_large	Low Activity	5p15.33_Del:5	0.507845
MET:part.amp	0.768767	0.253672	complx_large	Low Activity	MET:part.amp:5	0.510346
RGPD3:missense.snv	0.783023	0.59178	complx_large	Low Activity	RGPD3:missense.snv:5	0.515984
ARID1B:truncating.snv	0.791611	0.640737	complx_large	Low Activity	ARID1B:truncating.snv:5	0.519193
TOP1:missense.snv	0.810575	0.393161	complx_large	Low Activity	TOP1:missense.snv:5	0.528074
DCC:coding.sv	0.812948	0.909895	complx_large	Low Activity	DCC:coding.sv:5	0.528953
WWOX:coding.sv	0.818877	0.767702	complx_large	Low Activity	WWOX:coding.sv:5	0.531105
LRP1B:intron.sv	0.823443	0.391273	complx_large	Low Activity	LRP1B:intron.sv:5	0.531761
DNMT3A:missense.snv	0.845822	0.790381	complx_large	Low Activity	DNMT3A:missense.snv:5	0.541134
PDGFRA:coding.sv	0.846342	0.774011	complx_large	Low Activity	PDGFRA:coding.sv:5	0.541134
GPHN:coding.sv	0.851223	0.651498	complx_large	Low Activity	GPHN:coding.sv:5	0.54291
NF1:missense.snv	0.851916	0.793886	complx_large	Low Activity	NF1:missense.snv:5	0.543016
CSMD3:coding.sv	0.85379	0.700979	complx_large	Low Activity	CSMD3:coding.sv:5	0.543273
ERC1:missense.snv	0.85379	0.610811	complx_large	Low Activity	ERC1:missense.snv:5	0.543273
FGFR1:missense.snv	0.858019	0.794227	complx_large	Low Activity	FGFR1:missense.snv:5	0.544554
EYA1:missense.snv	0.878406	0.66833	complx_large	Low Activity	EYA1:missense.snv:5	0.552319
RALGDS:missense.snv	0.9017	0.665816	complx_large	Low Activity	RALGDS:missense.snv:5	0.560225
SPEN:missense.snv	0.9017	0.665816	complx_large	Low Activity	SPEN:missense.snv:5	0.560225
RANBP2:missense.snv	0.9017	0.665816	complx_large	Low Activity	RANBP2:missense.snv:5	0.560225
MUC20:missense.snv	0.9017	0.665816	complx_large	Low Activity	MUC20:missense.snv:5	0.560225
POLD1:missense.snv	0.9017	0.665816	complx_large	Low Activity	POLD1:missense.snv:5	0.560225
SETBP1:missense.snv	0.933243	0.698856	complx_large	Low Activity	SETBP1:missense.snv:5	0.571568
TRRAP:missense.snv	0.938002	0.913725	complx_large	Low Activity	TRRAP:missense.snv:5	0.572726
LRP1B:missense.snv	0.938002	0.913725	complx_large	Low Activity	LRP1B:missense.snv:5	0.572726
TGM4:missense.snv	0.939025	0.623298	complx_large	Low Activity	TGM4:missense.snv:5	0.572726
FAM47C:missense.snv	0.943083	0.886496	complx_large	Low Activity	FAM47C:missense.snv:5	0.573172
PLCG1:missense.snv	0.947142	0.635353	complx_large	Low Activity	PLCG1:missense.snv:5	0.573395
MCM7:missense.snv	0.947142	0.635353	complx_large	Low Activity	MCM7:missense.snv:5	0.573395
MAD1L1:coding.sv	0.957856	0.98381	complx_large	Low Activity	MAD1L1:coding.sv:5	0.576202
CHIC2:flank.sv	0.958107	0.967674	complx_large	Low Activity	CHIC2:flank.sv:5	0.576202
TET2:missense.snv	0.967159	0.82387	complx_large	Low Activity	TET2:missense.snv:5	0.578103
NCKAP1:missense.snv	0.967159	0.82387	complx_large	Low Activity	NCKAP1:missense.snv:5	0.578103
NOTCH2:missense.snv	0.967159	0.82387	complx_large	Low Activity	NOTCH2:missense.snv:5	0.578103
SETD1A:missense.snv	0.967985	0.885745	complx_large	Low Activity	SETD1A:missense.snv:5	0.578103
ARHGEF10:missense.snv	0.981752	0.815601	complx_large	Low Activity	ARHGEF10:missense.snv:5	0.581615
ATR:missense.snv	0.981752	0.715815	complx_large	Low Activity	ATR:missense.snv:5	0.581615
PPFIA1:missense.snv	0.983292	0.918523	complx_large	Low Activity	PPFIA1:missense.snv:5	0.581764
CNBD1:flank.sv	0.984284	0.906851	complx_large	Low Activity	CNBD1:flank.sv:5	0.58178
SH2B3:missense.snv	0.993317	0.752909	complx_large	Low Activity	SH2B3:missense.snv:5	0.583382
PTEN:missense.snv	1	0.905536	complx_large	Low Activity	PTEN:missense.snv:5	0.585041
ATP8B3:missense.snv	0.000938608	2.05376	mixed_simpl	High Activity	ATP8B3:missense.snv:3	0.042708
MYO5A:missense.snv	0.00188456	2.44761	mixed_simpl	High Activity	MYO5A:missense.snv:3	0.0498973
ANK1:missense.snv	0.00258627	1.93216	mixed_simpl	High Activity	ANK1:missense.snv:3	0.0604085
UBR5:missense.snv	0.00266125	2.0228	mixed_simpl	High Activity	UBR5:missense.snv:3	0.0604085
PTPRB:missense.snv	0.00269107	2.15386	mixed_simpl	High Activity	PTPRB:missense.snv:3	0.0604085
MTOR:missense.snv	0.00312203	2.00814	mixed_simpl	High Activity	MTOR:missense.snv:3	0.0642785
AKAP9:missense.snv	0.00320555	1.99993	mixed_simpl	High Activity	AKAP9:missense.snv:3	0.0642785
PIK3CA:missense.snv	0.00340931	1.48573	mixed_simpl	High Activity	PIK3CA:missense.snv:3	0.0642785
ALMS1:missense.snv	0.00373755	1.88676	mixed_simpl	High Activity	ALMS1:missense.snv:3	0.0642785
PDE4DIP:missense.snv	0.00405399	1.95444	mixed_simpl	High Activity	PDE4DIP:missense.snv:3	0.0647116
MAP3K1:missense.snv	0.00437741	2.06886	mixed_simpl	High Activity	MAP3K1:missense.snv:3	0.0647116
DNMBP:missense.snv	0.00489321	2.29762	mixed_simpl	High Activity	DNMBP:missense.snv:3	0.0673696
MTNR1A:missense.snv	0.00489321	2.29762	mixed_simpl	High Activity	MTNR1A:missense.snv:3	0.0673696
PTPN11:missense.snv	0.00566679	1.84301	mixed_simpl	High Activity	PTPN11:missense.snv:3	0.0759937
RB1:missense.snv	0.0063879	1.91947	mixed_simpl	High Activity	RB1:missense.snv:3	0.0774313
BCLAF1:missense.snv	0.00678695	2.00464	mixed_simpl	High Activity	BCLAF1:missense.snv:3	0.0774313
ZNF292:missense.snv	0.00703677	1.84511	mixed_simpl	High Activity	ZNF292:missense.snv:3	0.0789799
DIS3L2:missense.snv	0.00715997	1.99696	mixed_simpl	High Activity	DIS3L2:missense.snv:3	0.0794986
ACVR1:truncating.snv	0.00724683	2.09825	mixed_simpl	High Activity	ACVR1:truncating.snv:3	0.079607
PPM1D:truncating.snv	0.00745562	1.66333	mixed_simpl	High Activity	PPM1D:truncating.snv:3	0.079664
TUBG1:missense.snv	0.007689	2.44306	mixed_simpl	High Activity	TUBG1:missense.snv:3	0.0801985
KMT2A:truncating.snv	0.00796167	1.98204	mixed_simpl	High Activity	KMT2A:truncating.snv:3	0.0813981
LIFR:missense.snv	0.00817426	1.97265	mixed_simpl	High Activity	LIFR:missense.snv:3	0.0818826
LRRC37B:missense.snv	0.00864656	2.11328	mixed_simpl	High Activity	LRRC37B:missense.snv:3	0.0834432
CHD2:missense.snv	0.00890203	2.11631	mixed_simpl	High Activity	CHD2:missense.snv:3	0.0834848
MUC4:missense.snv	0.00890203	2.11631	mixed_simpl	High Activity	MUC4:missense.snv:3	0.0834848
NCOA1:missense.snv	0.00941288	1.96193	mixed_simpl	High Activity	NCOA1:missense.snv:3	0.0860153
KMT2C:missense.snv	0.0100539	1.85244	mixed_simpl	High Activity	KMT2C:missense.snv:3	0.0902748
CHD8:truncating.snv	0.0102832	2.09375	mixed_simpl	High Activity	CHD8:truncating.snv:3	0.0906666
ZNF292:truncating.snv	0.0105964	1.94234	mixed_simpl	High Activity	ZNF292:truncating.snv:3	0.0906666
TYRO3:missense.snv	0.0108401	1.87311	mixed_simpl	High Activity	TYRO3:missense.snv:3	0.0906666
BIRC6:missense.snv	0.0110961	1.8706	mixed_simpl	High Activity	BIRC6:missense.snv:3	0.0906666
DICER1:missense.snv	0.0111512	1.93124	mixed_simpl	High Activity	DICER1:missense.snv:3	0.0906666
ARHGAP26:missense.snv	0.0126526	1.88774	mixed_simpl	High Activity	ARHGAP26:missense.snv:3	0.0989776
STAT3:missense.snv	0.0133016	1.90103	mixed_simpl	High Activity	STAT3:missense.snv:3	0.0992363
FLG2:missense.snv	0.0158943	1.68669	mixed_simpl	High Activity	FLG2:missense.snv:3	0.110895
TCF7L2:missense.snv	0.0160699	2.06091	mixed_simpl	High Activity	TCF7L2:missense.snv:3	0.111367
CTCF:missense.snv	0.017424	1.88647	mixed_simpl	High Activity	CTCF:missense.snv:3	0.116161
MYH11:missense.snv	0.0181955	1.70958	mixed_simpl	High Activity	MYH11:missense.snv:3	0.117901
2p25.1_Amp(KIDINS220)	0.0187593	1.47821	mixed_simpl	High Activity	2p25.1_Amp(KIDINS220):3	0.118839
DLC1:missense.snv	0.0196423	1.84867	mixed_simpl	High Activity	DLC1:missense.snv:3	0.122185
DNMT3A:missense.snv	0.0201177	1.74577	mixed_simpl	High Activity	DNMT3A:missense.snv:3	0.122876
ACVR1:missense.snv	0.0206853	1.39207	mixed_simpl	High Activity	ACVR1:missense.snv:3	0.122876
NF1:missense.snv	0.0209434	1.74265	mixed_simpl	High Activity	NF1:missense.snv:3	0.122876
RALGAPB:missense.snv	0.0209434	1.73719	mixed_simpl	High Activity	RALGAPB:missense.snv:3	0.122876
PLCG1:missense.snv	0.0227104	1.93228	mixed_simpl	High Activity	PLCG1:missense.snv:3	0.124254
MCM7:missense.snv	0.0227104	1.93228	mixed_simpl	High Activity	MCM7:missense.snv:3	0.124254
STAG2:missense.snv	0.0231707	1.89181	mixed_simpl	High Activity	STAG2:missense.snv:3	0.124254
ATM:truncating.snv	0.0233082	1.99601	mixed_simpl	High Activity	ATM:truncating.snv:3	0.124254
MED23:missense.snv	0.0236693	1.80335	mixed_simpl	High Activity	MED23:missense.snv:3	0.124254
CUX1:missense.snv	0.0236693	1.80335	mixed_simpl	High Activity	CUX1:missense.snv:3	0.124254
SETD1B:missense.snv	0.0236693	1.80335	mixed_simpl	High Activity	SETD1B:missense.snv:3	0.124254
APC:missense.snv	0.0236693	1.80335	mixed_simpl	High Activity	APC:missense.snv:3	0.124254
ARID1B:missense.snv	0.0236693	1.80335	mixed_simpl	High Activity	ARID1B:missense.snv:3	0.124254
CTNNA2:missense.snv	0.0237054	1.82895	mixed_simpl	High Activity	CTNNA2:missense.snv:3	0.124254
ERC1:missense.snv	0.0257578	1.78767	mixed_simpl	High Activity	ERC1:missense.snv:3	0.130547
2p24.3_Amp(MYCN)	0.027108	1.41019	mixed_simpl	High Activity	2p24.3_Amp(MYCN):3	0.132662
ANKRD11:missense.snv	0.027429	1.6113	mixed_simpl	High Activity	ANKRD11:missense.snv:3	0.133496
NCOR1:missense.snv	0.0278398	1.81447	mixed_simpl	High Activity	NCOR1:missense.snv:3	0.133546
WNK2:missense.snv	0.0285911	1.78199	mixed_simpl	High Activity	WNK2:missense.snv:3	0.134842
PDGFRA:missense.snv	0.0291735	1.42429	mixed_simpl	High Activity	PDGFRA:missense.snv:3	0.135696
SETD1A:missense.snv	0.0311118	1.70964	mixed_simpl	High Activity	SETD1A:missense.snv:3	0.140903
PDGFRL:missense.snv	0.031617	1.80633	mixed_simpl	High Activity	PDGFRL:missense.snv:3	0.141489
BCL11A:missense.snv	0.0316521	1.97609	mixed_simpl	High Activity	BCL11A:missense.snv:3	0.141489
AKT3:missense.snv	0.0325698	2.06015	mixed_simpl	High Activity	AKT3:missense.snv:3	0.143129
CUL4A:missense.snv	0.0333126	1.79119	mixed_simpl	High Activity	CUL4A:missense.snv:3	0.143129
PABPC1:missense.snv	0.0333126	1.79313	mixed_simpl	High Activity	PABPC1:missense.snv:3	0.143129
2p25.1_Amp	0.0336813	1.42504	mixed_simpl	High Activity	2p25.1_Amp:3	0.143129
NCOR2:missense.snv	0.0336823	1.77035	mixed_simpl	High Activity	NCOR2:missense.snv:3	0.143129
ARID1A:missense.snv	0.0336823	1.77035	mixed_simpl	High Activity	ARID1A:missense.snv:3	0.143129
FAT4:missense.snv	0.0336823	1.77035	mixed_simpl	High Activity	FAT4:missense.snv:3	0.143129
ATR:missense.snv	0.03559	1.7936	mixed_simpl	High Activity	ATR:missense.snv:3	0.147591
CDC27:missense.snv	0.035782	1.76635	mixed_simpl	High Activity	CDC27:missense.snv:3	0.147794
ZNF331:missense.snv	0.0364718	1.94669	mixed_simpl	High Activity	ZNF331:missense.snv:3	0.148856
4q35.1_Del	0.0379392	1.41678	mixed_simpl	High Activity	4q35.1_Del:3	0.15183
ANKRD52:missense.snv	0.0396809	1.83236	mixed_simpl	High Activity	ANKRD52:missense.snv:3	0.15462
ESR1:missense.snv	0.0407652	1.9151	mixed_simpl	High Activity	ESR1:missense.snv:3	0.157656
PRDM2:missense.snv	0.0440317	1.76635	mixed_simpl	High Activity	PRDM2:missense.snv:3	0.161818
RERE:missense.snv	0.0440354	1.73862	mixed_simpl	High Activity	RERE:missense.snv:3	0.161818
MED12:missense.snv	0.0440354	1.63589	mixed_simpl	High Activity	MED12:missense.snv:3	0.161818
SETD2:missense.snv	0.0481659	1.60343	mixed_simpl	High Activity	SETD2:missense.snv:3	0.16917
MYC:flank.sv	0.0486235	1.29954	mixed_simpl	High Activity	MYC:flank.sv:3	0.169494
SMARCA4:missense.snv	0.0487271	1.52711	mixed_simpl	High Activity	SMARCA4:missense.snv:3	0.169494
PTPRK:missense.snv	0.0508621	1.66266	mixed_simpl	High Activity	PTPRK:missense.snv:3	0.171075
TCF12:missense.snv	0.0510954	1.8631	mixed_simpl	High Activity	TCF12:missense.snv:3	0.171302
FAM47C:missense.snv	0.058609	1.82838	mixed_simpl	High Activity	FAM47C:missense.snv:3	0.186214
GPC3:missense.snv	0.0599464	1.71117	mixed_simpl	High Activity	GPC3:missense.snv:3	0.189298
PRKD1:missense.snv	0.0602939	1.57306	mixed_simpl	High Activity	PRKD1:missense.snv:3	0.189619
RALGDS:missense.snv	0.0627236	1.72677	mixed_simpl	High Activity	RALGDS:missense.snv:3	0.191057
MUC20:missense.snv	0.0627236	1.72677	mixed_simpl	High Activity	MUC20:missense.snv:3	0.191057
SPEN:missense.snv	0.0627236	1.72677	mixed_simpl	High Activity	SPEN:missense.snv:3	0.191057
RANBP2:missense.snv	0.0627236	1.72677	mixed_simpl	High Activity	RANBP2:missense.snv:3	0.191057
CCDC26:coding.sv	0.067152	1.3407	mixed_simpl	High Activity	CCDC26:coding.sv:3	0.198685
POLD1:missense.snv	0.0679217	1.71207	mixed_simpl	High Activity	POLD1:missense.snv:3	0.199321
TDG:coding.sv	0.0685253	2.10815	mixed_simpl	High Activity	TDG:coding.sv:3	0.199321
RLIM:missense.snv	0.070936	2.14336	mixed_simpl	High Activity	RLIM:missense.snv:3	0.199917
DDB1:missense.snv	0.0739959	1.58821	mixed_simpl	High Activity	DDB1:missense.snv:3	0.199917
CCR7:missense.snv	0.0763963	1.95907	mixed_simpl	High Activity	CCR7:missense.snv:3	0.203047
SELE:missense.snv	0.0778683	1.64964	mixed_simpl	High Activity	SELE:missense.snv:3	0.203047
ARHGEF10:missense.snv	0.0809186	1.68695	mixed_simpl	High Activity	ARHGEF10:missense.snv:3	0.207126
AKT3:part.amp	0.0823327	1.70631	mixed_simpl	High Activity	AKT3:part.amp:3	0.208886
CLTCL1:missense.snv	0.0861245	1.5757	mixed_simpl	High Activity	CLTCL1:missense.snv:3	0.212877
NCKAP1:missense.snv	0.0873102	1.68791	mixed_simpl	High Activity	NCKAP1:missense.snv:3	0.212877
TET2:missense.snv	0.0873102	1.68791	mixed_simpl	High Activity	TET2:missense.snv:3	0.212877
NOTCH2:missense.snv	0.0873102	1.68791	mixed_simpl	High Activity	NOTCH2:missense.snv:3	0.212877
REV3L:missense.snv	0.0885001	1.56762	mixed_simpl	High Activity	REV3L:missense.snv:3	0.212877
SETD2:truncating.snv	0.0916287	1.44672	mixed_simpl	High Activity	SETD2:truncating.snv:3	0.214814
PTPRT:missense.snv	0.0923663	1.6832	mixed_simpl	High Activity	PTPRT:missense.snv:3	0.214814
ZNF133:missense.snv	0.0923663	1.6832	mixed_simpl	High Activity	ZNF133:missense.snv:3	0.214814
ARID1B:truncating.snv	0.0929261	1.68089	mixed_simpl	High Activity	ARID1B:truncating.snv:3	0.215146
IGF2R:missense.snv	0.0991722	1.65763	mixed_simpl	High Activity	IGF2R:missense.snv:3	0.220995
ANKRD11:truncating.snv	0.104572	1.64891	mixed_simpl	High Activity	ANKRD11:truncating.snv:3	0.22685
IRS2:missense.snv	0.10508	1.67546	mixed_simpl	High Activity	IRS2:missense.snv:3	0.227474
FLG2:amp	0.106926	1.87302	mixed_simpl	High Activity	FLG2:amp:3	0.228595
TRRAP:missense.snv	0.118872	1.54005	mixed_simpl	High Activity	TRRAP:missense.snv:3	0.231938
BCOR:truncating.snv	0.120784	1.34614	mixed_simpl	High Activity	BCOR:truncating.snv:3	0.231938
COL1A1:missense.snv	0.122348	1.52135	mixed_simpl	High Activity	COL1A1:missense.snv:3	0.231938
TGM4:missense.snv	0.125094	1.62181	mixed_simpl	High Activity	TGM4:missense.snv:3	0.232109
NOTCH1:missense.snv	0.13	1.53664	mixed_simpl	High Activity	NOTCH1:missense.snv:3	0.23321
FRYL:missense.snv	0.135859	1.52185	mixed_simpl	High Activity	FRYL:missense.snv:3	0.236863
FN1:missense.snv	0.135859	1.52185	mixed_simpl	High Activity	FN1:missense.snv:3	0.236863
SETBP1:missense.snv	0.138935	1.51625	mixed_simpl	High Activity	SETBP1:missense.snv:3	0.239289
KMT2A:missense.snv	0.14913	1.56144	mixed_simpl	High Activity	KMT2A:missense.snv:3	0.249794
CDKN2C:missense.snv	0.164883	1.72865	mixed_simpl	High Activity	CDKN2C:missense.snv:3	0.263557
TERT:missense.snv	0.175401	1.60112	mixed_simpl	High Activity	TERT:missense.snv:3	0.27277
RNF213:missense.snv	0.183972	1.50851	mixed_simpl	High Activity	RNF213:missense.snv:3	0.279367
PTEN:missense.snv	0.185082	1.42968	mixed_simpl	High Activity	PTEN:missense.snv:3	0.280227
EYA1:missense.snv	0.198596	1.50877	mixed_simpl	High Activity	EYA1:missense.snv:3	0.295426
KMT2D:truncating.snv	0.204551	1.47916	mixed_simpl	High Activity	KMT2D:truncating.snv:3	0.296655
BCORL1:truncating.snv	0.204551	1.4259	mixed_simpl	High Activity	BCORL1:truncating.snv:3	0.296655
NTRK3:missense.snv	0.205618	1.57029	mixed_simpl	High Activity	NTRK3:missense.snv:3	0.297368
LRP1B:coding.sv	0.207413	1.18738	mixed_simpl	High Activity	LRP1B:coding.sv:3	0.297435
RGPD3:missense.snv	0.212819	1.49764	mixed_simpl	High Activity	RGPD3:missense.snv:3	0.299804
PPFIA1:missense.snv	0.216764	1.45213	mixed_simpl	High Activity	PPFIA1:missense.snv:3	0.302473
8q24.21_Amp(CCDC26)	0.220719	1.13001	mixed_simpl	High Activity	8q24.21_Amp(CCDC26):3	0.305784
KMT2C:truncating.snv	0.223958	1.55854	mixed_simpl	High Activity	KMT2C:truncating.snv:3	0.307524
POT1:missense.snv	0.235508	1.55348	mixed_simpl	High Activity	POT1:missense.snv:3	0.312541
INPPL1:missense.snv	0.235508	1.55348	mixed_simpl	High Activity	INPPL1:missense.snv:3	0.312541
TET1:missense.snv	0.235508	1.55348	mixed_simpl	High Activity	TET1:missense.snv:3	0.312541
FGFR1:missense.snv	0.243672	1.36944	mixed_simpl	High Activity	FGFR1:missense.snv:3	0.3137
TOP1:missense.snv	0.247473	1.54771	mixed_simpl	High Activity	TOP1:missense.snv:3	0.316263
CSF1R:missense.snv	0.259858	1.4735	mixed_simpl	High Activity	CSF1R:missense.snv:3	0.32803
MUC16:missense.snv	0.290158	1.22102	mixed_simpl	High Activity	MUC16:missense.snv:3	0.346426
CCDC26:part.amp	0.290194	1.24482	mixed_simpl	High Activity	CCDC26:part.amp:3	0.346426
ETV1:part.amp	0.290403	1.32429	mixed_simpl	High Activity	ETV1:part.amp:3	0.346426
SH2B3:missense.snv	0.291054	1.43056	mixed_simpl	High Activity	SH2B3:missense.snv:3	0.346426
FAF1:coding.sv	0.294795	1.19348	mixed_simpl	High Activity	FAF1:coding.sv:3	0.34829
PIK3R1:missense.snv	0.300516	1.30154	mixed_simpl	High Activity	PIK3R1:missense.snv:3	0.350898
YY2:missense.snv	0.311268	1.53618	mixed_simpl	High Activity	YY2:missense.snv:3	0.358721
17q25.3_Del	0.339623	1.28863	mixed_simpl	High Activity	17q25.3_Del:3	0.369483
ZNF676:missense.snv	0.358484	1.35435	mixed_simpl	High Activity	ZNF676:missense.snv:3	0.377979
CTNND2:missense.snv	0.368437	1.34973	mixed_simpl	High Activity	CTNND2:missense.snv:3	0.382359
PML:missense.snv	0.368437	1.41289	mixed_simpl	High Activity	PML:missense.snv:3	0.382359
LRP1B:intron.sv	0.372654	1.24076	mixed_simpl	High Activity	LRP1B:intron.sv:3	0.383158
KEAP1:missense.snv	0.382832	1.33897	mixed_simpl	High Activity	KEAP1:missense.snv:3	0.38756
ELMO2:truncating.snv	0.391321	1.32924	mixed_simpl	High Activity	ELMO2:truncating.snv:3	0.390124
PBRM1:truncating.snv	0.392617	1.40721	mixed_simpl	High Activity	PBRM1:truncating.snv:3	0.390761
AMER1:missense.snv	0.397567	1.34019	mixed_simpl	High Activity	AMER1:missense.snv:3	0.391724
CNTNAP2:part.amp	0.407577	1.63662	mixed_simpl	High Activity	CNTNAP2:part.amp:3	0.393982
ATRX:coding.sv	0.409267	1.0913	mixed_simpl	High Activity	ATRX:coding.sv:3	0.393982
HIST1H3B:p.K28M	0.410056	1.14649	mixed_simpl	High Activity	HIST1H3B:p.K28M:3	0.393982
TSPAN16:missense.snv	0.410545	1.32192	mixed_simpl	High Activity	TSPAN16:missense.snv:3	0.393982
LIG1:missense.snv	0.417736	1.39543	mixed_simpl	High Activity	LIG1:missense.snv:3	0.396092
H3F3A:missense.snv	0.419072	1.15636	mixed_simpl	High Activity	H3F3A:missense.snv:3	0.396639
DROSHA:missense.snv	0.422279	1.28356	mixed_simpl	High Activity	DROSHA:missense.snv:3	0.399308
KRAS:missense.snv	0.435816	1.31663	mixed_simpl	High Activity	KRAS:missense.snv:3	0.407147
20q11.21_Del	0.44235	1.09316	mixed_simpl	High Activity	20q11.21_Del:3	0.408925
KMT2C:coding.sv	0.450634	1.24676	mixed_simpl	High Activity	KMT2C:coding.sv:3	0.412521
ARID2:truncating.snv	0.485672	1.30461	mixed_simpl	High Activity	ARID2:truncating.snv:3	0.424643
WWOX:missense.snv	0.485672	1.30461	mixed_simpl	High Activity	WWOX:missense.snv:3	0.424643
KMT2C:part.amp	0.485672	1.21356	mixed_simpl	High Activity	KMT2C:part.amp:3	0.424643
TFDP2:truncating.snv	0.485672	1.30461	mixed_simpl	High Activity	TFDP2:truncating.snv:3	0.424643
PTPRD:truncating.snv	0.498425	1.21295	mixed_simpl	High Activity	PTPRD:truncating.snv:3	0.430453
LRP1B:missense.snv	0.510131	1.26124	mixed_simpl	High Activity	LRP1B:missense.snv:3	0.43268
KDM5A:coding.sv	0.521978	1.13457	mixed_simpl	High Activity	KDM5A:coding.sv:3	0.437495
CNBD1:flank.sv	0.529018	1.05103	mixed_simpl	High Activity	CNBD1:flank.sv:3	0.44089
ASXL1:truncating.snv	0.529977	1.10567	mixed_simpl	High Activity	ASXL1:truncating.snv:3	0.441333
CSMD3:coding.sv	0.538191	1.13763	mixed_simpl	High Activity	CSMD3:coding.sv:3	0.444715
PTEN:truncating.snv	0.541071	1.2603	mixed_simpl	High Activity	PTEN:truncating.snv:3	0.444715
ADA:missense.snv	0.541519	1.24181	mixed_simpl	High Activity	ADA:missense.snv:3	0.444715
BIRC6:truncating.snv	0.552283	1.26443	mixed_simpl	High Activity	BIRC6:truncating.snv:3	0.447986
TDP2:missense.snv	0.552283	1.26443	mixed_simpl	High Activity	TDP2:missense.snv:3	0.447986
MGA:truncating.snv	0.574878	1.1809	mixed_simpl	High Activity	MGA:truncating.snv:3	0.450051
RGS7:part.amp	0.581396	1.15921	mixed_simpl	High Activity	RGS7:part.amp:3	0.450167
MAP3K13:part.amp	0.607018	1.23975	mixed_simpl	High Activity	MAP3K13:part.amp:3	0.459198
HIST1H3B:p.R27R	0.631195	1.09025	mixed_simpl	High Activity	HIST1H3B:p.R27R:3	0.472297
ALK:coding.sv	0.664051	1.09403	mixed_simpl	High Activity	ALK:coding.sv:3	0.482228
IDH1:missense.snv	0.669749	1.34879	mixed_simpl	High Activity	IDH1:missense.snv:3	0.48296
CRTC3:missense.snv	0.689128	1.13159	mixed_simpl	High Activity	CRTC3:missense.snv:3	0.487392
ATRX:missense.snv	0.72837	1.1291	mixed_simpl	High Activity	ATRX:missense.snv:3	0.501342
ANKRD11:part.amp	0.731681	1.3556	mixed_simpl	High Activity	ANKRD11:part.amp:3	0.501755
HIST1H3C:missense.snv	0.748945	1.14837	mixed_simpl	High Activity	HIST1H3C:missense.snv:3	0.506216
NF1:truncating.snv	0.749079	1.10535	mixed_simpl	High Activity	NF1:truncating.snv:3	0.506216
KIT:amp	0.76206	1.02951	mixed_simpl	High Activity	KIT:amp:3	0.507845
PDGFRA:amp	0.76206	1.02951	mixed_simpl	High Activity	PDGFRA:amp:3	0.507845
EGFR:missense.snv	0.76865	1.06714	mixed_simpl	High Activity	EGFR:missense.snv:3	0.510346
12p12.1_Amp	0.777853	1.04311	mixed_simpl	High Activity	12p12.1_Amp:3	0.513722
MAX:missense.snv	0.815538	1.14883	mixed_simpl	High Activity	MAX:missense.snv:3	0.530304
13q14.2_Del(RB1)	0.816378	1.00513	mixed_simpl	High Activity	13q14.2_Del(RB1):3	0.530516
7q31.2_Amp(MET)	0.82058	1.05928	mixed_simpl	High Activity	7q31.2_Amp(MET):3	0.531241
ATRX:truncating.snv	0.83416	1.04602	mixed_simpl	High Activity	ATRX:truncating.snv:3	0.537003
BRAF:missense.snv	0.870235	1.23968	mixed_simpl	High Activity	BRAF:missense.snv:3	0.549604
DDB2:flank.sv	0.873684	1.00655	mixed_simpl	High Activity	DDB2:flank.sv:3	0.550913
7p11.2_Amp(EGFR)	0.877635	1.00621	mixed_simpl	High Activity	7p11.2_Amp(EGFR):3	0.552319
MET:part.amp	0.883479	1.76463	mixed_simpl	High Activity	MET:part.amp:3	0.55424
CCT7:missense.snv	0.899949	1.02739	mixed_simpl	High Activity	CCT7:missense.snv:3	0.560225
RB1:coding.sv	0.900785	1.00076	mixed_simpl	High Activity	RB1:coding.sv:3	0.560225
7p15.1_Amp	0.94733	1.00056	mixed_simpl	High Activity	7p15.1_Amp:3	0.573395
SETD1B:truncating.snv	0.964234	1.05163	mixed_simpl	High Activity	SETD1B:truncating.snv:3	0.577555
LARP4B:flank.sv	0.00338228	0.373247	mixed_simpl	Low Activity	LARP4B:flank.sv:3	0.0642785
POLR2I:flank.sv	0.00444948	0.317575	mixed_simpl	Low Activity	POLR2I:flank.sv:3	0.0647116
MET:flank.sv	0.00537005	0.350221	mixed_simpl	Low Activity	MET:flank.sv:3	0.0729619
MLLT3:flank.sv	0.00671527	0.387576	mixed_simpl	Low Activity	MLLT3:flank.sv:3	0.0774313
KDR:flank.sv	0.0133112	0.394702	mixed_simpl	Low Activity	KDR:flank.sv:3	0.0992363
PTPRD:flank.sv	0.0143811	0.438691	mixed_simpl	Low Activity	PTPRD:flank.sv:3	0.103845
MLLT3:coding.sv	0.0152517	0.308142	mixed_simpl	Low Activity	MLLT3:coding.sv:3	0.108613
MAD1L1:coding.sv	0.0174366	0.0340218	mixed_simpl	Low Activity	MAD1L1:coding.sv:3	0.116161
ERC1:coding.sv	0.0201145	0.23596	mixed_simpl	Low Activity	ERC1:coding.sv:3	0.122876
CLOCK:flank.sv	0.021234	0.442033	mixed_simpl	Low Activity	CLOCK:flank.sv:3	0.123053
LSM14A:flank.sv	0.0215568	0.446486	mixed_simpl	Low Activity	LSM14A:flank.sv:3	0.123053
MET:coding.sv	0.0255094	0.20097	mixed_simpl	Low Activity	MET:coding.sv:3	0.130401
10q23.31_Del(PTEN)	0.0261461	0.670457	mixed_simpl	Low Activity	10q23.31_Del(PTEN):3	0.131288
MAP2K4:coding.sv	0.0265989	0.0908252	mixed_simpl	Low Activity	MAP2K4:coding.sv:3	0.132556
CDK6:coding.sv	0.0269916	0.144793	mixed_simpl	Low Activity	CDK6:coding.sv:3	0.132662
MET:ExChr_amp	0.0275371	0.236144	mixed_simpl	Low Activity	MET:ExChr_amp:3	0.133496
SPECC1:part.amp	0.031617	0.196141	mixed_simpl	Low Activity	SPECC1:part.amp:3	0.141489
CTNND1:flank.sv	0.0392135	0.496202	mixed_simpl	Low Activity	CTNND1:flank.sv:3	0.153781
ELANE:flank.sv	0.0425237	0.453667	mixed_simpl	Low Activity	ELANE:flank.sv:3	0.160567
FSTL3:flank.sv	0.0425237	0.453667	mixed_simpl	Low Activity	FSTL3:flank.sv:3	0.160567
SDHA:flank.sv	0.0459523	0.428323	mixed_simpl	Low Activity	SDHA:flank.sv:3	0.165332
PTPRD:coding.sv	0.0468587	0.478609	mixed_simpl	Low Activity	PTPRD:coding.sv:3	0.16684
9p21.3_Del(CDKN2A)	0.0469656	0.623289	mixed_simpl	Low Activity	9p21.3_Del(CDKN2A):3	0.16684
EXT2:coding.sv	0.0498652	0.0464363	mixed_simpl	Low Activity	EXT2:coding.sv:3	0.169912
ID2:ExChr_amp	0.0499252	0.247384	mixed_simpl	Low Activity	ID2:ExChr_amp:3	0.169912
MSI2:coding.sv	0.0548347	0.174318	mixed_simpl	Low Activity	MSI2:coding.sv:3	0.179234
GPC5:coding.sv	0.0685119	0.28926	mixed_simpl	Low Activity	GPC5:coding.sv:3	0.199321
KDM5A:flank.sv	0.0701155	0.528162	mixed_simpl	Low Activity	KDM5A:flank.sv:3	0.199917
EGFR:coding.sv	0.073158	0.270084	mixed_simpl	Low Activity	EGFR:coding.sv:3	0.199917
EGFR:ExChr_amp	0.073158	0.270084	mixed_simpl	Low Activity	EGFR:ExChr_amp:3	0.199917
6q25.2_Del	0.0767407	0.558692	mixed_simpl	Low Activity	6q25.2_Del:3	0.203047
PDGFRA:part.amp	0.0843691	0.230503	mixed_simpl	Low Activity	PDGFRA:part.amp:3	0.210943
CLOCK:coding.sv	0.0850054	0.328436	mixed_simpl	Low Activity	CLOCK:coding.sv:3	0.211509
TERT:flank.sv	0.0892103	0.468342	mixed_simpl	Low Activity	TERT:flank.sv:3	0.212877
MAPK1:flank.sv	0.09531	0.59727	mixed_simpl	Low Activity	MAPK1:flank.sv:3	0.218908
TOP3B:flank.sv	0.09531	0.59727	mixed_simpl	Low Activity	TOP3B:flank.sv:3	0.218908
SMC6:flank.sv	0.095946	0.504134	mixed_simpl	Low Activity	SMC6:flank.sv:3	0.218908
SMC6:ExChr_amp	0.0987425	0.437251	mixed_simpl	Low Activity	SMC6:ExChr_amp:3	0.220995
MYCN:ExChr_amp	0.0987425	0.437251	mixed_simpl	Low Activity	MYCN:ExChr_amp:3	0.220995
TEC:flank.sv	0.101599	0.480056	mixed_simpl	Low Activity	TEC:flank.sv:3	0.222931
STK11:flank.sv	0.109236	0.513432	mixed_simpl	Low Activity	STK11:flank.sv:3	0.230273
POLR2E:flank.sv	0.109236	0.513432	mixed_simpl	Low Activity	POLR2E:flank.sv:3	0.230273
FAT1:flank.sv	0.109394	0.556325	mixed_simpl	Low Activity	FAT1:flank.sv:3	0.230273
MTNR1A:flank.sv	0.109394	0.556325	mixed_simpl	Low Activity	MTNR1A:flank.sv:3	0.230273
10q26.3_Del(MGMT)	0.109612	0.763676	mixed_simpl	Low Activity	10q26.3_Del(MGMT):3	0.230273
AKAP9:ExChr_amp	0.111558	0.218444	mixed_simpl	Low Activity	AKAP9:ExChr_amp:3	0.230979
CDK6:ExChr_amp	0.111558	0.218444	mixed_simpl	Low Activity	CDK6:ExChr_amp:3	0.230979
ELMO2:coding.sv	0.115615	0.332983	mixed_simpl	Low Activity	ELMO2:coding.sv:3	0.231938
SOX2:flank.sv	0.116034	0.515663	mixed_simpl	Low Activity	SOX2:flank.sv:3	0.231938
FIP1L1:coding.sv	0.125685	0.544684	mixed_simpl	Low Activity	FIP1L1:coding.sv:3	0.232109
8q24.21_Amp(MYC)	0.126756	0.648236	mixed_simpl	Low Activity	8q24.21_Amp(MYC):3	0.232896
MTAP:flank.sv	0.12825	0.637724	mixed_simpl	Low Activity	MTAP:flank.sv:3	0.23321
17p13.3_Del(TP53)	0.128748	0.723512	mixed_simpl	Low Activity	17p13.3_Del(TP53):3	0.23321
COL2A1:flank.sv	0.13	0.496812	mixed_simpl	Low Activity	COL2A1:flank.sv:3	0.23321
ROBO2:part.amp	0.134319	0.315518	mixed_simpl	Low Activity	ROBO2:part.amp:3	0.236863
AFF3:coding.sv	0.140434	0.400356	mixed_simpl	Low Activity	AFF3:coding.sv:3	0.240884
PRKD1:coding.sv	0.143126	0.401276	mixed_simpl	Low Activity	PRKD1:coding.sv:3	0.24388
EBF1:coding.sv	0.148551	0.218444	mixed_simpl	Low Activity	EBF1:coding.sv:3	0.249574
APEX2:flank.sv	0.150629	0.570209	mixed_simpl	Low Activity	APEX2:flank.sv:3	0.250466
KDM5C:flank.sv	0.150629	0.570209	mixed_simpl	Low Activity	KDM5C:flank.sv:3	0.250466
FIP1L1:part.amp	0.151355	0.561644	mixed_simpl	Low Activity	FIP1L1:part.amp:3	0.250865
HLF:flank.sv	0.152546	0.558136	mixed_simpl	Low Activity	HLF:flank.sv:3	0.251226
TP53:missense.snv	0.155087	0.812949	mixed_simpl	Low Activity	TP53:missense.snv:3	0.252737
SHFM1:coding.sv	0.159769	0.357966	mixed_simpl	Low Activity	SHFM1:coding.sv:3	0.257375
PTPN6:coding.sv	0.164883	0.255062	mixed_simpl	Low Activity	PTPN6:coding.sv:3	0.263557
KIT:flank.sv	0.170519	0.633856	mixed_simpl	Low Activity	KIT:flank.sv:3	0.26882
FIP1L1:flank.sv	0.191232	0.619499	mixed_simpl	Low Activity	FIP1L1:flank.sv:3	0.286545
SPECC1:coding.sv	0.198596	0.469897	mixed_simpl	Low Activity	SPECC1:coding.sv:3	0.295426
NTRK3:coding.sv	0.200502	0.377084	mixed_simpl	Low Activity	NTRK3:coding.sv:3	0.295426
CDH11:flank.sv	0.219165	0.634495	mixed_simpl	Low Activity	CDH11:flank.sv:3	0.305
EGFR:flank.sv	0.231642	0.60985	mixed_simpl	Low Activity	EGFR:flank.sv:3	0.312263
NFIB:flank.sv	0.232047	0.755982	mixed_simpl	Low Activity	NFIB:flank.sv:3	0.312335
PDGFRA:flank.sv	0.232301	0.689526	mixed_simpl	Low Activity	PDGFRA:flank.sv:3	0.312335
ALKBH3:flank.sv	0.239846	0.709339	mixed_simpl	Low Activity	ALKBH3:flank.sv:3	0.313499
EXT2:flank.sv	0.239846	0.709339	mixed_simpl	Low Activity	EXT2:flank.sv:3	0.313499
NDRG1:part.amp	0.243685	0.40777	mixed_simpl	Low Activity	NDRG1:part.amp:3	0.3137
TP53:coding.sv	0.255292	0.328531	mixed_simpl	Low Activity	TP53:coding.sv:3	0.323057
CDKN2B:homdel	0.265126	0.878852	mixed_simpl	Low Activity	CDKN2B:homdel:3	0.329672
CDKN2A:homdel	0.265126	0.878852	mixed_simpl	Low Activity	CDKN2A:homdel:3	0.329672
TERT:PROMOTER_snvs	0.272826	0.569722	mixed_simpl	Low Activity	TERT:PROMOTER_snvs:3	0.335967
19q13.43_Del	0.28102	0.819808	mixed_simpl	Low Activity	19q13.43_Del:3	0.340988
20q13.33_Del_b	0.284333	0.745628	mixed_simpl	Low Activity	20q13.33_Del_b:3	0.34299
20q13.33_Del_a	0.295875	0.70266	mixed_simpl	Low Activity	20q13.33_Del_a:3	0.349165
PTEN:coding.sv	0.298294	0.454189	mixed_simpl	Low Activity	PTEN:coding.sv:3	0.350229
FXR1:flank.sv	0.299026	0.675955	mixed_simpl	Low Activity	FXR1:flank.sv:3	0.350481
ERC1:part.amp	0.320038	0.513836	mixed_simpl	Low Activity	ERC1:part.amp:3	0.362035
ZNF479:flank.sv	0.349174	0.726618	mixed_simpl	Low Activity	ZNF479:flank.sv:3	0.371708
WWOX:coding.sv	0.354548	0.670756	mixed_simpl	Low Activity	WWOX:coding.sv:3	0.375879
RAD52:flank.sv	0.359092	0.727391	mixed_simpl	Low Activity	RAD52:flank.sv:3	0.377979
OPCML:coding.sv	0.360521	0.6075	mixed_simpl	Low Activity	OPCML:coding.sv:3	0.379077
H3F3A:p.K28M	0.373096	0.855914	mixed_simpl	Low Activity	H3F3A:p.K28M:3	0.383158
FIP1L1:intron.sv	0.398762	0.699895	mixed_simpl	Low Activity	FIP1L1:intron.sv:3	0.392153
4q12_Amp(PDGFRA)	0.403192	0.752892	mixed_simpl	Low Activity	4q12_Amp(PDGFRA):3	0.393512
APEX1:flank.sv	0.404983	0.738464	mixed_simpl	Low Activity	APEX1:flank.sv:3	0.393771
PARP2:flank.sv	0.404983	0.738464	mixed_simpl	Low Activity	PARP2:flank.sv:3	0.393771
CHD8:flank.sv	0.404983	0.738464	mixed_simpl	Low Activity	CHD8:flank.sv:3	0.393771
ERC1:flank.sv	0.409267	0.71159	mixed_simpl	Low Activity	ERC1:flank.sv:3	0.393982
8p23.1_Amp	0.412487	0.711584	mixed_simpl	Low Activity	8p23.1_Amp:3	0.394383
MTAP:homdel	0.436737	0.842797	mixed_simpl	Low Activity	MTAP:homdel:3	0.407147
CNTNAP2:coding.sv	0.465262	0.746194	mixed_simpl	Low Activity	CNTNAP2:coding.sv:3	0.419222
CTNNA2:flank.sv	0.468223	0.72038	mixed_simpl	Low Activity	CTNNA2:flank.sv:3	0.420789
CLOCK:ExChr_amp	0.481397	0.71084	mixed_simpl	Low Activity	CLOCK:ExChr_amp:3	0.424138
KDR:ExChr_amp	0.481397	0.71084	mixed_simpl	Low Activity	KDR:ExChr_amp:3	0.424138
SFRP4:part.amp	0.485672	0.617752	mixed_simpl	Low Activity	SFRP4:part.amp:3	0.424643
8q24.3_Del	0.499369	0.762708	mixed_simpl	Low Activity	8q24.3_Del:3	0.430453
NTRK2:coding.sv	0.500454	0.746645	mixed_simpl	Low Activity	NTRK2:coding.sv:3	0.430453
17q11.2_Del(NF1)	0.527398	0.71239	mixed_simpl	Low Activity	17q11.2_Del(NF1):3	0.440251
8p23.2_Del	0.530922	0.774173	mixed_simpl	Low Activity	8p23.2_Del:3	0.441764
CCDC26:flank.sv	0.534285	0.705667	mixed_simpl	Low Activity	CCDC26:flank.sv:3	0.44349
14q12_Del	0.553633	0.84737	mixed_simpl	Low Activity	14q12_Del:3	0.448729
20q11.21_Amp	0.56812	0.820016	mixed_simpl	Low Activity	20q11.21_Amp:3	0.449973
PDGFRA:ExChr_amp	0.572632	0.769938	mixed_simpl	Low Activity	PDGFRA:ExChr_amp:3	0.449973
FIP1L1:ExChr_amp	0.572632	0.769938	mixed_simpl	Low Activity	FIP1L1:ExChr_amp:3	0.449973
17p11.2_Amp	0.582646	0.735031	mixed_simpl	Low Activity	17p11.2_Amp:3	0.450329
FBXW7:missense.snv	0.583264	0.807015	mixed_simpl	Low Activity	FBXW7:missense.snv:3	0.450469
15q13.3_Del	0.586257	0.822728	mixed_simpl	Low Activity	15q13.3_Del:3	0.45185
CSNK1G3:coding.sv	0.599052	0.778924	mixed_simpl	Low Activity	CSNK1G3:coding.sv:3	0.456767
HDAC2:flank.sv	0.641774	0.818691	mixed_simpl	Low Activity	HDAC2:flank.sv:3	0.47514
ERBB4:coding.sv	0.665865	0.78409	mixed_simpl	Low Activity	ERBB4:coding.sv:3	0.482397
GPHN:coding.sv	0.669059	0.784695	mixed_simpl	Low Activity	GPHN:coding.sv:3	0.48296
CTNND1:coding.sv	0.680512	0.776945	mixed_simpl	Low Activity	CTNND1:coding.sv:3	0.485622
CLOCK:part.amp	0.689128	0.68804	mixed_simpl	Low Activity	CLOCK:part.amp:3	0.487392
CNBD1:coding.sv	0.706041	0.698889	mixed_simpl	Low Activity	CNBD1:coding.sv:3	0.492939
FRYL:truncating.snv	0.706041	0.756518	mixed_simpl	Low Activity	FRYL:truncating.snv:3	0.492939
CHIC2:flank.sv	0.722817	0.852775	mixed_simpl	Low Activity	CHIC2:flank.sv:3	0.500511
MSI2:part.amp	0.722848	0.838065	mixed_simpl	Low Activity	MSI2:part.amp:3	0.500511
7q21.2_Amp(CDK6)	0.732234	0.99829	mixed_simpl	Low Activity	7q21.2_Amp(CDK6):3	0.501755
NF1:coding.sv	0.7351	0.80757	mixed_simpl	Low Activity	NF1:coding.sv:3	0.502112
HUS1:part.amp	0.748945	0.819138	mixed_simpl	Low Activity	HUS1:part.amp:3	0.506216
IDH2:flank.sv	0.762027	0.851073	mixed_simpl	Low Activity	IDH2:flank.sv:3	0.507845
TCF12:coding.sv	0.774769	0.855961	mixed_simpl	Low Activity	TCF12:coding.sv:3	0.513166
FANCI:flank.sv	0.778497	0.998793	mixed_simpl	Low Activity	FANCI:flank.sv:3	0.513722
KIT:ExChr_amp	0.779053	0.834373	mixed_simpl	Low Activity	KIT:ExChr_amp:3	0.513722
CHIC2:ExChr_amp	0.789972	0.835605	mixed_simpl	Low Activity	CHIC2:ExChr_amp:3	0.518908
PDGFRA:coding.sv	0.823255	0.806428	mixed_simpl	Low Activity	PDGFRA:coding.sv:3	0.531761
PDGFRA:truncating.snv	0.844681	0.85937	mixed_simpl	Low Activity	PDGFRA:truncating.snv:3	0.541106
DCC:coding.sv	0.850536	0.725097	mixed_simpl	Low Activity	DCC:coding.sv:3	0.54291
CHIC2:amp	0.893739	0.875297	mixed_simpl	Low Activity	CHIC2:amp:3	0.558943
PTPRD:part.amp	0.905557	0.988956	mixed_simpl	Low Activity	PTPRD:part.amp:3	0.561945
5p15.33_Del	0.921178	0.990451	mixed_simpl	Low Activity	5p15.33_Del:3	0.567626
NOTCH2:part.amp	0.950857	0.950492	mixed_simpl	Low Activity	NOTCH2:part.amp:3	0.575008
MYC:ExChr_amp	0.972647	0.808896	mixed_simpl	Low Activity	MYC:ExChr_amp:3	0.579546
CCDC26:ExChr_amp	0.972647	0.808896	mixed_simpl	Low Activity	CCDC26:ExChr_amp:3	0.579546
TP53:truncating.snv	0.993545	0.970453	mixed_simpl	Low Activity	TP53:truncating.snv:3	0.583382
TERT:PROMOTER_snvs	0.00033288	2.93495	simpl_interchr	High Activity	TERT:PROMOTER_snvs:4	0.0245522
ACVR1:missense.snv	0.00177795	1.78776	simpl_interchr	High Activity	ACVR1:missense.snv:4	0.049415
FLG2:missense.snv	0.0183827	1.80594	simpl_interchr	High Activity	FLG2:missense.snv:4	0.117901
BCORL1:truncating.snv	0.0183828	2.60041	simpl_interchr	High Activity	BCORL1:truncating.snv:4	0.117901
HIST1H3C:missense.snv	0.0279794	2.37262	simpl_interchr	High Activity	HIST1H3C:missense.snv:4	0.133546
CTNND1:coding.sv	0.0366474	2.93519	simpl_interchr	High Activity	CTNND1:coding.sv:4	0.148984
PTPRD:truncating.snv	0.0379224	2.90555	simpl_interchr	High Activity	PTPRD:truncating.snv:4	0.15183
17q25.3_Del	0.0471702	1.76471	simpl_interchr	High Activity	17q25.3_Del:4	0.16684
CSF1R:missense.snv	0.0473408	2.02177	simpl_interchr	High Activity	CSF1R:missense.snv:4	0.16684
GPHN:coding.sv	0.0487504	1.8744	simpl_interchr	High Activity	GPHN:coding.sv:4	0.169494
DLC1:missense.snv	0.0563466	1.91027	simpl_interchr	High Activity	DLC1:missense.snv:4	0.182393
RB1:missense.snv	0.0644225	1.73785	simpl_interchr	High Activity	RB1:missense.snv:4	0.19451
SETD2:truncating.snv	0.064934	1.66385	simpl_interchr	High Activity	SETD2:truncating.snv:4	0.195483
CDC27:missense.snv	0.0656098	1.73525	simpl_interchr	High Activity	CDC27:missense.snv:4	0.196608
KMT2A:missense.snv	0.0702566	1.95414	simpl_interchr	High Activity	KMT2A:missense.snv:4	0.199917
BCLAF1:missense.snv	0.077452	1.73099	simpl_interchr	High Activity	BCLAF1:missense.snv:4	0.203047
MAX:missense.snv	0.0776419	1.85796	simpl_interchr	High Activity	MAX:missense.snv:4	0.203047
HIST1H3B:p.K28M	0.0899607	1.54431	simpl_interchr	High Activity	HIST1H3B:p.K28M:4	0.213548
YY2:missense.snv	0.0919872	2.34212	simpl_interchr	High Activity	YY2:missense.snv:4	0.214814
ATP8B3:missense.snv	0.0968607	1.46097	simpl_interchr	High Activity	ATP8B3:missense.snv:4	0.218908
FBXW7:missense.snv	0.0969894	1.93833	simpl_interchr	High Activity	FBXW7:missense.snv:4	0.218908
TSPAN16:missense.snv	0.101686	1.83189	simpl_interchr	High Activity	TSPAN16:missense.snv:4	0.222931
DCC:coding.sv	0.106435	2.2701	simpl_interchr	High Activity	DCC:coding.sv:4	0.228491
CLTCL1:missense.snv	0.106858	1.54617	simpl_interchr	High Activity	CLTCL1:missense.snv:4	0.228595
LRP1B:intron.sv	0.11162	1.76244	simpl_interchr	High Activity	LRP1B:intron.sv:4	0.230979
TOP1:missense.snv	0.119762	1.87733	simpl_interchr	High Activity	TOP1:missense.snv:4	0.231938
ANKRD11:truncating.snv	0.119762	1.85805	simpl_interchr	High Activity	ANKRD11:truncating.snv:4	0.231938
PIK3R1:missense.snv	0.120669	1.65516	simpl_interchr	High Activity	PIK3R1:missense.snv:4	0.231938
PDGFRL:missense.snv	0.124565	1.51461	simpl_interchr	High Activity	PDGFRL:missense.snv:4	0.232109
ALMS1:missense.snv	0.127557	1.34521	simpl_interchr	High Activity	ALMS1:missense.snv:4	0.23321
IRS2:missense.snv	0.129526	1.60753	simpl_interchr	High Activity	IRS2:missense.snv:4	0.23321
ZNF133:missense.snv	0.131796	1.67624	simpl_interchr	High Activity	ZNF133:missense.snv:4	0.233835
PTPRT:missense.snv	0.131796	1.67624	simpl_interchr	High Activity	PTPRT:missense.snv:4	0.233835
UBR5:missense.snv	0.134088	1.39719	simpl_interchr	High Activity	UBR5:missense.snv:4	0.236863
CUL4A:missense.snv	0.138792	1.49385	simpl_interchr	High Activity	CUL4A:missense.snv:4	0.239289
CTNNA2:missense.snv	0.141186	1.49055	simpl_interchr	High Activity	CTNNA2:missense.snv:4	0.241772
BIRC6:missense.snv	0.145019	1.38929	simpl_interchr	High Activity	BIRC6:missense.snv:4	0.246294
ZNF331:missense.snv	0.149258	1.62982	simpl_interchr	High Activity	ZNF331:missense.snv:4	0.249794
NOTCH1:missense.snv	0.160763	1.41689	simpl_interchr	High Activity	NOTCH1:missense.snv:4	0.258171
REV3L:missense.snv	0.165336	1.50674	simpl_interchr	High Activity	REV3L:missense.snv:4	0.263873
ANK1:missense.snv	0.167659	1.29978	simpl_interchr	High Activity	ANK1:missense.snv:4	0.266755
EGFR:missense.snv	0.175796	1.51722	simpl_interchr	High Activity	EGFR:missense.snv:4	0.272972
TYRO3:missense.snv	0.176627	1.34404	simpl_interchr	High Activity	TYRO3:missense.snv:4	0.27344
BCL11A:missense.snv	0.180523	1.55553	simpl_interchr	High Activity	BCL11A:missense.snv:4	0.275916
EYA1:missense.snv	0.1812	1.53829	simpl_interchr	High Activity	EYA1:missense.snv:4	0.276188
LIFR:missense.snv	0.183944	1.4575	simpl_interchr	High Activity	LIFR:missense.snv:4	0.279367
SELE:missense.snv	0.189901	1.5399	simpl_interchr	High Activity	SELE:missense.snv:4	0.285431
MUC16:missense.snv	0.200484	1.24136	simpl_interchr	High Activity	MUC16:missense.snv:4	0.295426
BCOR:truncating.snv	0.213396	1.38083	simpl_interchr	High Activity	BCOR:truncating.snv:4	0.300208
ATM:truncating.snv	0.22711	1.65901	simpl_interchr	High Activity	ATM:truncating.snv:4	0.309793
DDB1:missense.snv	0.228049	1.2522	simpl_interchr	High Activity	DDB1:missense.snv:4	0.310254
MAD1L1:coding.sv	0.238435	2.01173	simpl_interchr	High Activity	MAD1L1:coding.sv:4	0.312843
ESR1:missense.snv	0.243024	1.49314	simpl_interchr	High Activity	ESR1:missense.snv:4	0.3137
CSMD3:coding.sv	0.251339	1.38625	simpl_interchr	High Activity	CSMD3:coding.sv:4	0.320015
TCF7L2:missense.snv	0.25919	1.56255	simpl_interchr	High Activity	TCF7L2:missense.snv:4	0.327587
ZNF292:missense.snv	0.261859	1.27849	simpl_interchr	High Activity	ZNF292:missense.snv:4	0.329672
PDE4DIP:missense.snv	0.272154	1.32631	simpl_interchr	High Activity	PDE4DIP:missense.snv:4	0.335967
PTPN11:missense.snv	0.27493	1.12063	simpl_interchr	High Activity	PTPN11:missense.snv:4	0.335967
MED12:missense.snv	0.281695	1.34915	simpl_interchr	High Activity	MED12:missense.snv:4	0.341005
RGPD3:missense.snv	0.285222	1.31059	simpl_interchr	High Activity	RGPD3:missense.snv:4	0.343263
KRAS:missense.snv	0.308223	1.49428	simpl_interchr	High Activity	KRAS:missense.snv:4	0.356008
PTPRK:missense.snv	0.321208	1.2577	simpl_interchr	High Activity	PTPRK:missense.snv:4	0.362035
STAG2:missense.snv	0.321208	1.35571	simpl_interchr	High Activity	STAG2:missense.snv:4	0.362035
PPM1D:truncating.snv	0.323683	1.23702	simpl_interchr	High Activity	PPM1D:truncating.snv:4	0.362784
KMT2A:truncating.snv	0.331047	1.29752	simpl_interchr	High Activity	KMT2A:truncating.snv:4	0.367173
MED23:missense.snv	0.341525	1.21888	simpl_interchr	High Activity	MED23:missense.snv:4	0.369483
APC:missense.snv	0.341525	1.21888	simpl_interchr	High Activity	APC:missense.snv:4	0.369483
CUX1:missense.snv	0.341525	1.21888	simpl_interchr	High Activity	CUX1:missense.snv:4	0.369483
ARID1B:missense.snv	0.341525	1.21888	simpl_interchr	High Activity	ARID1B:missense.snv:4	0.369483
SETD1B:missense.snv	0.341525	1.21888	simpl_interchr	High Activity	SETD1B:missense.snv:4	0.369483
PDGFRA:coding.sv	0.342433	1.56406	simpl_interchr	High Activity	PDGFRA:coding.sv:4	0.369483
CHD8:truncating.snv	0.342433	1.29803	simpl_interchr	High Activity	CHD8:truncating.snv:4	0.369483
RGS7:part.amp	0.345427	1.65996	simpl_interchr	High Activity	RGS7:part.amp:4	0.370748
SHFM1:coding.sv	0.347963	1.58043	simpl_interchr	High Activity	SHFM1:coding.sv:4	0.370801
AKT3:missense.snv	0.347963	1.46067	simpl_interchr	High Activity	AKT3:missense.snv:4	0.370801
WWOX:coding.sv	0.347963	1.74399	simpl_interchr	High Activity	WWOX:coding.sv:4	0.370801
POLD1:missense.snv	0.353708	1.29024	simpl_interchr	High Activity	POLD1:missense.snv:4	0.375374
ZNF292:truncating.snv	0.358356	1.18663	simpl_interchr	High Activity	ZNF292:truncating.snv:4	0.377979
WWOX:missense.snv	0.371983	1.3909	simpl_interchr	High Activity	WWOX:missense.snv:4	0.383158
TFDP2:truncating.snv	0.371983	1.3909	simpl_interchr	High Activity	TFDP2:truncating.snv:4	0.383158
ARID2:truncating.snv	0.371983	1.3909	simpl_interchr	High Activity	ARID2:truncating.snv:4	0.383158
PTEN:missense.snv	0.384387	1.09838	simpl_interchr	High Activity	PTEN:missense.snv:4	0.388572
DICER1:missense.snv	0.38704	1.16358	simpl_interchr	High Activity	DICER1:missense.snv:4	0.389529
CHD2:missense.snv	0.389844	1.24243	simpl_interchr	High Activity	CHD2:missense.snv:4	0.39007
MUC4:missense.snv	0.389844	1.24243	simpl_interchr	High Activity	MUC4:missense.snv:4	0.39007
ANKRD11:missense.snv	0.391409	1.13704	simpl_interchr	High Activity	ANKRD11:missense.snv:4	0.390124
PDGFRA:truncating.snv	0.401893	1.32013	simpl_interchr	High Activity	PDGFRA:truncating.snv:4	0.393362
FIP1L1:intron.sv	0.40728	1.32623	simpl_interchr	High Activity	FIP1L1:intron.sv:4	0.393982
RALGAPB:missense.snv	0.412922	1.19054	simpl_interchr	High Activity	RALGAPB:missense.snv:4	0.394434
SFRP4:part.amp	0.416422	1.42739	simpl_interchr	High Activity	SFRP4:part.amp:4	0.395584
PRKD1:missense.snv	0.431903	1.23416	simpl_interchr	High Activity	PRKD1:missense.snv:4	0.405438
NOTCH2:part.amp	0.436094	1.18643	simpl_interchr	High Activity	NOTCH2:part.amp:4	0.407147
SMARCA4:missense.snv	0.448757	1.07258	simpl_interchr	High Activity	SMARCA4:missense.snv:4	0.412521
CHIC2:flank.sv	0.455917	1.12038	simpl_interchr	High Activity	CHIC2:flank.sv:4	0.415009
MGA:truncating.snv	0.458931	1.48189	simpl_interchr	High Activity	MGA:truncating.snv:4	0.416791
CCT7:missense.snv	0.463848	1.18921	simpl_interchr	High Activity	CCT7:missense.snv:4	0.419222
CTCF:missense.snv	0.464636	1.26167	simpl_interchr	High Activity	CTCF:missense.snv:4	0.419222
CCR7:missense.snv	0.464983	1.2797	simpl_interchr	High Activity	CCR7:missense.snv:4	0.419222
NCOR1:missense.snv	0.481132	1.11009	simpl_interchr	High Activity	NCOR1:missense.snv:4	0.424138
CSNK1G3:coding.sv	0.499487	1.54705	simpl_interchr	High Activity	CSNK1G3:coding.sv:4	0.430453
SETBP1:missense.snv	0.505794	1.25805	simpl_interchr	High Activity	SETBP1:missense.snv:4	0.43157
EBF1:coding.sv	0.506727	1.78877	simpl_interchr	High Activity	EBF1:coding.sv:4	0.43157
AKT3:part.amp	0.506786	1.31701	simpl_interchr	High Activity	AKT3:part.amp:4	0.43157
SPECC1:coding.sv	0.508561	1.35667	simpl_interchr	High Activity	SPECC1:coding.sv:4	0.431894
CRTC3:missense.snv	0.53653	1.15718	simpl_interchr	High Activity	CRTC3:missense.snv:4	0.444639
KMT2C:missense.snv	0.539168	1.11826	simpl_interchr	High Activity	KMT2C:missense.snv:4	0.444715
BRAF:missense.snv	0.543105	1.19399	simpl_interchr	High Activity	BRAF:missense.snv:4	0.444715
KEAP1:missense.snv	0.550192	1.08932	simpl_interchr	High Activity	KEAP1:missense.snv:4	0.44759
DIS3L2:missense.snv	0.562159	1.0743	simpl_interchr	High Activity	DIS3L2:missense.snv:4	0.449973
IGF2R:missense.snv	0.562979	1.38014	simpl_interchr	High Activity	IGF2R:missense.snv:4	0.449973
MAP3K1:missense.snv	0.574251	1.07124	simpl_interchr	High Activity	MAP3K1:missense.snv:4	0.449973
LRRC37B:missense.snv	0.574342	1.05586	simpl_interchr	High Activity	LRRC37B:missense.snv:4	0.449973
FAT4:missense.snv	0.581566	1.15197	simpl_interchr	High Activity	FAT4:missense.snv:4	0.450167
WNK2:missense.snv	0.581566	1.15197	simpl_interchr	High Activity	WNK2:missense.snv:4	0.450167
NCOR2:missense.snv	0.581566	1.15197	simpl_interchr	High Activity	NCOR2:missense.snv:4	0.450167
ARID1A:missense.snv	0.581566	1.15197	simpl_interchr	High Activity	ARID1A:missense.snv:4	0.450167
AKAP9:missense.snv	0.581566	1.15197	simpl_interchr	High Activity	AKAP9:missense.snv:4	0.450167
PRDM2:missense.snv	0.581566	1.15197	simpl_interchr	High Activity	PRDM2:missense.snv:4	0.450167
MTOR:missense.snv	0.581566	1.15197	simpl_interchr	High Activity	MTOR:missense.snv:4	0.450167
MYH11:missense.snv	0.586365	1.05745	simpl_interchr	High Activity	MYH11:missense.snv:4	0.45185
RALGDS:missense.snv	0.592615	1.06712	simpl_interchr	High Activity	RALGDS:missense.snv:4	0.453609
RANBP2:missense.snv	0.592615	1.06712	simpl_interchr	High Activity	RANBP2:missense.snv:4	0.453609
SPEN:missense.snv	0.592615	1.06712	simpl_interchr	High Activity	SPEN:missense.snv:4	0.453609
MUC20:missense.snv	0.592615	1.06712	simpl_interchr	High Activity	MUC20:missense.snv:4	0.453609
MCM7:missense.snv	0.601737	1.12815	simpl_interchr	High Activity	MCM7:missense.snv:4	0.456952
PLCG1:missense.snv	0.601737	1.12815	simpl_interchr	High Activity	PLCG1:missense.snv:4	0.456952
PDGFRA:part.amp	0.606513	1.4272	simpl_interchr	High Activity	PDGFRA:part.amp:4	0.459153
STAT3:missense.snv	0.611245	1.06042	simpl_interchr	High Activity	STAT3:missense.snv:4	0.461382
ARHGEF10:missense.snv	0.623807	1.21029	simpl_interchr	High Activity	ARHGEF10:missense.snv:4	0.468126
TERT:missense.snv	0.636784	1.11921	simpl_interchr	High Activity	TERT:missense.snv:4	0.474417
PIK3CA:missense.snv	0.64001	1.07781	simpl_interchr	High Activity	PIK3CA:missense.snv:4	0.47514
6q25.2_Del	0.640561	1.11566	simpl_interchr	High Activity	6q25.2_Del:4	0.47514
2p25.1_Amp(KIDINS220)	0.657303	1.03598	simpl_interchr	High Activity	2p25.1_Amp(KIDINS220):4	0.480347
PPFIA1:missense.snv	0.66819	1.11308	simpl_interchr	High Activity	PPFIA1:missense.snv:4	0.48296
DNMBP:missense.snv	0.675127	1.15228	simpl_interchr	High Activity	DNMBP:missense.snv:4	0.485132
MTNR1A:missense.snv	0.675127	1.15228	simpl_interchr	High Activity	MTNR1A:missense.snv:4	0.485132
HDAC2:flank.sv	0.677348	1.09388	simpl_interchr	High Activity	HDAC2:flank.sv:4	0.485461
RLIM:missense.snv	0.688715	1.30896	simpl_interchr	High Activity	RLIM:missense.snv:4	0.487392
MSI2:coding.sv	0.697162	1.09535	simpl_interchr	High Activity	MSI2:coding.sv:4	0.490539
MSI2:part.amp	0.716368	1.24712	simpl_interchr	High Activity	MSI2:part.amp:4	0.497793
ZNF479:flank.sv	0.722136	1.08962	simpl_interchr	High Activity	ZNF479:flank.sv:4	0.500511
DNMT3A:missense.snv	0.727291	1.0438	simpl_interchr	High Activity	DNMT3A:missense.snv:4	0.501342
NF1:missense.snv	0.727291	1.0438	simpl_interchr	High Activity	NF1:missense.snv:4	0.501342
FGFR1:missense.snv	0.727291	1.0016	simpl_interchr	High Activity	FGFR1:missense.snv:4	0.501342
TGM4:missense.snv	0.731624	1.04115	simpl_interchr	High Activity	TGM4:missense.snv:4	0.501755
BIRC6:truncating.snv	0.739946	1.25959	simpl_interchr	High Activity	BIRC6:truncating.snv:4	0.502675
TDP2:missense.snv	0.739946	1.25959	simpl_interchr	High Activity	TDP2:missense.snv:4	0.502675
ATR:missense.snv	0.748188	1.00156	simpl_interchr	High Activity	ATR:missense.snv:4	0.506216
TRRAP:missense.snv	0.755933	1.03861	simpl_interchr	High Activity	TRRAP:missense.snv:4	0.507845
ANKRD11:part.amp	0.757296	1.45379	simpl_interchr	High Activity	ANKRD11:part.amp:4	0.507845
20q11.21_Del	0.766713	1.1443	simpl_interchr	High Activity	20q11.21_Del:4	0.509792
FIP1L1:coding.sv	0.77242	1.07634	simpl_interchr	High Activity	FIP1L1:coding.sv:4	0.511938
KMT2C:truncating.snv	0.776932	1.0486	simpl_interchr	High Activity	KMT2C:truncating.snv:4	0.513722
ROBO2:part.amp	0.818936	1.16015	simpl_interchr	High Activity	ROBO2:part.amp:4	0.531105
ERC1:part.amp	0.890755	1.17722	simpl_interchr	High Activity	ERC1:part.amp:4	0.557788
FANCI:flank.sv	0.899298	1.04489	simpl_interchr	High Activity	FANCI:flank.sv:4	0.560225
ERBB4:coding.sv	0.901107	1.06169	simpl_interchr	High Activity	ERBB4:coding.sv:4	0.560225
NTRK3:coding.sv	0.908875	1.25652	simpl_interchr	High Activity	NTRK3:coding.sv:4	0.563665
SPECC1:part.amp	0.916867	1.04701	simpl_interchr	High Activity	SPECC1:part.amp:4	0.566919
MET:part.amp	0.927608	1.65252	simpl_interchr	High Activity	MET:part.amp:4	0.568792
AFF3:coding.sv	0.940567	1.05829	simpl_interchr	High Activity	AFF3:coding.sv:4	0.572784
TOP3B:flank.sv	0.94133	1.08748	simpl_interchr	High Activity	TOP3B:flank.sv:4	0.572784
MAPK1:flank.sv	0.94133	1.08748	simpl_interchr	High Activity	MAPK1:flank.sv:4	0.572784
EXT2:flank.sv	0.946376	1.06903	simpl_interchr	High Activity	EXT2:flank.sv:4	0.573395
ALKBH3:flank.sv	0.946376	1.06903	simpl_interchr	High Activity	ALKBH3:flank.sv:4	0.573395
ARID1B:truncating.snv	0.972608	1.10458	simpl_interchr	High Activity	ARID1B:truncating.snv:4	0.579546
FLG2:amp	0.983272	1.33452	simpl_interchr	High Activity	FLG2:amp:4	0.581764
TET1:missense.snv	0.996034	1.02094	simpl_interchr	High Activity	TET1:missense.snv:4	0.583382
POT1:missense.snv	0.996034	1.02094	simpl_interchr	High Activity	POT1:missense.snv:4	0.583382
INPPL1:missense.snv	0.996034	1.02094	simpl_interchr	High Activity	INPPL1:missense.snv:4	0.583382
NTRK3:missense.snv	0.996034	1.02094	simpl_interchr	High Activity	NTRK3:missense.snv:4	0.583382
PTPRD:coding.sv	0.00410019	0.229822	simpl_interchr	Low Activity	PTPRD:coding.sv:4	0.0647116
CLOCK:part.amp	0.0162346	4.69746e-226	simpl_interchr	Low Activity	CLOCK:part.amp:4	0.111759
10q23.31_Del(PTEN)	0.0173601	0.609672	simpl_interchr	Low Activity	10q23.31_Del(PTEN):4	0.116161
10q26.3_Del(MGMT)	0.019432	0.635668	simpl_interchr	Low Activity	10q26.3_Del(MGMT):4	0.121609
EGFR:flank.sv	0.0220503	0.181826	simpl_interchr	Low Activity	EGFR:flank.sv:4	0.124254
CNTNAP2:part.amp	0.0345624	0.217137	simpl_interchr	Low Activity	CNTNAP2:part.amp:4	0.145145
ELMO2:coding.sv	0.0391348	0.109475	simpl_interchr	Low Activity	ELMO2:coding.sv:4	0.153781
17p13.3_Del(TP53)	0.0416554	0.549957	simpl_interchr	Low Activity	17p13.3_Del(TP53):4	0.159237
EGFR:coding.sv	0.0430729	0.119885	simpl_interchr	Low Activity	EGFR:coding.sv:4	0.160567
EGFR:ExChr_amp	0.0430729	0.119885	simpl_interchr	Low Activity	EGFR:ExChr_amp:4	0.160567
NF1:truncating.snv	0.0471688	0.477514	simpl_interchr	Low Activity	NF1:truncating.snv:4	0.16684
SMC6:ExChr_amp	0.050538	0.241479	simpl_interchr	Low Activity	SMC6:ExChr_amp:4	0.17054
MYCN:ExChr_amp	0.050538	0.241479	simpl_interchr	Low Activity	MYCN:ExChr_amp:4	0.17054
7q21.2_Amp(CDK6)	0.0528966	0.649339	simpl_interchr	Low Activity	7q21.2_Amp(CDK6):4	0.175581
FSTL3:flank.sv	0.0615137	0.434549	simpl_interchr	Low Activity	FSTL3:flank.sv:4	0.190305
ELANE:flank.sv	0.0615137	0.434549	simpl_interchr	Low Activity	ELANE:flank.sv:4	0.190305
CDK6:coding.sv	0.0741754	0.116538	simpl_interchr	Low Activity	CDK6:coding.sv:4	0.199917
19q13.43_Del	0.0878572	0.594821	simpl_interchr	Low Activity	19q13.43_Del:4	0.212877
EXT2:coding.sv	0.0894523	0.0444657	simpl_interchr	Low Activity	EXT2:coding.sv:4	0.212877
SMC6:flank.sv	0.0917246	0.405189	simpl_interchr	Low Activity	SMC6:flank.sv:4	0.214814
8q24.21_Amp(MYC)	0.0919629	0.602593	simpl_interchr	Low Activity	8q24.21_Amp(MYC):4	0.214814
CTNND1:flank.sv	0.0926734	0.647066	simpl_interchr	Low Activity	CTNND1:flank.sv:4	0.215044
MAP2K4:coding.sv	0.0969894	0.0803103	simpl_interchr	Low Activity	MAP2K4:coding.sv:4	0.218908
HUS1:part.amp	0.101686	0.100907	simpl_interchr	Low Activity	HUS1:part.amp:4	0.222931
CCDC26:ExChr_amp	0.11162	0.202396	simpl_interchr	Low Activity	CCDC26:ExChr_amp:4	0.230979
MYC:ExChr_amp	0.11162	0.202396	simpl_interchr	Low Activity	MYC:ExChr_amp:4	0.230979
4q12_Amp(PDGFRA)	0.112234	0.597972	simpl_interchr	Low Activity	4q12_Amp(PDGFRA):4	0.231784
MET:ExChr_amp	0.119762	0.261504	simpl_interchr	Low Activity	MET:ExChr_amp:4	0.231938
TP53:missense.snv	0.120337	0.721888	simpl_interchr	Low Activity	TP53:missense.snv:4	0.231938
SETD1B:truncating.snv	0.121825	0.406537	simpl_interchr	Low Activity	SETD1B:truncating.snv:4	0.231938
PTPRD:flank.sv	0.122851	0.612983	simpl_interchr	Low Activity	PTPRD:flank.sv:4	0.231938
KDR:flank.sv	0.122984	0.643271	simpl_interchr	Low Activity	KDR:flank.sv:4	0.231938
MAP3K13:part.amp	0.125097	0.134175	simpl_interchr	Low Activity	MAP3K13:part.amp:4	0.232109
POLR2E:flank.sv	0.125335	0.491795	simpl_interchr	Low Activity	POLR2E:flank.sv:4	0.232109
STK11:flank.sv	0.125335	0.491795	simpl_interchr	Low Activity	STK11:flank.sv:4	0.232109
CDK6:ExChr_amp	0.125878	0.131217	simpl_interchr	Low Activity	CDK6:ExChr_amp:4	0.232109
AKAP9:ExChr_amp	0.125878	0.131217	simpl_interchr	Low Activity	AKAP9:ExChr_amp:4	0.232109
H3F3A:p.K28M	0.128457	0.729769	simpl_interchr	Low Activity	H3F3A:p.K28M:4	0.23321
FIP1L1:ExChr_amp	0.1302	0.50924	simpl_interchr	Low Activity	FIP1L1:ExChr_amp:4	0.23321
PDGFRA:ExChr_amp	0.1302	0.50924	simpl_interchr	Low Activity	PDGFRA:ExChr_amp:4	0.23321
12p12.1_Amp	0.136234	0.437267	simpl_interchr	Low Activity	12p12.1_Amp:4	0.236863
MET:flank.sv	0.138957	0.578831	simpl_interchr	Low Activity	MET:flank.sv:4	0.239289
7q31.2_Amp(MET)	0.145784	0.717521	simpl_interchr	Low Activity	7q31.2_Amp(MET):4	0.246377
PTPN6:coding.sv	0.147982	0.0349953	simpl_interchr	Low Activity	PTPN6:coding.sv:4	0.249574
SDHA:flank.sv	0.149784	0.604208	simpl_interchr	Low Activity	SDHA:flank.sv:4	0.250269
CDKN2B:homdel	0.155797	0.727453	simpl_interchr	Low Activity	CDKN2B:homdel:4	0.252737
CDKN2A:homdel	0.155797	0.727453	simpl_interchr	Low Activity	CDKN2A:homdel:4	0.252737
KIT:ExChr_amp	0.155911	0.527177	simpl_interchr	Low Activity	KIT:ExChr_amp:4	0.252737
PTPRD:part.amp	0.160092	0.193752	simpl_interchr	Low Activity	PTPRD:part.amp:4	0.257493
ATRX:missense.snv	0.166906	0.575821	simpl_interchr	Low Activity	ATRX:missense.snv:4	0.265968
GPC5:coding.sv	0.171659	0.32708	simpl_interchr	Low Activity	GPC5:coding.sv:4	0.269794
ID2:ExChr_amp	0.177976	0.276466	simpl_interchr	Low Activity	ID2:ExChr_amp:4	0.274553
CHIC2:ExChr_amp	0.187041	0.550951	simpl_interchr	Low Activity	CHIC2:ExChr_amp:4	0.28278
PRKD1:coding.sv	0.197967	0.316448	simpl_interchr	Low Activity	PRKD1:coding.sv:4	0.295426
KDM5A:flank.sv	0.201706	0.643093	simpl_interchr	Low Activity	KDM5A:flank.sv:4	0.295426
MTNR1A:flank.sv	0.208545	0.631888	simpl_interchr	Low Activity	MTNR1A:flank.sv:4	0.297435
FAT1:flank.sv	0.208545	0.631888	simpl_interchr	Low Activity	FAT1:flank.sv:4	0.297435
KMT2C:part.amp	0.220692	0.279368	simpl_interchr	Low Activity	KMT2C:part.amp:4	0.305784
MLLT3:flank.sv	0.220913	0.733069	simpl_interchr	Low Activity	MLLT3:flank.sv:4	0.305784
MLLT3:coding.sv	0.230988	0.70191	simpl_interchr	Low Activity	MLLT3:coding.sv:4	0.311787
RAD52:flank.sv	0.232643	0.615984	simpl_interchr	Low Activity	RAD52:flank.sv:4	0.312388
CLOCK:flank.sv	0.245698	0.747631	simpl_interchr	Low Activity	CLOCK:flank.sv:4	0.315164
TERT:flank.sv	0.246084	0.684472	simpl_interchr	Low Activity	TERT:flank.sv:4	0.31521
CNTNAP2:coding.sv	0.246344	0.359138	simpl_interchr	Low Activity	CNTNAP2:coding.sv:4	0.31521
FIP1L1:part.amp	0.253296	0.715688	simpl_interchr	Low Activity	FIP1L1:part.amp:4	0.321347
ETV1:part.amp	0.26341	0.353057	simpl_interchr	Low Activity	ETV1:part.amp:4	0.329672
PTEN:coding.sv	0.276886	0.39963	simpl_interchr	Low Activity	PTEN:coding.sv:4	0.337558
NDRG1:part.amp	0.292339	0.338593	simpl_interchr	Low Activity	NDRG1:part.amp:4	0.346577
7p11.2_Amp(EGFR)	0.29378	0.756336	simpl_interchr	Low Activity	7p11.2_Amp(EGFR):4	0.347886
KDM5A:coding.sv	0.303528	0.365992	simpl_interchr	Low Activity	KDM5A:coding.sv:4	0.352159
14q12_Del	0.315759	0.727841	simpl_interchr	Low Activity	14q12_Del:4	0.361077
HLF:flank.sv	0.31953	0.668792	simpl_interchr	Low Activity	HLF:flank.sv:4	0.362035
7p15.1_Amp	0.33387	0.784803	simpl_interchr	Low Activity	7p15.1_Amp:4	0.369483
ERC1:flank.sv	0.343312	0.682246	simpl_interchr	Low Activity	ERC1:flank.sv:4	0.370045
ERC1:coding.sv	0.344529	0.728373	simpl_interchr	Low Activity	ERC1:coding.sv:4	0.370748
KDR:ExChr_amp	0.347187	0.606075	simpl_interchr	Low Activity	KDR:ExChr_amp:4	0.370801
CLOCK:ExChr_amp	0.347187	0.606075	simpl_interchr	Low Activity	CLOCK:ExChr_amp:4	0.370801
COL2A1:flank.sv	0.358977	0.598447	simpl_interchr	Low Activity	COL2A1:flank.sv:4	0.377979
MET:coding.sv	0.363031	0.509175	simpl_interchr	Low Activity	MET:coding.sv:4	0.379802
NF1:coding.sv	0.393558	0.570123	simpl_interchr	Low Activity	NF1:coding.sv:4	0.390761
DDB2:flank.sv	0.395833	0.638088	simpl_interchr	Low Activity	DDB2:flank.sv:4	0.390761
NTRK2:coding.sv	0.395833	0.659343	simpl_interchr	Low Activity	NTRK2:coding.sv:4	0.390761
CCDC26:flank.sv	0.399318	0.836338	simpl_interchr	Low Activity	CCDC26:flank.sv:4	0.392326
MTAP:flank.sv	0.403614	0.769198	simpl_interchr	Low Activity	MTAP:flank.sv:4	0.393551
CCDC26:part.amp	0.425575	0.688745	simpl_interchr	Low Activity	CCDC26:part.amp:4	0.40169
13q14.2_Del(RB1)	0.429149	0.757606	simpl_interchr	Low Activity	13q14.2_Del(RB1):4	0.403587
ZNF676:missense.snv	0.435172	0.449128	simpl_interchr	Low Activity	ZNF676:missense.snv:4	0.407147
H3F3A:missense.snv	0.435401	0.772901	simpl_interchr	Low Activity	H3F3A:missense.snv:4	0.407147
TCF12:coding.sv	0.437888	0.351701	simpl_interchr	Low Activity	TCF12:coding.sv:4	0.407147
POLR2I:flank.sv	0.439243	0.770289	simpl_interchr	Low Activity	POLR2I:flank.sv:4	0.407147
IDH1:missense.snv	0.439243	0.708498	simpl_interchr	Low Activity	IDH1:missense.snv:4	0.407147
CLOCK:coding.sv	0.441044	0.965113	simpl_interchr	Low Activity	CLOCK:coding.sv:4	0.408084
FIP1L1:flank.sv	0.44822	0.796169	simpl_interchr	Low Activity	FIP1L1:flank.sv:4	0.412505
8q24.21_Amp(CCDC26)	0.449195	0.792176	simpl_interchr	Low Activity	8q24.21_Amp(CCDC26):4	0.412521
KMT2C:coding.sv	0.456894	0.604166	simpl_interchr	Low Activity	KMT2C:coding.sv:4	0.415306
OPCML:coding.sv	0.463848	0.427374	simpl_interchr	Low Activity	OPCML:coding.sv:4	0.419222
LIG1:missense.snv	0.475598	0.579507	simpl_interchr	Low Activity	LIG1:missense.snv:4	0.423364
TP53:coding.sv	0.480266	0.38052	simpl_interchr	Low Activity	TP53:coding.sv:4	0.424138
PML:missense.snv	0.481132	0.581143	simpl_interchr	Low Activity	PML:missense.snv:4	0.424138
CTNNA2:flank.sv	0.49269	0.743426	simpl_interchr	Low Activity	CTNNA2:flank.sv:4	0.428602
TP53:truncating.snv	0.494909	0.736333	simpl_interchr	Low Activity	TP53:truncating.snv:4	0.429808
NFIB:flank.sv	0.499556	0.776821	simpl_interchr	Low Activity	NFIB:flank.sv:4	0.430453
9p21.3_Del(CDKN2A)	0.502482	0.790254	simpl_interchr	Low Activity	9p21.3_Del(CDKN2A):4	0.431307
HIST1H3B:p.R27R	0.506786	0.59878	simpl_interchr	Low Activity	HIST1H3B:p.R27R:4	0.43157
LSM14A:flank.sv	0.520449	0.83681	simpl_interchr	Low Activity	LSM14A:flank.sv:4	0.437034
PTEN:truncating.snv	0.528424	0.917048	simpl_interchr	Low Activity	PTEN:truncating.snv:4	0.440751
RB1:coding.sv	0.53248	0.838816	simpl_interchr	Low Activity	RB1:coding.sv:4	0.442703
MTAP:homdel	0.539064	0.90597	simpl_interchr	Low Activity	MTAP:homdel:4	0.444715
GPC3:missense.snv	0.540952	0.778624	simpl_interchr	Low Activity	GPC3:missense.snv:4	0.444715
17p11.2_Amp	0.551556	0.531629	simpl_interchr	Low Activity	17p11.2_Amp:4	0.447986
TCF12:missense.snv	0.574342	0.935549	simpl_interchr	Low Activity	TCF12:missense.snv:4	0.449973
PBRM1:truncating.snv	0.580342	0.620066	simpl_interchr	Low Activity	PBRM1:truncating.snv:4	0.450167
ATRX:truncating.snv	0.593041	0.788162	simpl_interchr	Low Activity	ATRX:truncating.snv:4	0.453609
5p15.33_Del	0.602895	0.948467	simpl_interchr	Low Activity	5p15.33_Del:4	0.45742
CDKN2C:missense.snv	0.619747	0.68216	simpl_interchr	Low Activity	CDKN2C:missense.snv:4	0.466095
8p23.2_Del	0.649096	0.654123	simpl_interchr	Low Activity	8p23.2_Del:4	0.47514
ARHGAP26:missense.snv	0.649258	0.790487	simpl_interchr	Low Activity	ARHGAP26:missense.snv:4	0.47514
ANKRD52:missense.snv	0.649258	0.972494	simpl_interchr	Low Activity	ANKRD52:missense.snv:4	0.47514
LARP4B:flank.sv	0.659447	0.93544	simpl_interchr	Low Activity	LARP4B:flank.sv:4	0.480892
KIT:flank.sv	0.674294	0.848772	simpl_interchr	Low Activity	KIT:flank.sv:4	0.485132
20q13.33_Del_a	0.683689	0.978511	simpl_interchr	Low Activity	20q13.33_Del_a:4	0.486209
PDGFRA:flank.sv	0.687222	0.854937	simpl_interchr	Low Activity	PDGFRA:flank.sv:4	0.487392
TDG:coding.sv	0.690361	0.970434	simpl_interchr	Low Activity	TDG:coding.sv:4	0.487596
CHD8:flank.sv	0.704646	0.73272	simpl_interchr	Low Activity	CHD8:flank.sv:4	0.492939
APEX1:flank.sv	0.704646	0.73272	simpl_interchr	Low Activity	APEX1:flank.sv:4	0.492939
PARP2:flank.sv	0.704646	0.73272	simpl_interchr	Low Activity	PARP2:flank.sv:4	0.492939
PABPC1:missense.snv	0.708006	0.943439	simpl_interchr	Low Activity	PABPC1:missense.snv:4	0.493643
PDGFRA:amp	0.724158	0.915679	simpl_interchr	Low Activity	PDGFRA:amp:4	0.500511
KIT:amp	0.724158	0.915679	simpl_interchr	Low Activity	KIT:amp:4	0.500511
SETD1A:missense.snv	0.735478	0.777109	simpl_interchr	Low Activity	SETD1A:missense.snv:4	0.502112
15q13.3_Del	0.756299	0.818983	simpl_interchr	Low Activity	15q13.3_Del:4	0.507845
COL1A1:missense.snv	0.759478	0.713827	simpl_interchr	Low Activity	COL1A1:missense.snv:4	0.507845
CNBD1:flank.sv	0.766013	0.788457	simpl_interchr	Low Activity	CNBD1:flank.sv:4	0.509654
17q11.2_Del(NF1)	0.769804	0.699068	simpl_interchr	Low Activity	17q11.2_Del(NF1):4	0.510532
4q35.1_Del	0.776207	0.880421	simpl_interchr	Low Activity	4q35.1_Del:4	0.513722
ATRX:coding.sv	0.779093	0.708508	simpl_interchr	Low Activity	ATRX:coding.sv:4	0.513722
ELMO2:truncating.snv	0.783549	0.652402	simpl_interchr	Low Activity	ELMO2:truncating.snv:4	0.516002
IDH2:flank.sv	0.784914	0.895867	simpl_interchr	Low Activity	IDH2:flank.sv:4	0.516572
FAF1:coding.sv	0.790744	0.935567	simpl_interchr	Low Activity	FAF1:coding.sv:4	0.519085
ASXL1:truncating.snv	0.79366	0.811044	simpl_interchr	Low Activity	ASXL1:truncating.snv:4	0.520007
2p24.3_Amp(MYCN)	0.794864	0.917696	simpl_interchr	Low Activity	2p24.3_Amp(MYCN):4	0.520466
LRP1B:missense.snv	0.796593	0.998827	simpl_interchr	Low Activity	LRP1B:missense.snv:4	0.520938
LRP1B:coding.sv	0.800657	0.836496	simpl_interchr	Low Activity	LRP1B:coding.sv:4	0.522933
CTNND2:missense.snv	0.802827	0.960678	simpl_interchr	Low Activity	CTNND2:missense.snv:4	0.524019
FAM47C:missense.snv	0.830756	0.686681	simpl_interchr	Low Activity	FAM47C:missense.snv:4	0.535813
DROSHA:missense.snv	0.837814	0.962066	simpl_interchr	Low Activity	DROSHA:missense.snv:4	0.538683
SOX2:flank.sv	0.840092	0.799308	simpl_interchr	Low Activity	SOX2:flank.sv:4	0.539695
RERE:missense.snv	0.843742	0.898832	simpl_interchr	Low Activity	RERE:missense.snv:4	0.541106
FRYL:truncating.snv	0.845724	0.994416	simpl_interchr	Low Activity	FRYL:truncating.snv:4	0.541134
CCDC26:coding.sv	0.856835	0.861175	simpl_interchr	Low Activity	CCDC26:coding.sv:4	0.544472
ACVR1:truncating.snv	0.86189	0.904439	simpl_interchr	Low Activity	ACVR1:truncating.snv:4	0.545238
ALK:coding.sv	0.863685	0.94087	simpl_interchr	Low Activity	ALK:coding.sv:4	0.545801
2p25.1_Amp	0.877068	0.982573	simpl_interchr	Low Activity	2p25.1_Amp:4	0.552319
KDM5C:flank.sv	0.887678	0.891107	simpl_interchr	Low Activity	KDM5C:flank.sv:4	0.556198
APEX2:flank.sv	0.887678	0.891107	simpl_interchr	Low Activity	APEX2:flank.sv:4	0.556198
8p23.1_Amp	0.902326	0.878653	simpl_interchr	Low Activity	8p23.1_Amp:4	0.560276
8q24.3_Del	0.911185	0.812084	simpl_interchr	Low Activity	8q24.3_Del:4	0.564419
SH2B3:missense.snv	0.912235	0.899464	simpl_interchr	Low Activity	SH2B3:missense.snv:4	0.564731
FXR1:flank.sv	0.915901	0.809475	simpl_interchr	Low Activity	FXR1:flank.sv:4	0.566661
NOTCH2:missense.snv	0.921859	0.988165	simpl_interchr	Low Activity	NOTCH2:missense.snv:4	0.567626
TET2:missense.snv	0.921859	0.988165	simpl_interchr	Low Activity	TET2:missense.snv:4	0.567626
PTPRB:missense.snv	0.921859	0.988165	simpl_interchr	Low Activity	PTPRB:missense.snv:4	0.567626
NCKAP1:missense.snv	0.921859	0.988165	simpl_interchr	Low Activity	NCKAP1:missense.snv:4	0.567626
MYO5A:missense.snv	0.921859	0.988165	simpl_interchr	Low Activity	MYO5A:missense.snv:4	0.567626
MYC:flank.sv	0.92376	0.898162	simpl_interchr	Low Activity	MYC:flank.sv:4	0.567998
CNBD1:coding.sv	0.927043	0.938163	simpl_interchr	Low Activity	CNBD1:coding.sv:4	0.568792
20q13.33_Del_b	0.927153	0.911425	simpl_interchr	Low Activity	20q13.33_Del_b:4	0.568792
ADA:missense.snv	0.93266	0.9198	simpl_interchr	Low Activity	ADA:missense.snv:4	0.57155
SETD2:missense.snv	0.939569	0.912142	simpl_interchr	Low Activity	SETD2:missense.snv:4	0.572726
FRYL:missense.snv	0.957678	0.981594	simpl_interchr	Low Activity	FRYL:missense.snv:4	0.576202
FN1:missense.snv	0.957678	0.981594	simpl_interchr	Low Activity	FN1:missense.snv:4	0.576202
NCOA1:missense.snv	0.957678	0.981594	simpl_interchr	Low Activity	NCOA1:missense.snv:4	0.576202
RNF213:missense.snv	0.957678	0.981594	simpl_interchr	Low Activity	RNF213:missense.snv:4	0.576202
PDGFRA:missense.snv	0.96	0.968516	simpl_interchr	Low Activity	PDGFRA:missense.snv:4	0.577005
KMT2D:truncating.snv	0.963483	0.736217	simpl_interchr	Low Activity	KMT2D:truncating.snv:4	0.577555
AMER1:missense.snv	0.971545	0.866145	simpl_interchr	Low Activity	AMER1:missense.snv:4	0.579546
CDH11:flank.sv	0.974467	0.992389	simpl_interchr	Low Activity	CDH11:flank.sv:4	0.580252
ERC1:missense.snv	0.977203	0.884064	simpl_interchr	Low Activity	ERC1:missense.snv:4	0.580252
CHIC2:amp	0.978657	0.76921	simpl_interchr	Low Activity	CHIC2:amp:4	0.580781
TEC:flank.sv	0.991488	0.997062	simpl_interchr	Low Activity	TEC:flank.sv:4	0.583382
TUBG1:missense.snv	0.996034	0.976516	simpl_interchr	Low Activity	TUBG1:missense.snv:4	0.583382
20q11.21_Amp	1	0.903331	simpl_interchr	Low Activity	20q11.21_Amp:4	0.585041
HIST1H3B:p.K28M	0.00340219	2.226	simpl_short_dup	High Activity	HIST1H3B:p.K28M:2	0.0642785
ACVR1:missense.snv	0.00356677	1.95248	simpl_short_dup	High Activity	ACVR1:missense.snv:2	0.0642785
HIST1H3B:p.R27R	0.00637906	4.01351	simpl_short_dup	High Activity	HIST1H3B:p.R27R:2	0.0774313
ASXL1:truncating.snv	0.0103737	2.30513	simpl_short_dup	High Activity	ASXL1:truncating.snv:2	0.0906666
MYC:flank.sv	0.0208089	1.66525	simpl_short_dup	High Activity	MYC:flank.sv:2	0.122876
FAF1:coding.sv	0.0209179	2.70087	simpl_short_dup	High Activity	FAF1:coding.sv:2	0.122876
FBXW7:missense.snv	0.0285981	2.65764	simpl_short_dup	High Activity	FBXW7:missense.snv:2	0.134842
TERT:PROMOTER_snvs	0.05842	1.79884	simpl_short_dup	High Activity	TERT:PROMOTER_snvs:2	0.186186
PPM1D:truncating.snv	0.0708565	1.88828	simpl_short_dup	High Activity	PPM1D:truncating.snv:2	0.199917
CCDC26:coding.sv	0.102876	1.57642	simpl_short_dup	High Activity	CCDC26:coding.sv:2	0.22369
CCDC26:part.amp	0.22954	1.69791	simpl_short_dup	High Activity	CCDC26:part.amp:2	0.311053
KMT2D:truncating.snv	0.291709	1.37566	simpl_short_dup	High Activity	KMT2D:truncating.snv:2	0.346577
TDG:coding.sv	0.297087	1.41982	simpl_short_dup	High Activity	TDG:coding.sv:2	0.349398
ARHGAP26:missense.snv	0.312978	1.02781	simpl_short_dup	High Activity	ARHGAP26:missense.snv:2	0.35909
PIK3CA:missense.snv	0.319223	1.37778	simpl_short_dup	High Activity	PIK3CA:missense.snv:2	0.362035
CSNK1G3:coding.sv	0.324322	2.30652	simpl_short_dup	High Activity	CSNK1G3:coding.sv:2	0.362832
ZNF676:missense.snv	0.336772	1.72097	simpl_short_dup	High Activity	ZNF676:missense.snv:2	0.369483
BCOR:truncating.snv	0.345759	1.32188	simpl_short_dup	High Activity	BCOR:truncating.snv:2	0.370748
2p25.1_Amp	0.38477	1.00971	simpl_short_dup	High Activity	2p25.1_Amp:2	0.388572
NOTCH2:part.amp	0.385337	1.6185	simpl_short_dup	High Activity	NOTCH2:part.amp:2	0.388572
CLTCL1:missense.snv	0.411307	1.36506	simpl_short_dup	High Activity	CLTCL1:missense.snv:2	0.393982
TCF12:missense.snv	0.446369	1.81849	simpl_short_dup	High Activity	TCF12:missense.snv:2	0.411168
2p24.3_Amp(MYCN)	0.462652	1.00926	simpl_short_dup	High Activity	2p24.3_Amp(MYCN):2	0.419065
AKT3:part.amp	0.506231	1.72811	simpl_short_dup	High Activity	AKT3:part.amp:2	0.43157
MGA:truncating.snv	0.514409	1.26993	simpl_short_dup	High Activity	MGA:truncating.snv:2	0.434056
8q24.3_Del	0.51896	1.18713	simpl_short_dup	High Activity	8q24.3_Del:2	0.436737
ACVR1:truncating.snv	0.520851	1.3999	simpl_short_dup	High Activity	ACVR1:truncating.snv:2	0.437034
FGFR1:missense.snv	0.558878	1.01874	simpl_short_dup	High Activity	FGFR1:missense.snv:2	0.449973
2p25.1_Amp(KIDINS220)	0.634875	1.07078	simpl_short_dup	High Activity	2p25.1_Amp(KIDINS220):2	0.473969
8q24.21_Amp(CCDC26)	0.685801	1.14894	simpl_short_dup	High Activity	8q24.21_Amp(CCDC26):2	0.487122
RERE:missense.snv	0.709923	1.18519	simpl_short_dup	High Activity	RERE:missense.snv:2	0.494645
20q11.21_Del	0.728269	2.01678	simpl_short_dup	High Activity	20q11.21_Del:2	0.501342
MAD1L1:coding.sv	0.748288	1.0822	simpl_short_dup	High Activity	MAD1L1:coding.sv:2	0.506216
PDGFRA:coding.sv	0.76903	1.16162	simpl_short_dup	High Activity	PDGFRA:coding.sv:2	0.510346
HIST1H3C:missense.snv	0.818703	1.30368	simpl_short_dup	High Activity	HIST1H3C:missense.snv:2	0.531105
TYRO3:missense.snv	0.822123	1.08139	simpl_short_dup	High Activity	TYRO3:missense.snv:2	0.531761
MTOR:missense.snv	0.834866	1.10686	simpl_short_dup	High Activity	MTOR:missense.snv:2	0.537122
SFRP4:part.amp	0.854507	1.20244	simpl_short_dup	High Activity	SFRP4:part.amp:2	0.543327
H3F3A:p.K28M	0.862265	1.1471	simpl_short_dup	High Activity	H3F3A:p.K28M:2	0.545238
PDGFRA:missense.snv	0.880246	1.06432	simpl_short_dup	High Activity	PDGFRA:missense.snv:2	0.552547
CDKN2C:missense.snv	0.894224	2.22693	simpl_short_dup	High Activity	CDKN2C:missense.snv:2	0.558943
20q13.33_Del_b	0.896258	1.4535	simpl_short_dup	High Activity	20q13.33_Del_b:2	0.559875
FLG2:amp	0.938641	1.34314	simpl_short_dup	High Activity	FLG2:amp:2	0.572726
SMARCA4:missense.snv	0.980114	1.08311	simpl_short_dup	High Activity	SMARCA4:missense.snv:2	0.581311
10q26.3_Del(MGMT)	0.00153757	0.351999	simpl_short_dup	Low Activity	10q26.3_Del(MGMT):2	0.0491018
PTPRD:coding.sv	0.00221386	0.133789	simpl_short_dup	Low Activity	PTPRD:coding.sv:2	0.0544293
10q23.31_Del(PTEN)	0.00301155	0.390902	simpl_short_dup	Low Activity	10q23.31_Del(PTEN):2	0.0642785
CDKN2A:homdel	0.00440741	0.197496	simpl_short_dup	Low Activity	CDKN2A:homdel:2	0.0647116
CDKN2B:homdel	0.00440741	0.197496	simpl_short_dup	Low Activity	CDKN2B:homdel:2	0.0647116
17p13.3_Del(TP53)	0.00835881	0.404724	simpl_short_dup	Low Activity	17p13.3_Del(TP53):2	0.0822027
KDM5C:flank.sv	0.00897427	0.105216	simpl_short_dup	Low Activity	KDM5C:flank.sv:2	0.0834848
APEX2:flank.sv	0.00897427	0.105216	simpl_short_dup	Low Activity	APEX2:flank.sv:2	0.0834848
BRAF:missense.snv	0.0111189	0.122532	simpl_short_dup	Low Activity	BRAF:missense.snv:2	0.0906666
TP53:missense.snv	0.0134124	0.530422	simpl_short_dup	Low Activity	TP53:missense.snv:2	0.0992363
ZNF479:flank.sv	0.0142344	0.366906	simpl_short_dup	Low Activity	ZNF479:flank.sv:2	0.10351
9p21.3_Del(CDKN2A)	0.0163491	0.272939	simpl_short_dup	Low Activity	9p21.3_Del(CDKN2A):2	0.111802
CTNND1:flank.sv	0.0165063	0.121717	simpl_short_dup	Low Activity	CTNND1:flank.sv:2	0.112134
CNTNAP2:part.amp	0.0207421	0.111997	simpl_short_dup	Low Activity	CNTNAP2:part.amp:2	0.122876
ANKRD11:part.amp	0.0212457	5.0886e-55	simpl_short_dup	Low Activity	ANKRD11:part.amp:2	0.123053
CLOCK:flank.sv	0.0222251	0.28149	simpl_short_dup	Low Activity	CLOCK:flank.sv:2	0.124254
IGF2R:missense.snv	0.0244894	0.258956	simpl_short_dup	Low Activity	IGF2R:missense.snv:2	0.127074
KDR:flank.sv	0.0295838	0.29654	simpl_short_dup	Low Activity	KDR:flank.sv:2	0.136987
13q14.2_Del(RB1)	0.0302722	0.40512	simpl_short_dup	Low Activity	13q14.2_Del(RB1):2	0.138929
SPECC1:part.amp	0.0319456	0.0701295	simpl_short_dup	Low Activity	SPECC1:part.amp:2	0.142185
PTPRD:flank.sv	0.0333709	0.351568	simpl_short_dup	Low Activity	PTPRD:flank.sv:2	0.143129
MTAP:flank.sv	0.0336425	0.184389	simpl_short_dup	Low Activity	MTAP:flank.sv:2	0.143129
MSI2:part.amp	0.0345785	0.234253	simpl_short_dup	Low Activity	MSI2:part.amp:2	0.145145
YY2:missense.snv	0.0352674	0.112636	simpl_short_dup	Low Activity	YY2:missense.snv:2	0.146843
4q12_Amp(PDGFRA)	0.0364583	0.364056	simpl_short_dup	Low Activity	4q12_Amp(PDGFRA):2	0.148856
8q24.21_Amp(MYC)	0.0371726	0.370199	simpl_short_dup	Low Activity	8q24.21_Amp(MYC):2	0.150527
7q21.2_Amp(CDK6)	0.0378462	0.433568	simpl_short_dup	Low Activity	7q21.2_Amp(CDK6):2	0.15183
MYCN:ExChr_amp	0.0382295	0.211146	simpl_short_dup	Low Activity	MYCN:ExChr_amp:2	0.15183
SMC6:ExChr_amp	0.0382295	0.211146	simpl_short_dup	Low Activity	SMC6:ExChr_amp:2	0.15183
ID2:ExChr_amp	0.0417909	0.0946848	simpl_short_dup	Low Activity	ID2:ExChr_amp:2	0.159237
ADA:missense.snv	0.0428014	0.0757189	simpl_short_dup	Low Activity	ADA:missense.snv:2	0.160567
FIP1L1:part.amp	0.0495156	0.285087	simpl_short_dup	Low Activity	FIP1L1:part.amp:2	0.169912
CCDC26:flank.sv	0.0497543	0.150137	simpl_short_dup	Low Activity	CCDC26:flank.sv:2	0.169912
MAP2K4:coding.sv	0.0500227	0.037398	simpl_short_dup	Low Activity	MAP2K4:coding.sv:2	0.169912
7p11.2_Amp(EGFR)	0.0527682	0.51052	simpl_short_dup	Low Activity	7p11.2_Amp(EGFR):2	0.175581
SMC6:flank.sv	0.0533492	0.265071	simpl_short_dup	Low Activity	SMC6:flank.sv:2	0.175581
19q13.43_Del	0.0566412	0.443609	simpl_short_dup	Low Activity	19q13.43_Del:2	0.1826
HDAC2:flank.sv	0.0615552	0.403125	simpl_short_dup	Low Activity	HDAC2:flank.sv:2	0.190305
PRKD1:coding.sv	0.0633931	0.0852169	simpl_short_dup	Low Activity	PRKD1:coding.sv:2	0.191992
CUL4A:missense.snv	0.065856	0.1556	simpl_short_dup	Low Activity	CUL4A:missense.snv:2	0.196608
EYA1:missense.snv	0.0662813	0.114295	simpl_short_dup	Low Activity	EYA1:missense.snv:2	0.197239
LSM14A:flank.sv	0.0668886	0.207138	simpl_short_dup	Low Activity	LSM14A:flank.sv:2	0.198474
CLOCK:coding.sv	0.0677656	0.0968381	simpl_short_dup	Low Activity	CLOCK:coding.sv:2	0.199321
IDH2:flank.sv	0.0684785	0.180889	simpl_short_dup	Low Activity	IDH2:flank.sv:2	0.199321
NF1:truncating.snv	0.0717076	0.521176	simpl_short_dup	Low Activity	NF1:truncating.snv:2	0.199917
MET:part.amp	0.0721006	7.67702e-55	simpl_short_dup	Low Activity	MET:part.amp:2	0.199917
DCC:coding.sv	0.0743447	0.0149843	simpl_short_dup	Low Activity	DCC:coding.sv:2	0.199917
ERC1:coding.sv	0.0785707	0.209938	simpl_short_dup	Low Activity	ERC1:coding.sv:2	0.203338
7p15.1_Amp	0.0828817	0.542316	simpl_short_dup	Low Activity	7p15.1_Amp:2	0.209354
MET:flank.sv	0.0834879	0.295435	simpl_short_dup	Low Activity	MET:flank.sv:2	0.209354
CRTC3:missense.snv	0.0835308	0.0715841	simpl_short_dup	Low Activity	CRTC3:missense.snv:2	0.209354
8p23.2_Del	0.0846613	0.340474	simpl_short_dup	Low Activity	8p23.2_Del:2	0.211162
MTAP:homdel	0.0873168	0.307265	simpl_short_dup	Low Activity	MTAP:homdel:2	0.212877
MLLT3:coding.sv	0.0876401	0.243961	simpl_short_dup	Low Activity	MLLT3:coding.sv:2	0.212877
NCOA1:missense.snv	0.0876401	0.320424	simpl_short_dup	Low Activity	NCOA1:missense.snv:2	0.212877
PDGFRA:part.amp	0.087704	0.0480926	simpl_short_dup	Low Activity	PDGFRA:part.amp:2	0.212877
PTPRD:part.amp	0.089035	0.0320435	simpl_short_dup	Low Activity	PTPRD:part.amp:2	0.212877
TEC:flank.sv	0.0894018	0.188767	simpl_short_dup	Low Activity	TEC:flank.sv:2	0.212877
REV3L:missense.snv	0.0995063	0.314447	simpl_short_dup	Low Activity	REV3L:missense.snv:2	0.220995
EGFR:ExChr_amp	0.101539	0.109765	simpl_short_dup	Low Activity	EGFR:ExChr_amp:2	0.222931
EGFR:coding.sv	0.101539	0.109765	simpl_short_dup	Low Activity	EGFR:coding.sv:2	0.222931
ALMS1:missense.snv	0.105903	0.329569	simpl_short_dup	Low Activity	ALMS1:missense.snv:2	0.227822
POLD1:missense.snv	0.109973	0.180967	simpl_short_dup	Low Activity	POLD1:missense.snv:2	0.23034
AKT3:missense.snv	0.111154	0.151054	simpl_short_dup	Low Activity	AKT3:missense.snv:2	0.230979
CNBD1:coding.sv	0.11908	0.0950854	simpl_short_dup	Low Activity	CNBD1:coding.sv:2	0.231938
WWOX:coding.sv	0.121818	0.0702323	simpl_short_dup	Low Activity	WWOX:coding.sv:2	0.231938
GPC5:coding.sv	0.124074	0.112127	simpl_short_dup	Low Activity	GPC5:coding.sv:2	0.232109
DLC1:missense.snv	0.124585	0.19032	simpl_short_dup	Low Activity	DLC1:missense.snv:2	0.232109
HUS1:part.amp	0.127442	0.116723	simpl_short_dup	Low Activity	HUS1:part.amp:2	0.23321
17p11.2_Amp	0.129093	0.346978	simpl_short_dup	Low Activity	17p11.2_Amp:2	0.23321
PRKD1:missense.snv	0.13018	0.335077	simpl_short_dup	Low Activity	PRKD1:missense.snv:2	0.23321
BCLAF1:missense.snv	0.131293	0.198721	simpl_short_dup	Low Activity	BCLAF1:missense.snv:2	0.233835
FIP1L1:ExChr_amp	0.131413	0.479796	simpl_short_dup	Low Activity	FIP1L1:ExChr_amp:2	0.233835
PDGFRA:ExChr_amp	0.131413	0.479796	simpl_short_dup	Low Activity	PDGFRA:ExChr_amp:2	0.233835
MLLT3:flank.sv	0.134822	0.333569	simpl_short_dup	Low Activity	MLLT3:flank.sv:2	0.236863
7q31.2_Amp(MET)	0.134846	0.55448	simpl_short_dup	Low Activity	7q31.2_Amp(MET):2	0.236863
CCT7:missense.snv	0.136255	0.104159	simpl_short_dup	Low Activity	CCT7:missense.snv:2	0.236863
SOX2:flank.sv	0.136658	0.579994	simpl_short_dup	Low Activity	SOX2:flank.sv:2	0.237165
MSI2:coding.sv	0.142386	0.0822715	simpl_short_dup	Low Activity	MSI2:coding.sv:2	0.243021
POLR2I:flank.sv	0.143902	0.486651	simpl_short_dup	Low Activity	POLR2I:flank.sv:2	0.244799
OPCML:coding.sv	0.14553	0.137563	simpl_short_dup	Low Activity	OPCML:coding.sv:2	0.246352
AFF3:coding.sv	0.150333	0.143177	simpl_short_dup	Low Activity	AFF3:coding.sv:2	0.250466
LARP4B:flank.sv	0.155081	0.444485	simpl_short_dup	Low Activity	LARP4B:flank.sv:2	0.252737
FLG2:missense.snv	0.155372	0.421809	simpl_short_dup	Low Activity	FLG2:missense.snv:2	0.252737
ELMO2:coding.sv	0.158985	0.138099	simpl_short_dup	Low Activity	ELMO2:coding.sv:2	0.256512
ARHGEF10:missense.snv	0.169104	0.224339	simpl_short_dup	Low Activity	ARHGEF10:missense.snv:2	0.267677
TRRAP:missense.snv	0.169449	0.342919	simpl_short_dup	Low Activity	TRRAP:missense.snv:2	0.267677
FANCI:flank.sv	0.170897	0.212286	simpl_short_dup	Low Activity	FANCI:flank.sv:2	0.269006
SHFM1:coding.sv	0.172625	0.0968451	simpl_short_dup	Low Activity	SHFM1:coding.sv:2	0.270901
PDGFRA:flank.sv	0.173046	0.507406	simpl_short_dup	Low Activity	PDGFRA:flank.sv:2	0.271148
CDC27:missense.snv	0.178689	0.362684	simpl_short_dup	Low Activity	CDC27:missense.snv:2	0.274574
ROBO2:part.amp	0.179955	0.120407	simpl_short_dup	Low Activity	ROBO2:part.amp:2	0.275698
TOP1:missense.snv	0.180631	0.188167	simpl_short_dup	Low Activity	TOP1:missense.snv:2	0.275916
BIRC6:missense.snv	0.181344	0.367689	simpl_short_dup	Low Activity	BIRC6:missense.snv:2	0.276188
PTPN6:coding.sv	0.190662	0.0668194	simpl_short_dup	Low Activity	PTPN6:coding.sv:2	0.286159
ARID2:truncating.snv	0.199285	0.153279	simpl_short_dup	Low Activity	ARID2:truncating.snv:2	0.295426
TFDP2:truncating.snv	0.199285	0.153279	simpl_short_dup	Low Activity	TFDP2:truncating.snv:2	0.295426
WWOX:missense.snv	0.199285	0.153279	simpl_short_dup	Low Activity	WWOX:missense.snv:2	0.295426
TP53:truncating.snv	0.200678	0.563003	simpl_short_dup	Low Activity	TP53:truncating.snv:2	0.295426
KDM5A:flank.sv	0.201118	0.464423	simpl_short_dup	Low Activity	KDM5A:flank.sv:2	0.295426
FIP1L1:flank.sv	0.203361	0.484675	simpl_short_dup	Low Activity	FIP1L1:flank.sv:2	0.296655
CHIC2:ExChr_amp	0.203639	0.533178	simpl_short_dup	Low Activity	CHIC2:ExChr_amp:2	0.296655
TP53:coding.sv	0.205286	0.0739407	simpl_short_dup	Low Activity	TP53:coding.sv:2	0.297304
EXT2:flank.sv	0.207895	0.340094	simpl_short_dup	Low Activity	EXT2:flank.sv:2	0.297435
ALKBH3:flank.sv	0.207895	0.340094	simpl_short_dup	Low Activity	ALKBH3:flank.sv:2	0.297435
KEAP1:missense.snv	0.208027	0.218962	simpl_short_dup	Low Activity	KEAP1:missense.snv:2	0.297435
PTPRK:missense.snv	0.209524	0.259979	simpl_short_dup	Low Activity	PTPRK:missense.snv:2	0.297598
ARID1A:missense.snv	0.212507	0.37604	simpl_short_dup	Low Activity	ARID1A:missense.snv:2	0.299774
FAT4:missense.snv	0.212507	0.37604	simpl_short_dup	Low Activity	FAT4:missense.snv:2	0.299774
NCOR2:missense.snv	0.212507	0.37604	simpl_short_dup	Low Activity	NCOR2:missense.snv:2	0.299774
KIT:ExChr_amp	0.213955	0.534869	simpl_short_dup	Low Activity	KIT:ExChr_amp:2	0.300516
SPECC1:coding.sv	0.215244	0.190571	simpl_short_dup	Low Activity	SPECC1:coding.sv:2	0.301165
NF1:missense.snv	0.215962	0.406212	simpl_short_dup	Low Activity	NF1:missense.snv:2	0.301762
ELMO2:truncating.snv	0.22009	0.238936	simpl_short_dup	Low Activity	ELMO2:truncating.snv:2	0.305784
RB1:coding.sv	0.221219	0.352383	simpl_short_dup	Low Activity	RB1:coding.sv:2	0.305797
RNF213:missense.snv	0.221649	0.368088	simpl_short_dup	Low Activity	RNF213:missense.snv:2	0.305982
POT1:missense.snv	0.222705	0.208101	simpl_short_dup	Low Activity	POT1:missense.snv:2	0.306211
INPPL1:missense.snv	0.222705	0.208101	simpl_short_dup	Low Activity	INPPL1:missense.snv:2	0.306211
TET1:missense.snv	0.222705	0.208101	simpl_short_dup	Low Activity	TET1:missense.snv:2	0.306211
BCORL1:truncating.snv	0.224432	0.161476	simpl_short_dup	Low Activity	BCORL1:truncating.snv:2	0.307594
CTNNA2:flank.sv	0.228011	0.383534	simpl_short_dup	Low Activity	CTNNA2:flank.sv:2	0.310254
ALK:coding.sv	0.233298	0.185981	simpl_short_dup	Low Activity	ALK:coding.sv:2	0.312516
DDB2:flank.sv	0.233343	0.292547	simpl_short_dup	Low Activity	DDB2:flank.sv:2	0.312516
KMT2A:truncating.snv	0.235001	0.285021	simpl_short_dup	Low Activity	KMT2A:truncating.snv:2	0.312541
KIT:flank.sv	0.235654	0.626985	simpl_short_dup	Low Activity	KIT:flank.sv:2	0.312541
FRYL:missense.snv	0.236334	0.374083	simpl_short_dup	Low Activity	FRYL:missense.snv:2	0.312541
FN1:missense.snv	0.236334	0.374083	simpl_short_dup	Low Activity	FN1:missense.snv:2	0.312541
FXR1:flank.sv	0.250029	0.660883	simpl_short_dup	Low Activity	FXR1:flank.sv:2	0.319134
FIP1L1:coding.sv	0.252257	0.602556	simpl_short_dup	Low Activity	FIP1L1:coding.sv:2	0.320788
KMT2C:truncating.snv	0.254397	0.219758	simpl_short_dup	Low Activity	KMT2C:truncating.snv:2	0.322318
ANKRD52:missense.snv	0.264361	0.408419	simpl_short_dup	Low Activity	ANKRD52:missense.snv:2	0.329672
CUX1:missense.snv	0.264465	0.389058	simpl_short_dup	Low Activity	CUX1:missense.snv:2	0.329672
SETD1B:missense.snv	0.264465	0.389058	simpl_short_dup	Low Activity	SETD1B:missense.snv:2	0.329672
APC:missense.snv	0.264465	0.389058	simpl_short_dup	Low Activity	APC:missense.snv:2	0.329672
ARID1B:missense.snv	0.264465	0.389058	simpl_short_dup	Low Activity	ARID1B:missense.snv:2	0.329672
MED23:missense.snv	0.264465	0.389058	simpl_short_dup	Low Activity	MED23:missense.snv:2	0.329672
EGFR:flank.sv	0.264473	0.442411	simpl_short_dup	Low Activity	EGFR:flank.sv:2	0.329672
KMT2C:part.amp	0.271236	0.216336	simpl_short_dup	Low Activity	KMT2C:part.amp:2	0.335824
CDH11:flank.sv	0.274304	0.660933	simpl_short_dup	Low Activity	CDH11:flank.sv:2	0.335967
TERT:missense.snv	0.289098	0.227531	simpl_short_dup	Low Activity	TERT:missense.snv:2	0.346426
RB1:missense.snv	0.289748	0.396938	simpl_short_dup	Low Activity	RB1:missense.snv:2	0.346426
PML:missense.snv	0.292049	0.405648	simpl_short_dup	Low Activity	PML:missense.snv:2	0.346577
5p15.33_Del	0.294597	0.698323	simpl_short_dup	Low Activity	5p15.33_Del:2	0.34829
NTRK3:coding.sv	0.296986	0.16785	simpl_short_dup	Low Activity	NTRK3:coding.sv:2	0.349398
CTNND1:coding.sv	0.297087	0.123723	simpl_short_dup	Low Activity	CTNND1:coding.sv:2	0.349398
SETD1B:truncating.snv	0.304904	0.287546	simpl_short_dup	Low Activity	SETD1B:truncating.snv:2	0.353359
NF1:coding.sv	0.312676	0.386899	simpl_short_dup	Low Activity	NF1:coding.sv:2	0.35909
TOP3B:flank.sv	0.312832	0.57632	simpl_short_dup	Low Activity	TOP3B:flank.sv:2	0.35909
MAPK1:flank.sv	0.312832	0.57632	simpl_short_dup	Low Activity	MAPK1:flank.sv:2	0.35909
4q35.1_Del	0.314699	0.52064	simpl_short_dup	Low Activity	4q35.1_Del:2	0.360445
PTEN:truncating.snv	0.317821	0.717421	simpl_short_dup	Low Activity	PTEN:truncating.snv:2	0.362035
TDP2:missense.snv	0.318728	0.226029	simpl_short_dup	Low Activity	TDP2:missense.snv:2	0.362035
BIRC6:truncating.snv	0.318728	0.226029	simpl_short_dup	Low Activity	BIRC6:truncating.snv:2	0.362035
NDRG1:part.amp	0.318728	0.22901	simpl_short_dup	Low Activity	NDRG1:part.amp:2	0.362035
FIP1L1:intron.sv	0.320577	0.537153	simpl_short_dup	Low Activity	FIP1L1:intron.sv:2	0.362035
EBF1:coding.sv	0.323782	0.14189	simpl_short_dup	Low Activity	EBF1:coding.sv:2	0.362784
17q25.3_Del	0.329234	0.428166	simpl_short_dup	Low Activity	17q25.3_Del:2	0.366969
6q25.2_Del	0.330154	0.718782	simpl_short_dup	Low Activity	6q25.2_Del:2	0.367008
CSF1R:missense.snv	0.331789	0.435494	simpl_short_dup	Low Activity	CSF1R:missense.snv:2	0.367601
MYO5A:missense.snv	0.334872	0.43778	simpl_short_dup	Low Activity	MYO5A:missense.snv:2	0.369483
ZNF292:missense.snv	0.335016	0.44773	simpl_short_dup	Low Activity	ZNF292:missense.snv:2	0.369483
PBRM1:truncating.snv	0.339366	0.414854	simpl_short_dup	Low Activity	PBRM1:truncating.snv:2	0.369483
PRDM2:missense.snv	0.340895	0.418569	simpl_short_dup	Low Activity	PRDM2:missense.snv:2	0.369483
KRAS:missense.snv	0.352008	0.465727	simpl_short_dup	Low Activity	KRAS:missense.snv:2	0.374339
DNMBP:missense.snv	0.357729	0.473685	simpl_short_dup	Low Activity	DNMBP:missense.snv:2	0.377979
MTNR1A:missense.snv	0.357729	0.473685	simpl_short_dup	Low Activity	MTNR1A:missense.snv:2	0.377979
WNK2:missense.snv	0.36202	0.425597	simpl_short_dup	Low Activity	WNK2:missense.snv:2	0.379514
TUBG1:missense.snv	0.362405	0.518608	simpl_short_dup	Low Activity	TUBG1:missense.snv:2	0.379532
ATRX:missense.snv	0.371903	0.345512	simpl_short_dup	Low Activity	ATRX:missense.snv:2	0.383158
EGFR:missense.snv	0.376257	0.607867	simpl_short_dup	Low Activity	EGFR:missense.snv:2	0.383158
CSMD3:coding.sv	0.379498	0.378201	simpl_short_dup	Low Activity	CSMD3:coding.sv:2	0.385318
IDH1:missense.snv	0.381302	0.5434	simpl_short_dup	Low Activity	IDH1:missense.snv:2	0.386646
LIG1:missense.snv	0.386421	0.424514	simpl_short_dup	Low Activity	LIG1:missense.snv:2	0.389285
RGS7:part.amp	0.389375	0.280137	simpl_short_dup	Low Activity	RGS7:part.amp:2	0.39007
ERC1:part.amp	0.402802	0.219299	simpl_short_dup	Low Activity	ERC1:part.amp:2	0.393512
NFIB:flank.sv	0.403	0.52875	simpl_short_dup	Low Activity	NFIB:flank.sv:2	0.393512
ATRX:truncating.snv	0.408012	0.500556	simpl_short_dup	Low Activity	ATRX:truncating.snv:2	0.393982
MAP3K13:part.amp	0.409277	0.67328	simpl_short_dup	Low Activity	MAP3K13:part.amp:2	0.393982
UBR5:missense.snv	0.411307	0.448488	simpl_short_dup	Low Activity	UBR5:missense.snv:2	0.393982
KMT2A:missense.snv	0.411372	0.43778	simpl_short_dup	Low Activity	KMT2A:missense.snv:2	0.393982
ZNF133:missense.snv	0.411372	0.43778	simpl_short_dup	Low Activity	ZNF133:missense.snv:2	0.393982
PTPRT:missense.snv	0.411372	0.43778	simpl_short_dup	Low Activity	PTPRT:missense.snv:2	0.393982
PPFIA1:missense.snv	0.415976	0.41461	simpl_short_dup	Low Activity	PPFIA1:missense.snv:2	0.395584
NTRK3:missense.snv	0.417221	0.282064	simpl_short_dup	Low Activity	NTRK3:missense.snv:2	0.395975
CHIC2:amp	0.426792	0.3065	simpl_short_dup	Low Activity	CHIC2:amp:2	0.40247
RALGAPB:missense.snv	0.42984	0.436087	simpl_short_dup	Low Activity	RALGAPB:missense.snv:2	0.403868
TCF12:coding.sv	0.437291	0.322019	simpl_short_dup	Low Activity	TCF12:coding.sv:2	0.407147
KDR:ExChr_amp	0.438763	0.614918	simpl_short_dup	Low Activity	KDR:ExChr_amp:2	0.407147
CLOCK:ExChr_amp	0.438763	0.614918	simpl_short_dup	Low Activity	CLOCK:ExChr_amp:2	0.407147
DDB1:missense.snv	0.438763	0.499102	simpl_short_dup	Low Activity	DDB1:missense.snv:2	0.407147
STAG2:missense.snv	0.444646	0.562625	simpl_short_dup	Low Activity	STAG2:missense.snv:2	0.41008
SDHA:flank.sv	0.452439	0.679542	simpl_short_dup	Low Activity	SDHA:flank.sv:2	0.413806
PDE4DIP:missense.snv	0.459394	0.476719	simpl_short_dup	Low Activity	PDE4DIP:missense.snv:2	0.416844
PDGFRL:missense.snv	0.4644	0.471859	simpl_short_dup	Low Activity	PDGFRL:missense.snv:2	0.419222
TERT:flank.sv	0.470819	0.735221	simpl_short_dup	Low Activity	TERT:flank.sv:2	0.42202
NCKAP1:missense.snv	0.475022	0.453902	simpl_short_dup	Low Activity	NCKAP1:missense.snv:2	0.423364
NOTCH2:missense.snv	0.475022	0.453902	simpl_short_dup	Low Activity	NOTCH2:missense.snv:2	0.423364
TET2:missense.snv	0.475022	0.453902	simpl_short_dup	Low Activity	TET2:missense.snv:2	0.423364
SETD2:missense.snv	0.475502	0.460248	simpl_short_dup	Low Activity	SETD2:missense.snv:2	0.423364
DNMT3A:missense.snv	0.475502	0.460248	simpl_short_dup	Low Activity	DNMT3A:missense.snv:2	0.423364
CLOCK:part.amp	0.48449	0.620407	simpl_short_dup	Low Activity	CLOCK:part.amp:2	0.424643
AKAP9:missense.snv	0.489694	0.514611	simpl_short_dup	Low Activity	AKAP9:missense.snv:2	0.426372
ATR:missense.snv	0.497382	0.457582	simpl_short_dup	Low Activity	ATR:missense.snv:2	0.430453
ATP8B3:missense.snv	0.499294	0.534637	simpl_short_dup	Low Activity	ATP8B3:missense.snv:2	0.430453
ELANE:flank.sv	0.500653	0.761222	simpl_short_dup	Low Activity	ELANE:flank.sv:2	0.430453
FSTL3:flank.sv	0.500653	0.761222	simpl_short_dup	Low Activity	FSTL3:flank.sv:2	0.430453
KDM5A:coding.sv	0.50165	0.737522	simpl_short_dup	Low Activity	KDM5A:coding.sv:2	0.43095
PDGFRA:truncating.snv	0.503058	0.376978	simpl_short_dup	Low Activity	PDGFRA:truncating.snv:2	0.431443
17q11.2_Del(NF1)	0.508604	0.523987	simpl_short_dup	Low Activity	17q11.2_Del(NF1):2	0.431894
ATM:truncating.snv	0.514409	0.37511	simpl_short_dup	Low Activity	ATM:truncating.snv:2	0.434056
CTNNA2:missense.snv	0.514513	0.862557	simpl_short_dup	Low Activity	CTNNA2:missense.snv:2	0.434056
EXT2:coding.sv	0.515167	0.222592	simpl_short_dup	Low Activity	EXT2:coding.sv:2	0.434254
ETV1:part.amp	0.520851	0.630097	simpl_short_dup	Low Activity	ETV1:part.amp:2	0.437034
TSPAN16:missense.snv	0.521006	0.236332	simpl_short_dup	Low Activity	TSPAN16:missense.snv:2	0.437034
NCOR1:missense.snv	0.526101	0.463726	simpl_short_dup	Low Activity	NCOR1:missense.snv:2	0.439523
ERC1:flank.sv	0.533637	0.433275	simpl_short_dup	Low Activity	ERC1:flank.sv:2	0.443308
20q11.21_Amp	0.53967	0.718683	simpl_short_dup	Low Activity	20q11.21_Amp:2	0.444715
ARID1B:truncating.snv	0.543576	0.87356	simpl_short_dup	Low Activity	ARID1B:truncating.snv:2	0.444715
CCDC26:ExChr_amp	0.543576	0.268547	simpl_short_dup	Low Activity	CCDC26:ExChr_amp:2	0.444715
MYC:ExChr_amp	0.543576	0.268547	simpl_short_dup	Low Activity	MYC:ExChr_amp:2	0.444715
LRRC37B:missense.snv	0.547029	0.330269	simpl_short_dup	Low Activity	LRRC37B:missense.snv:2	0.446123
PLCG1:missense.snv	0.547029	0.358359	simpl_short_dup	Low Activity	PLCG1:missense.snv:2	0.446123
MCM7:missense.snv	0.547029	0.358359	simpl_short_dup	Low Activity	MCM7:missense.snv:2	0.446123
20q13.33_Del_a	0.549455	0.942831	simpl_short_dup	Low Activity	20q13.33_Del_a:2	0.44745
COL2A1:flank.sv	0.558878	0.448973	simpl_short_dup	Low Activity	COL2A1:flank.sv:2	0.449973
KMT2C:coding.sv	0.558889	0.653705	simpl_short_dup	Low Activity	KMT2C:coding.sv:2	0.449973
FRYL:truncating.snv	0.566623	0.269013	simpl_short_dup	Low Activity	FRYL:truncating.snv:2	0.449973
TCF7L2:missense.snv	0.567081	0.389318	simpl_short_dup	Low Activity	TCF7L2:missense.snv:2	0.449973
SPEN:missense.snv	0.567685	0.469616	simpl_short_dup	Low Activity	SPEN:missense.snv:2	0.449973
RALGDS:missense.snv	0.567685	0.469616	simpl_short_dup	Low Activity	RALGDS:missense.snv:2	0.449973
RANBP2:missense.snv	0.567685	0.469616	simpl_short_dup	Low Activity	RANBP2:missense.snv:2	0.449973
MUC20:missense.snv	0.567685	0.469616	simpl_short_dup	Low Activity	MUC20:missense.snv:2	0.449973
SH2B3:missense.snv	0.56992	0.44775	simpl_short_dup	Low Activity	SH2B3:missense.snv:2	0.449973
PIK3R1:missense.snv	0.570627	0.551215	simpl_short_dup	Low Activity	PIK3R1:missense.snv:2	0.449973
RGPD3:missense.snv	0.573842	0.506523	simpl_short_dup	Low Activity	RGPD3:missense.snv:2	0.449973
APEX1:flank.sv	0.574296	0.890925	simpl_short_dup	Low Activity	APEX1:flank.sv:2	0.449973
PARP2:flank.sv	0.574296	0.890925	simpl_short_dup	Low Activity	PARP2:flank.sv:2	0.449973
CHD8:flank.sv	0.574296	0.890925	simpl_short_dup	Low Activity	CHD8:flank.sv:2	0.449973
LRP1B:intron.sv	0.582243	0.255557	simpl_short_dup	Low Activity	LRP1B:intron.sv:2	0.450329
ANK1:missense.snv	0.584685	0.523774	simpl_short_dup	Low Activity	ANK1:missense.snv:2	0.451229
DROSHA:missense.snv	0.589913	0.5127	simpl_short_dup	Low Activity	DROSHA:missense.snv:2	0.453397
PTEN:coding.sv	0.590128	0.566524	simpl_short_dup	Low Activity	PTEN:coding.sv:2	0.453397
RLIM:missense.snv	0.590128	0.60323	simpl_short_dup	Low Activity	RLIM:missense.snv:2	0.453397
KMT2C:missense.snv	0.595161	0.562717	simpl_short_dup	Low Activity	KMT2C:missense.snv:2	0.454558
LIFR:missense.snv	0.604535	0.474585	simpl_short_dup	Low Activity	LIFR:missense.snv:2	0.458327
SETD2:truncating.snv	0.610603	0.650054	simpl_short_dup	Low Activity	SETD2:truncating.snv:2	0.461235
ZNF331:missense.snv	0.614073	0.533902	simpl_short_dup	Low Activity	ZNF331:missense.snv:2	0.463178
RAD52:flank.sv	0.633068	0.591482	simpl_short_dup	Low Activity	RAD52:flank.sv:2	0.473356
BCL11A:missense.snv	0.638436	0.584034	simpl_short_dup	Low Activity	BCL11A:missense.snv:2	0.475037
NOTCH1:missense.snv	0.643327	0.811636	simpl_short_dup	Low Activity	NOTCH1:missense.snv:2	0.47514
ESR1:missense.snv	0.646647	0.585481	simpl_short_dup	Low Activity	ESR1:missense.snv:2	0.47514
CNTNAP2:coding.sv	0.648832	0.483107	simpl_short_dup	Low Activity	CNTNAP2:coding.sv:2	0.47514
PTPRD:truncating.snv	0.649203	0.254916	simpl_short_dup	Low Activity	PTPRD:truncating.snv:2	0.47514
12p12.1_Amp	0.661557	0.54681	simpl_short_dup	Low Activity	12p12.1_Amp:2	0.481758
HLF:flank.sv	0.661567	0.589966	simpl_short_dup	Low Activity	HLF:flank.sv:2	0.481758
KIT:amp	0.665015	0.365904	simpl_short_dup	Low Activity	KIT:amp:2	0.482228
PDGFRA:amp	0.665015	0.365904	simpl_short_dup	Low Activity	PDGFRA:amp:2	0.482228
ATRX:coding.sv	0.676308	0.53444	simpl_short_dup	Low Activity	ATRX:coding.sv:2	0.485305
CTNND2:missense.snv	0.681263	0.464122	simpl_short_dup	Low Activity	CTNND2:missense.snv:2	0.485822
MYH11:missense.snv	0.687401	0.565981	simpl_short_dup	Low Activity	MYH11:missense.snv:2	0.487392
GPHN:coding.sv	0.687823	0.692084	simpl_short_dup	Low Activity	GPHN:coding.sv:2	0.487392
ANKRD11:missense.snv	0.692649	0.866911	simpl_short_dup	Low Activity	ANKRD11:missense.snv:2	0.488544
H3F3A:missense.snv	0.694204	0.784704	simpl_short_dup	Low Activity	H3F3A:missense.snv:2	0.489306
CTCF:missense.snv	0.701013	0.90722	simpl_short_dup	Low Activity	CTCF:missense.snv:2	0.492467
MET:coding.sv	0.701549	0.801939	simpl_short_dup	Low Activity	MET:coding.sv:2	0.492467
CHD8:truncating.snv	0.701549	0.512846	simpl_short_dup	Low Activity	CHD8:truncating.snv:2	0.492467
COL1A1:missense.snv	0.70384	0.763653	simpl_short_dup	Low Activity	COL1A1:missense.snv:2	0.492939
AMER1:missense.snv	0.714294	0.482561	simpl_short_dup	Low Activity	AMER1:missense.snv:2	0.497293
CHD2:missense.snv	0.723813	0.550426	simpl_short_dup	Low Activity	CHD2:missense.snv:2	0.500511
MUC4:missense.snv	0.723813	0.550426	simpl_short_dup	Low Activity	MUC4:missense.snv:2	0.500511
GPC3:missense.snv	0.731287	0.586897	simpl_short_dup	Low Activity	GPC3:missense.snv:2	0.501755
15q13.3_Del	0.732275	0.611756	simpl_short_dup	Low Activity	15q13.3_Del:2	0.501755
CDK6:coding.sv	0.748288	0.322364	simpl_short_dup	Low Activity	CDK6:coding.sv:2	0.506216
AKAP9:ExChr_amp	0.75283	0.309724	simpl_short_dup	Low Activity	AKAP9:ExChr_amp:2	0.507482
CDK6:ExChr_amp	0.75283	0.309724	simpl_short_dup	Low Activity	CDK6:ExChr_amp:2	0.507482
STAT3:missense.snv	0.754645	0.521345	simpl_short_dup	Low Activity	STAT3:missense.snv:2	0.507845
PTEN:missense.snv	0.761435	0.894007	simpl_short_dup	Low Activity	PTEN:missense.snv:2	0.507845
8p23.1_Amp	0.764526	0.872337	simpl_short_dup	Low Activity	8p23.1_Amp:2	0.508993
PTPRB:missense.snv	0.788796	0.979483	simpl_short_dup	Low Activity	PTPRB:missense.snv:2	0.518465
DICER1:missense.snv	0.795678	0.539333	simpl_short_dup	Low Activity	DICER1:missense.snv:2	0.520669
MTNR1A:flank.sv	0.810091	0.907764	simpl_short_dup	Low Activity	MTNR1A:flank.sv:2	0.528074
FAT1:flank.sv	0.810091	0.907764	simpl_short_dup	Low Activity	FAT1:flank.sv:2	0.528074
NTRK2:coding.sv	0.819856	0.581399	simpl_short_dup	Low Activity	NTRK2:coding.sv:2	0.531105
LRP1B:missense.snv	0.819856	0.929232	simpl_short_dup	Low Activity	LRP1B:missense.snv:2	0.531105
LRP1B:coding.sv	0.822494	0.730163	simpl_short_dup	Low Activity	LRP1B:coding.sv:2	0.531761
ZNF292:truncating.snv	0.830314	0.905184	simpl_short_dup	Low Activity	ZNF292:truncating.snv:2	0.535813
POLR2E:flank.sv	0.844727	0.861503	simpl_short_dup	Low Activity	POLR2E:flank.sv:2	0.541106
STK11:flank.sv	0.844727	0.861503	simpl_short_dup	Low Activity	STK11:flank.sv:2	0.541106
ANKRD11:truncating.snv	0.853896	0.562738	simpl_short_dup	Low Activity	ANKRD11:truncating.snv:2	0.543273
14q12_Del	0.857751	0.97332	simpl_short_dup	Low Activity	14q12_Del:2	0.544554
DIS3L2:missense.snv	0.87231	0.575428	simpl_short_dup	Low Activity	DIS3L2:missense.snv:2	0.550578
SETD1A:missense.snv	0.878304	0.561571	simpl_short_dup	Low Activity	SETD1A:missense.snv:2	0.552319
PABPC1:missense.snv	0.879348	0.610124	simpl_short_dup	Low Activity	PABPC1:missense.snv:2	0.552319
MAP3K1:missense.snv	0.879348	0.840127	simpl_short_dup	Low Activity	MAP3K1:missense.snv:2	0.552319
ERBB4:coding.sv	0.893103	0.787473	simpl_short_dup	Low Activity	ERBB4:coding.sv:2	0.558919
MET:ExChr_amp	0.924662	0.587753	simpl_short_dup	Low Activity	MET:ExChr_amp:2	0.567998
FAM47C:missense.snv	0.924662	0.764254	simpl_short_dup	Low Activity	FAM47C:missense.snv:2	0.567998
TGM4:missense.snv	0.924662	0.568654	simpl_short_dup	Low Activity	TGM4:missense.snv:2	0.567998
CNBD1:flank.sv	0.946354	0.646079	simpl_short_dup	Low Activity	CNBD1:flank.sv:2	0.573395
SETBP1:missense.snv	0.95111	0.610259	simpl_short_dup	Low Activity	SETBP1:missense.snv:2	0.575008
MAX:missense.snv	0.95634	0.809182	simpl_short_dup	Low Activity	MAX:missense.snv:2	0.576202
PTPN11:missense.snv	0.957402	0.624146	simpl_short_dup	Low Activity	PTPN11:missense.snv:2	0.576202
MED12:missense.snv	0.963672	0.630775	simpl_short_dup	Low Activity	MED12:missense.snv:2	0.577555
CCR7:missense.snv	0.964272	0.794574	simpl_short_dup	Low Activity	CCR7:missense.snv:2	0.577555
CHIC2:flank.sv	0.976995	0.877699	simpl_short_dup	Low Activity	CHIC2:flank.sv:2	0.580252
ERC1:missense.snv	0.983694	0.791374	simpl_short_dup	Low Activity	ERC1:missense.snv:2	0.581764
SELE:missense.snv	0.985752	0.738119	simpl_short_dup	Low Activity	SELE:missense.snv:2	0.582096
MUC16:missense.snv	0.990949	0.793605	simpl_short_dup	Low Activity	MUC16:missense.snv:2	0.583382
IRS2:missense.snv	0.992876	0.694992	simpl_short_dup	Low Activity	IRS2:missense.snv:2	0.583382
